# Supplementary material for: DFT investigation of hydrogen atom-abstraction reactions of NHC-boranes by various carbon-centered radicals: barriers and correlation analyses
Source: Royal Society of Chemistry journal article supplement (doi:10.1039/d0ra07638d), 2020-01-01
Supplement: d0ra07638d1.pdf [file d0ra07638d1.pdf]

## ELECTRONIC SUPPLEMENTARY INFORMATION

DFT investigation of hydrogen atom–abstraction reactions of NHC–boranes by various carbon–centered radicals: barriers and correlation analyses

Hong-jie Qu,<sup>a,b</sup> Lang Yuan,<sup>a</sup> Cai-xin Jia,<sup>a</sup> Hai-tao Yu,<sup>\*a</sup> Hui Xu<sup>\*a</sup>

<sup>a</sup>*Key Laboratory of Functional Inorganic Material Chemistry (Ministry of Education) and School of Chemistry and Materials Science, Heilongjiang University, Harbin 150080, P. R. China*

<sup>b</sup>*College of Science, Heilongjiang Bayi Agricultural University, Daqing, 163319, P. R. China*

## List of Content

|                                                                                                                                                                                                                                                                                                                                                                                                                                                                                      |    |
|--------------------------------------------------------------------------------------------------------------------------------------------------------------------------------------------------------------------------------------------------------------------------------------------------------------------------------------------------------------------------------------------------------------------------------------------------------------------------------------|----|
| <b>Comparison and explanation of methods</b> .....                                                                                                                                                                                                                                                                                                                                                                                                                                   | 6  |
| <b>Figure S1</b> Thermal contributions ( $\Delta E_{\text{therm}}^{\ddagger}$ ) of various radical reactants. ....                                                                                                                                                                                                                                                                                                                                                                   | 7  |
| <b>Figure S2</b> Global nucleophilic (N) and electrophilic ( $\omega$ ), and local nucleophilic ( $N_C$ ) and electrophilic ( $\omega_C$ ) indexes of radical reactants.. ....                                                                                                                                                                                                                                                                                                       | 7  |
| <b>Figure S3</b> Plot of local nucleophilic index ( $N_C$ ) vs spin density ( $\rho_C$ ) for the attacking radicals. ....                                                                                                                                                                                                                                                                                                                                                            | 8  |
| <b>Figure S4</b> Global nucleophilic (N) and electrophilic ( $\omega$ ) and local nucleophilic (N) and electrophilic ( $\omega_C$ ) indexes of radical reactants vs thermal contribution ( $\Delta E_{\text{therm}}^{\ddagger}$ ) for the H-abstraction reactions of NHC-BH <sub>3</sub> (a) and NHC-BH <sub>2</sub> CN (b) by different radicals. ...                                                                                                                               | 9  |
| <b>Figure S5</b> Intrinsic barrier distribution of radical reactants. ....                                                                                                                                                                                                                                                                                                                                                                                                           | 9  |
| <b>Figure S6</b> Change of percentages of intrinsic barrier ( $\Delta E_0^{\ddagger}$ ) and thermal contribution ( $\Delta E_{\text{therm}}^{\ddagger}$ ) in activation barrier ( $\Delta E^{\ddagger}$ ) with increasing activation barrier for the H-abstraction reactions of NHC-BH <sub>3</sub> (a) and NHC-BH <sub>2</sub> CN (b) by different radicals. ....                                                                                                                   | 10 |
| <b>Figure S7</b> Histograms of activation barrier ( $\Delta E^{\ddagger}$ ) and its two components, intrinsic barrier ( $\Delta E_0^{\ddagger}$ ) and thermal contribution ( $\Delta E_{\text{therm}}^{\ddagger}$ ) for the H-abstraction reactions of NHC-BH <sub>3</sub> (a) and NHC-BH <sub>2</sub> CN (b) by different radicals. ....                                                                                                                                            | 11 |
| <b>Figure S8</b> Linear dependences of activation barrier ( $\Delta E^{\ddagger}$ ) on intrinsic barrier ( $\Delta E_0^{\ddagger}$ ) and thermal contribution ( $\Delta E_{\text{therm}}^{\ddagger}$ ) (a) and plots of nucleophilic/electrophilic indexes vs activation barrier ( $\Delta E^{\ddagger}$ ) for the H-abstraction reactions of NHC-BH <sub>3</sub> (b) and NHC-BH <sub>2</sub> CN (c). ....                                                                           | 12 |
| <b>Figure S9</b> Activation barriers ( $\Delta E^{\ddagger}$ ) of various radical reactants. ....                                                                                                                                                                                                                                                                                                                                                                                    | 13 |
| <b>Figure S10</b> Percentage stacked column chart of four components, intrinsic barrier ( $\Delta E_0^{\ddagger}$ ), thermal contribution ( $\Delta E_{\text{therm}}^{\ddagger}$ ), activation ZPVE correction ( $\Delta E_{\text{ZPVE}}^{\ddagger}$ ) and activation Gibbs free energy thermal correction ( $\Delta G_{\text{corr}}^{\ddagger}$ ), that make up free energy barrier for the H-abstraction reactions of NHC-BH <sub>3</sub> (a) and NHC-BH <sub>2</sub> CN (b). .... | 14 |

**Figure S11** Bar chart of free energy barrier ( $\Delta G^\ddagger$ ) and its three components, intrinsic barrier ( $\Delta E_0^\ddagger$ ), thermal contribution ( $\Delta E_{\text{therm}}^\ddagger$ ), and activation Gibbs free energy thermal correction ( $\Delta G_{\text{corr}}^\ddagger$ ) for the H-abstraction reactions of NHC-BH<sub>3</sub> (a) and NHC-BH<sub>2</sub>CN (b). .....15

**Figure S12** Percentage stacked column chart of three components, activation barrier ( $\Delta E^\ddagger$ ), activation ZPVE correction ( $\Delta E_{\text{ZPVE}}^\ddagger$ ) and activation Gibbs free energy thermal correction ( $\Delta G_{\text{corr}}^\ddagger$ ), that make up free energy barrier for the H-abstraction reactions of NHC-BH<sub>3</sub> (a) and NHC-BH<sub>2</sub>CN (b). .....16

**Figure S13** Bar chart of free energy barrier ( $\Delta G^\ddagger$ ) and its components, activation barrier ( $\Delta E^\ddagger$ ) and activation Gibbs free energy thermal correction ( $\Delta G_{\text{corr}}^\ddagger$ ), for the H-abstraction reactions of NHC-BH<sub>3</sub> (a) and NHC-BH<sub>2</sub>CN (b). .....17

**Figure S14** Plots of global/local nucleophilic and electrophilic indexes of radical reactants vs free energy barriers ( $\Delta G^\ddagger$ ) of H-abstraction reactions of NHC-BH<sub>3</sub> (a) and NHC-BH<sub>2</sub>CN (b). .....18

**Figure S15** Analysis of linear dependences of thermal contribution ( $\Delta E_{\text{therm}}^\ddagger$ ) on global nucleophilic (N), global electrophilic ( $\omega$ ), local nucleophilic (N<sub>C</sub>), and local electrophilic ( $\omega_C$ ) indexes for the radicals of types **I** (a), **II** (b), **III** (c), and **IV** (d). ....19

**Figure S16** Analysis of linear dependences of intrinsic barrier ( $\Delta E_0^\ddagger$ ) with global nucleophilic (N), global electrophilic ( $\omega$ ), local nucleophilic (N<sub>C</sub>), and local electrophilic ( $\omega_C$ ) indexes for the radicals of types **I** (a), **II** (b), **III** (c), and **IV** (d). ....20

**Figure S17** Analysis of linear dependences of activation barrier ( $\Delta E^\ddagger$ ) with global nucleophilic (N), global electrophilic ( $\omega$ ), local nucleophilic (N<sub>C</sub>), and local electrophilic ( $\omega_C$ ) indexes for the radicals of types **I** (a), **II** (b), **III** (c), and **IV** (d). ....21

**Figure S18** Analysis of linear dependences of free energy barrier ( $\Delta G^\ddagger$ ) with global nucleophilic (N), global electrophilic ( $\omega$ ), local nucleophilic (N<sub>C</sub>), and local electrophilic ( $\omega_C$ ) indexes for the radicals of types **I** (a), **II** (b), **III** (c), and **IV** (d). ....22

**Figure S19** Correlation analysis of the kinetic and thermodynamic quantities of the H-abstraction reactions computed at the B3LYP/6-311++G(d,p) level with those computed at the B3LYP-D3BJ/6-311++G(2d,2p),  $\omega$ B97DX/6-311++G(2d,2p), and

M06-2X/6-311++G(d,p) levels of theory. ....23

**Figure S20** Correlation analysis of the kinetic and thermodynamic quantities of the H-abstraction reactions computed at the B3LYP-D3BJ/6-311++G(2d,2p),  $\omega$ B97DX/6-311++G(2d,2p), and M06-2X/6-311++G(d,p). ....24

**Table S1** Total electronic energies (TE, hartree), zero-point vibrational energies (ZPVE, hartree/particle), Gibbs free energies (G, hartree), enthalpies (H, hartree), thermal corrections to Gibbs free energy ( $G_{\text{corr}}$ , hartree), and thermal corrections to enthalpy ( $H_{\text{corr}}$ , hartree) of the structures of NHC-boranes, NHC-boryl radicals, and RH optimized at the B3LYP/6-311++G(d,p) in BTF at 376 K. ....25

**Table S2** Total electronic energies (TE, hartree), zero-point vibrational energies (ZPVE, hartree/particle), Gibbs free energies (G, hartree), enthalpies (H, hartree), thermal corrections to Gibbs free energy ( $G_{\text{corr}}$ , hartree), and thermal corrections to enthalpy ( $H_{\text{corr}}$ , hartree) of the structures of the attacking radical  $R^{\bullet}$  optimized at the B3LYP/6-311++G(d,p) in BTF at 376 K. ....26

**Table S3** Spin densities ( $\rho_{s,C}$ ,  $e$ ) on the central C atoms, global nucleophilic (N, eV) and electrophilic indices ( $\omega$ , eV), and local nucleophilic ( $N_C$ , eV) and electrophilic indices ( $\omega_C$ , eV) of the attacking radical  $R^{\bullet}$  and NHC-boranes computed at the mpwpw91/6-311+G(d,p) in BTF. ....27

**Table S4** Total electronic energies (TE, hartree), zero-point vibrational energies (ZPVE, hartree/particle), Gibbs free energies (G, hartree), enthalpies (H, hartree), thermal corrections to Gibbs free energy ( $G_{\text{corr}}$ , hartree), and thermal corrections to enthalpy ( $H_{\text{corr}}$ , hartree) of the transition states (**TS**) of the H-atom abstraction reactions of NHC-BH<sub>3</sub> by  $R^{\bullet}$  optimized at the B3LYP/6-311++G(d,p) in BTF at 376 K. ....28

**Table S5** Total electronic energies (TE, hartree), zero-point vibrational energies (ZPVE, hartree/particle), Gibbs free energies (G, hartree), enthalpies (H, hartree), thermal corrections to Gibbs free energy ( $G_{\text{corr}}$ , hartree), and thermal corrections to enthalpy ( $H_{\text{corr}}$ , hartree) of the transition states (**TS**) of the H-atom abstraction reactions of NHC-BH<sub>2</sub>CN by  $R^{\bullet}$  optimized at the B3LYP/6-311++G(d,p) in BTF at 376 K. ....29

**Table S6** Activation barrier ( $\Delta E^{\ddagger}$ ), activation zero-point vibrational energy correction

( $\Delta E_{ZPVE}^\ddagger$ ), intrinsic barrier ( $\Delta E_0^\ddagger$ ), thermal contribution ( $\Delta E_{\text{therm}}^\ddagger$ ), activation Gibbs free energy correction ( $\Delta G_{\text{corr}}^\ddagger$ ), and Gibbs free energy barrier ( $\Delta G^\ddagger$ ) of the H-atom abstraction reactions of NHC-BH<sub>3</sub> by R<sup>•</sup> computed at the B3LYP/6-311++G(d,p) in BTF at 376 K. All units are in kcal mol<sup>-1</sup>. .....30

**Table S7** Reaction energies ( $\Delta_r E$ , kcal mol<sup>-1</sup>), reaction Gibbs free energies ( $\Delta_r G$ , kcal mol<sup>-1</sup>), reaction enthalpies ( $\Delta_r H$ , kcal mol<sup>-1</sup>), rate constants ( $k_H$ , L mol<sup>-1</sup> s<sup>-1</sup>) and activation energies ( $E_a$ , kcal mol<sup>-1</sup>) of the H-atom abstraction reactions of NHC-BH<sub>3</sub> by R<sup>•</sup> computed at the B3LYP/6-311++G(d,p) in BTF at 376 K. ....31

**Table S8** Activation barrier ( $\Delta E^\ddagger$ ), activation zero-point vibrational energy correction ( $\Delta E_{ZPVE}^\ddagger$ ), intrinsic barrier ( $\Delta E_0^\ddagger$ ), thermal contribution ( $\Delta E_{\text{therm}}^\ddagger$ ), activation Gibbs free energy correction ( $\Delta G_{\text{corr}}^\ddagger$ ), and Gibbs free energy barrier ( $\Delta G^\ddagger$ ) of the H-atom abstraction reactions of NHC-BH<sub>2</sub>CN by R<sup>•</sup> computed at the B3LYP/6-311++G(d,p) in BTF at 376 K. All units are in kcal mol<sup>-1</sup>. .....32

**Table S9** Reaction energies ( $\Delta_r E$ , kcal mol<sup>-1</sup>), reaction Gibbs free energies ( $\Delta_r G$ , kcal mol<sup>-1</sup>), reaction enthalpies ( $\Delta_r H$ , kcal mol<sup>-1</sup>), rate constants ( $k_H$ , L mol<sup>-1</sup> s<sup>-1</sup>) and activation energies ( $E_a$ , kcal mol<sup>-1</sup>) of the H-atom abstraction reactions of NHC-BH<sub>2</sub>CN by R<sup>•</sup> computed at the B3LYP/6-311++G(d,p) in BTF at 376 K. ....33

**Table S10** List of Cartesian coordinates of located stationary points at the B3LYP/6-311++G(d,p) in BTF at 376 K. ....34

## Comparison and explanation of methods

The theoretical methods often used in the available computations of NHC-boranes (H-abstraction, addition, cyclization, complexation, *etc.*) are B3LYP<sup>[1]</sup> and M06-2X<sup>[2]</sup> with the 6-31+G(d) – 6-311++G(d,p) basis sets. Another example involved the B3PW91 method<sup>[3]</sup>. Considering of the possible existence of weak interaction or other non-covalent interactions in transition states, we employed the two methods, B3LYP and M06-2X, combined with the 6-311++G(d,p) basis set to obtain the data and results in the original manuscript. Based on the referee's review report, we further tested another two levels of theory, B3LYP-D3BJ/6-311++G(2d,2p) and  $\omega$ B97DX/6-311++G(2d,2p). The results were analyzed along with the B3LYP- and M06-2X-computed results.

As shown in Fig. S19, the results at the B3LYP level have high linear correlations with those at the M06-2X ((a) and (b)), B3LYP-D3BJ ((c) and (d)), and  $\omega$ B97DX ((e) and (f)) levels,  $R^2$  varies in the ranges of 0.88–0.97 for kinetic barriers and 0.98–1.00 for thermodynamic reaction energies, reaction enthalpies, and reaction Gibbs free energies. Clearly, the transition states are more method-dependent than the minimum structures. A similar pattern was reflected in the correlation analysis among the B3LYP-D3BJ-,  $\omega$ B97DX-, and M06-2X-computed results, as shown in Fig. S20.

The results indicate that the M06-2X, B3LYP-D3BJ, and  $\omega$ B97DX methods gave a slightly different ordering of barriers to the H-atom abstractions by those reactant radicals with close nucleophilicity or electrophilicity index from the B3LYP method. Although this difference, we found that the results at the four levels of theory keep good consistence in predicting the statistical correlations of different physical quantities investigated in this study. Furthermore, the B3LYP-D3BJ and  $\omega$ B97DX methods, the newly tested methods, did not improve those correlations relative to the B3LYP and M06-2X methods, but keep consistence with the B3LYP and M06-2X methods. It seems that such a result is closely related to the statistical nature of correlation analysis. Based on the assessment of different methods to the statistical correlations investigated in this study, we described the results using the B3LYP-computed data.

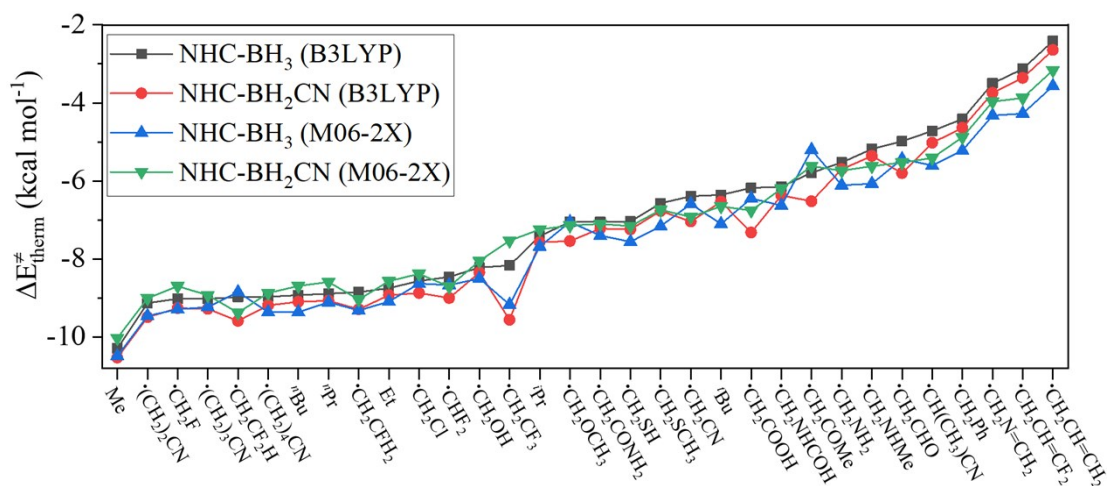

**Figure S1** Thermal contributions ( $\Delta E_{\text{therm}}^{\ddagger}$ ) of the H-abstraction reactions by various radical reactants.

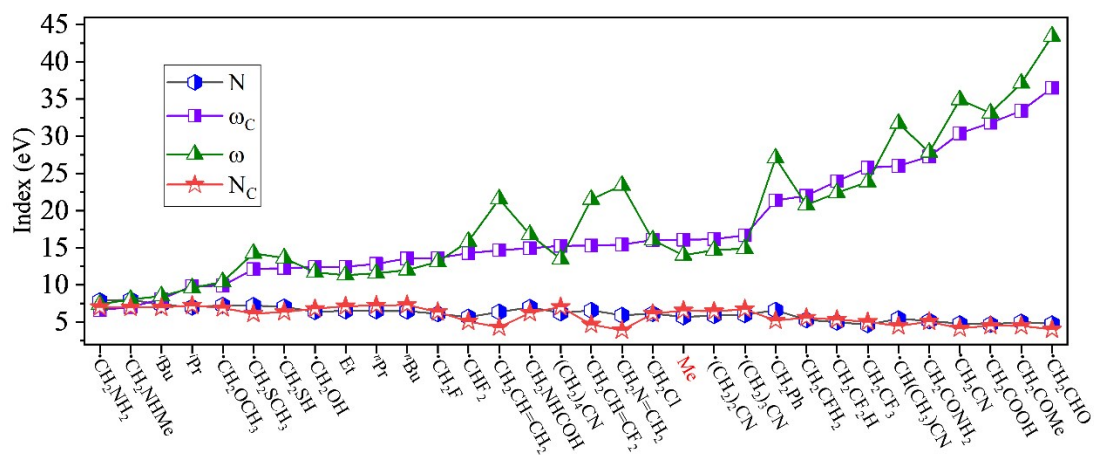

**Figure S2** Global nucleophilic (N) and electrophilic ( $\omega$ ), and local nucleophilic ( $N_C$ ) and electrophilic ( $\omega_C$ ) indexes of radical reactants..

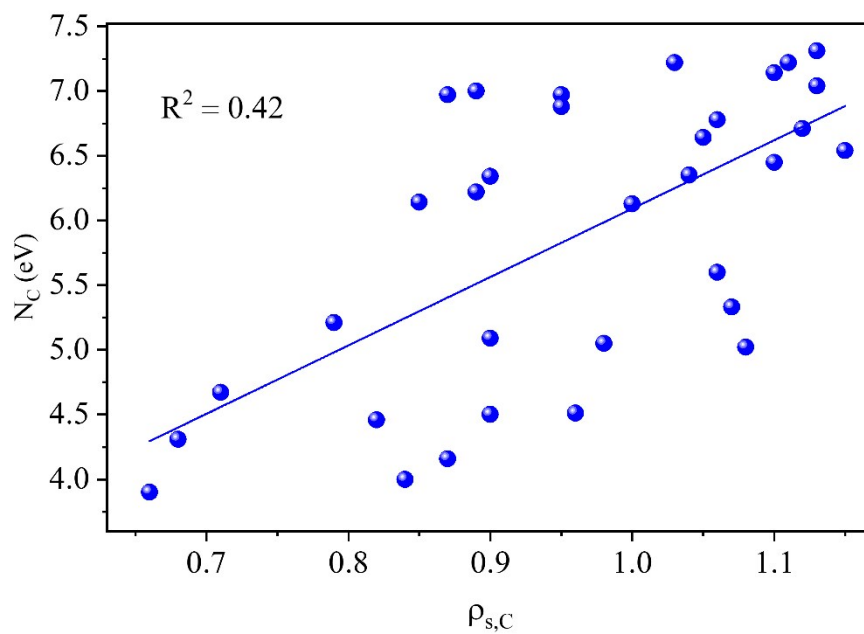

**Figure S3** Plot of local nucleophilic index ( $N_C$ ) vs spin density ( $\rho_C$ ) for the attacking radicals.



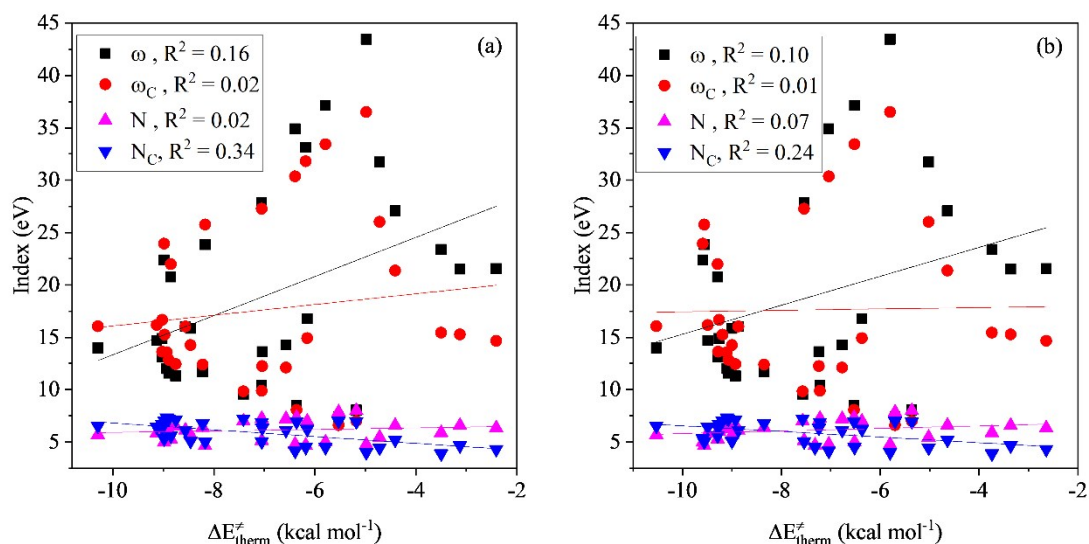

**Figure S4** Global nucleophilic (N) and electrophilic ( $\omega$ ) and local nucleophilic ( $N_C$ ) and electrophilic ( $\omega_C$ ) indexes of radical reactants vs thermal contribution ( $\Delta E_{\text{therm}}^{\ddagger}$ ) for the H-abstraction reactions of NHC-BH<sub>3</sub> (a) and NHC-BH<sub>2</sub>CN (b) by different radicals.

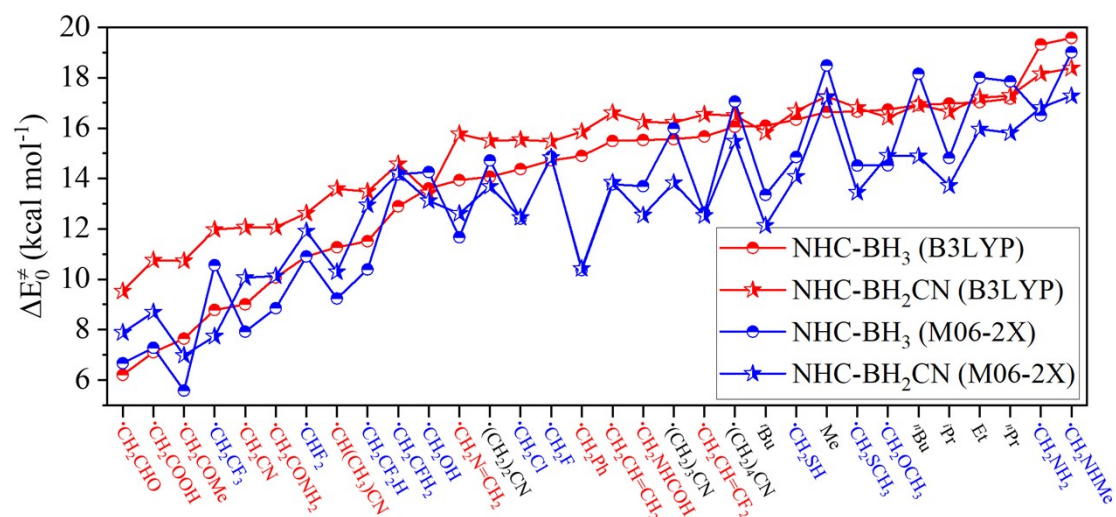

**Figure S5** Intrinsic barrier distribution of the H-abstraction reactions by various radical reactants..

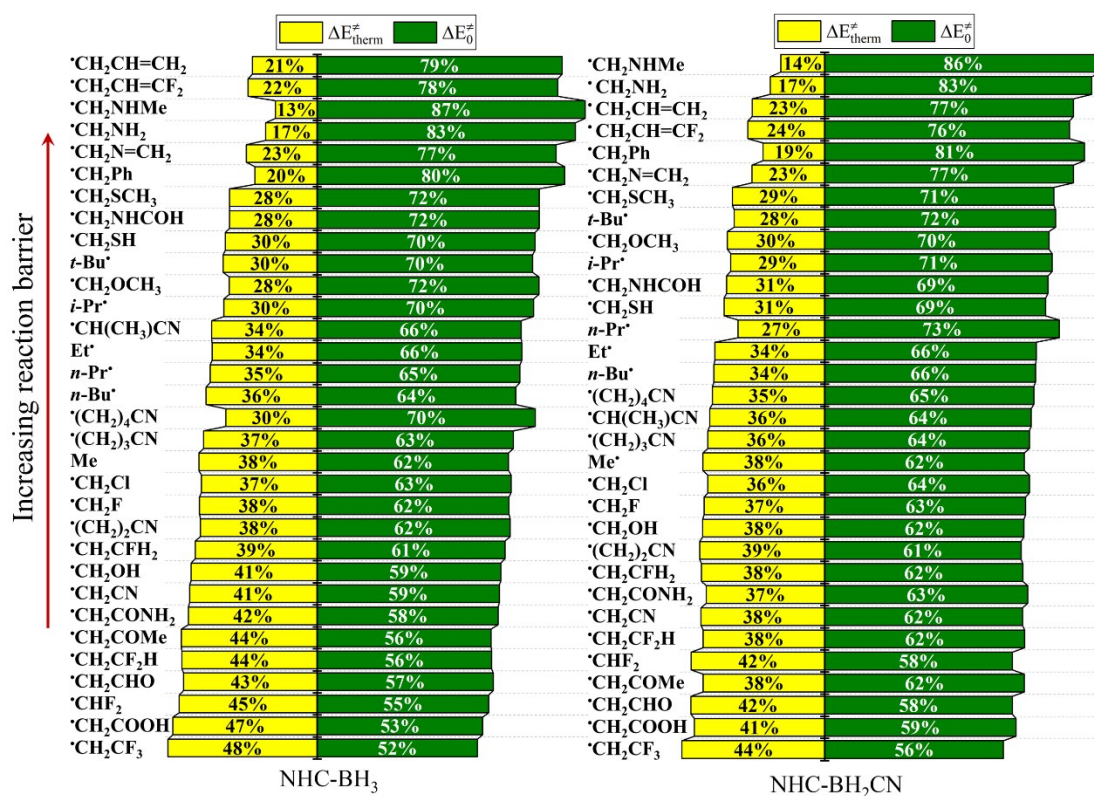

**Figure S6** Change of percentages of intrinsic barrier ( $\Delta E_0^{\ddagger}$ ) and thermal contribution ( $\Delta E_{\text{therm}}^{\ddagger}$ ) in activation barrier ( $\Delta E^{\ddagger}$ ) with increasing activation barrier for the H-abstraction reactions of NHC-BH<sub>3</sub> (a) and NHC-BH<sub>2</sub>CN (b) by different radicals.

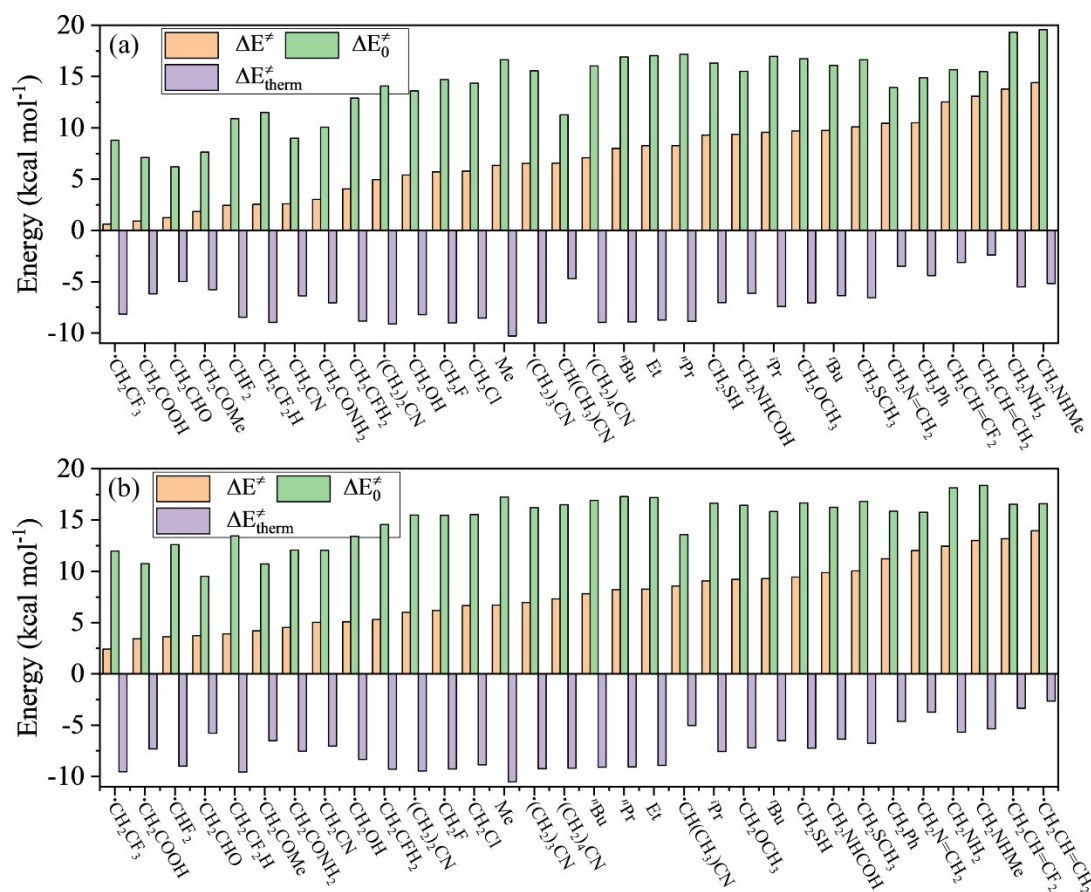

**Figure S7** Histograms of activation barrier ( $\Delta E^{\ddagger}$ ) and its two components, intrinsic barrier ( $\Delta E_0^{\ddagger}$ ) and thermal contribution ( $\Delta E_{\text{therm}}^{\ddagger}$ ) for the H-abstraction reactions of NHC-BH<sub>3</sub> (a) and NHC-BH<sub>2</sub>CN (b) by different radicals.

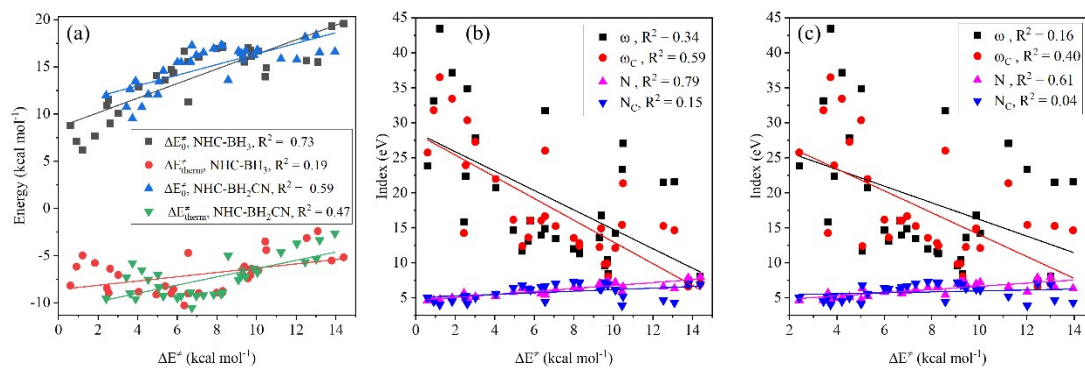

**Figure S8** Linear dependences of activation barrier ( $\Delta E^\ddagger$ ) on intrinsic barrier ( $\Delta E_0^\ddagger$ ) and thermal contribution ( $\Delta E_{\text{therm}}^\ddagger$ ) (a) and plots of nucleophilic/electrophilic indexes vs activation barrier ( $\Delta E^\ddagger$ ) for the H-abstraction reactions of NHC-BH<sub>3</sub> (b) and NHC-BH<sub>2</sub>CN (c).

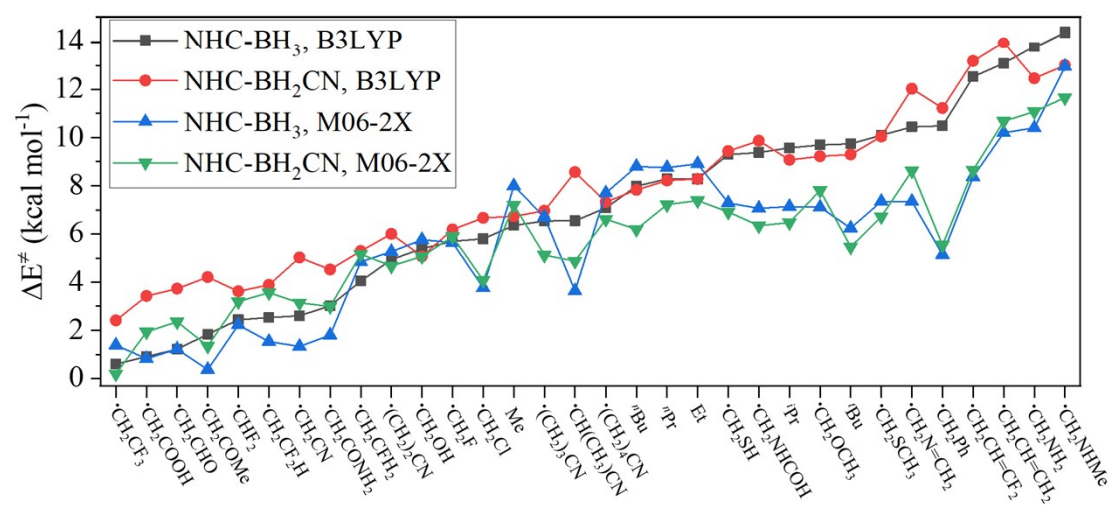

**Figure S9** Activation barriers ( $\Delta E^\ddagger$ ) of the H-abstraction reactions by various radical reactants..





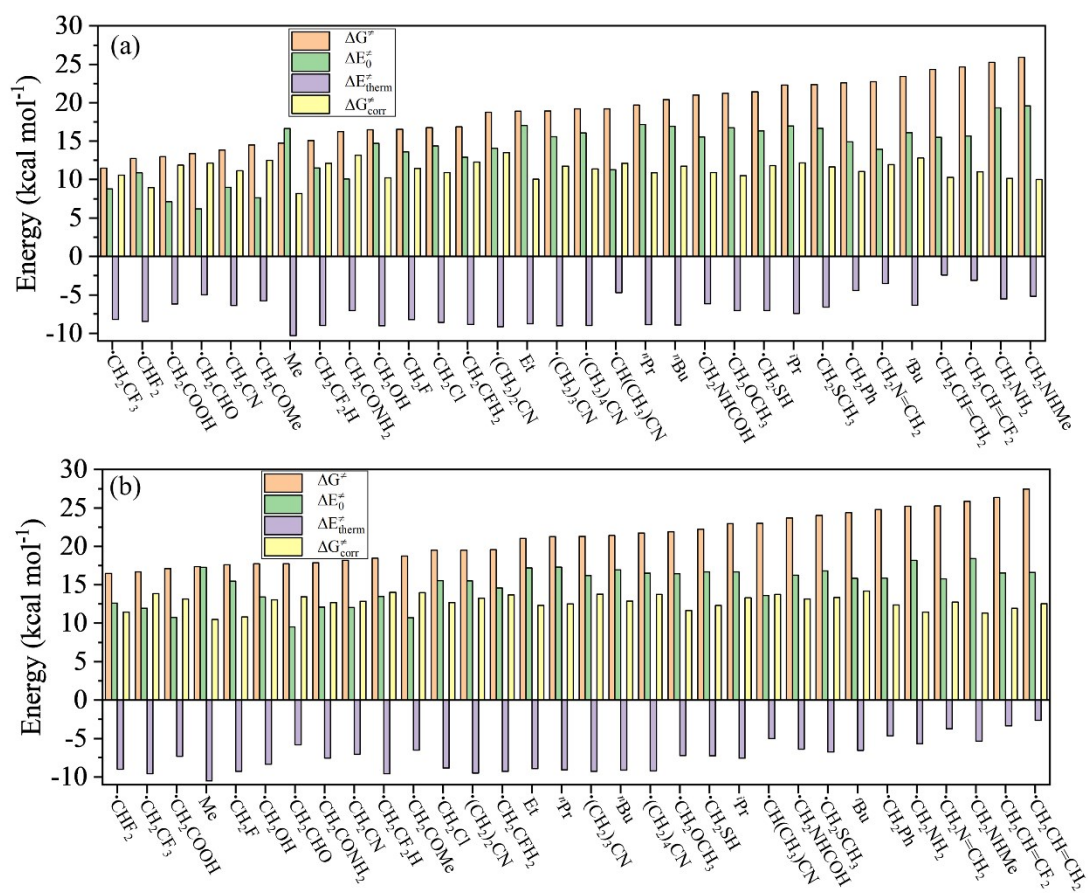

**Figure S11** Bar chart of free energy barrier ( $\Delta G^\ddagger$ ) and its three components, intrinsic barrier ( $\Delta E_0^\ddagger$ ), thermal contribution ( $\Delta E_{\text{therm}}^\ddagger$ ), and activation Gibbs free energy thermal correction ( $\Delta G_{\text{corr}}^\ddagger$ ) for the H-abstraction reactions of NHC-BH<sub>3</sub> (a) and NHC-BH<sub>2</sub>CN (b).

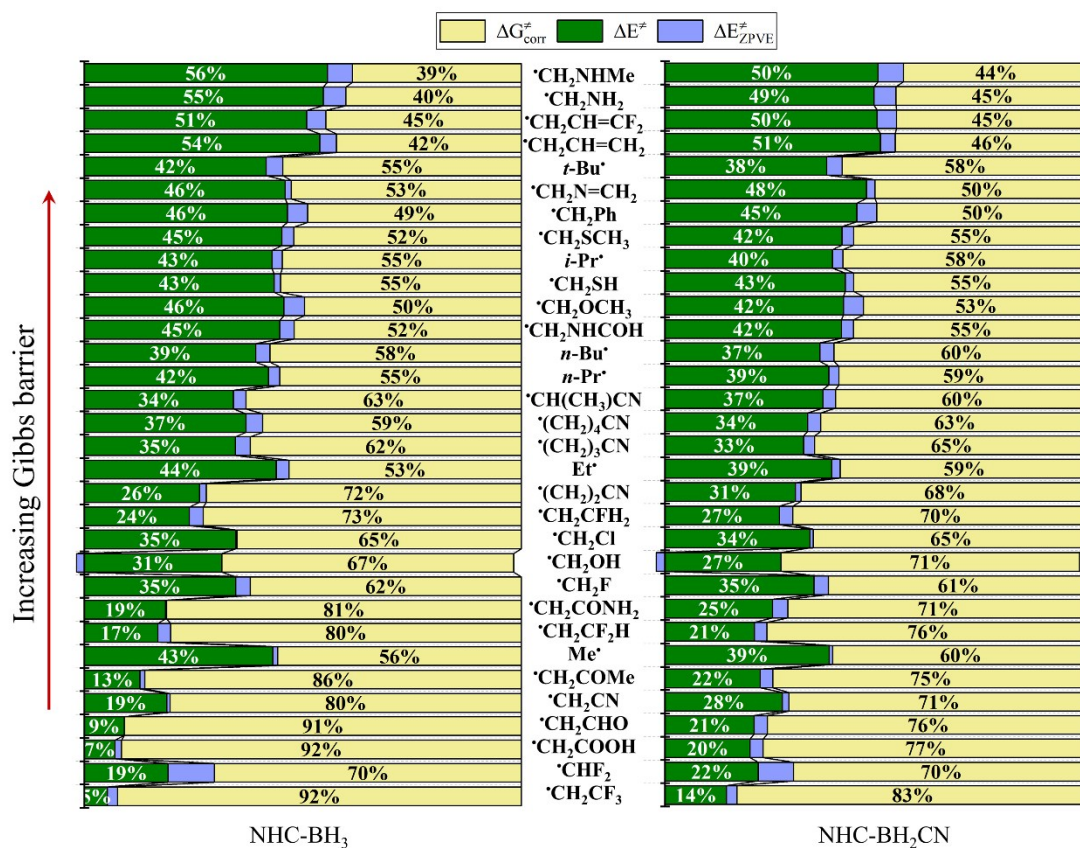

**Figure S12** Percentage stacked column chart of three components, activation barrier ( $\Delta E^\ddagger$ ), activation ZPVE correction ( $\Delta E^\ddagger_{\text{ZPVE}}$ ) and activation Gibbs free energy thermal correction ( $\Delta G^\ddagger_{\text{corr}}$ ), that make up free energy barrier for the H-abstraction reactions of NHC-BH<sub>3</sub> (a) and NHC-BH<sub>2</sub>CN (b).



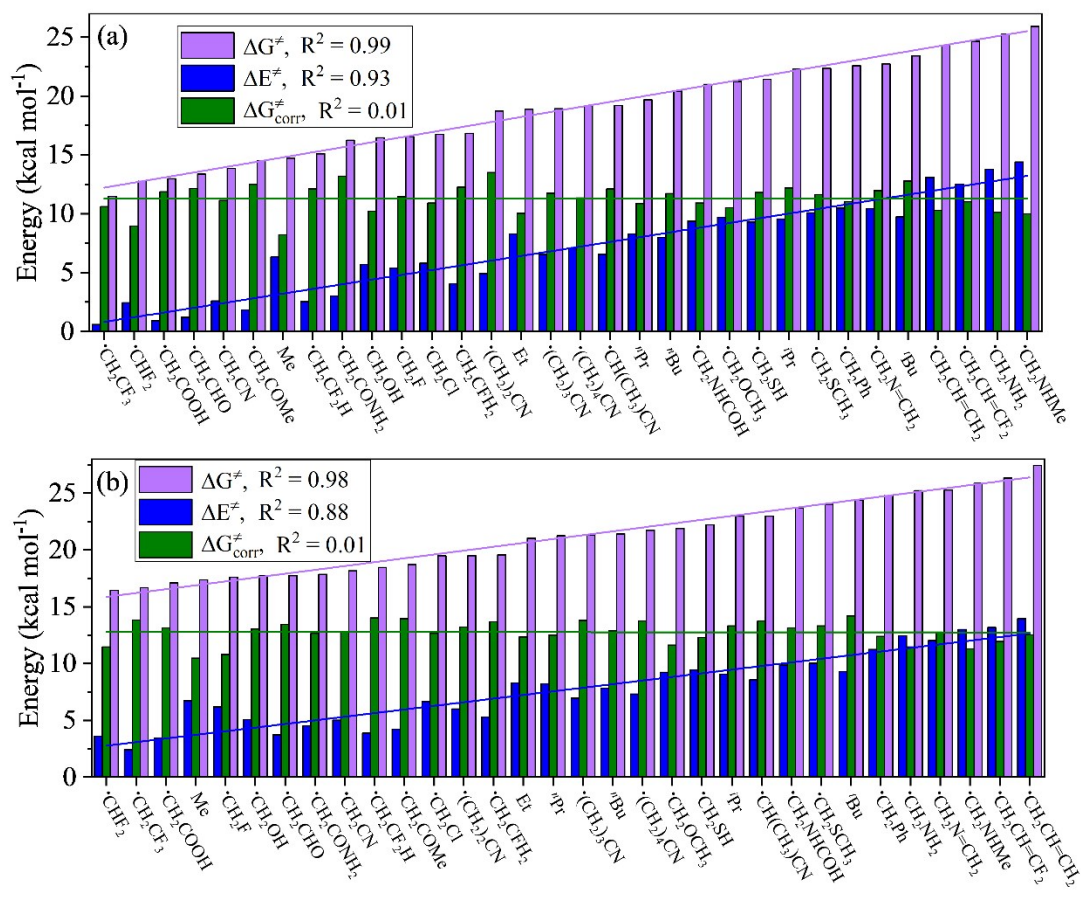

**Figure S13** Bar chart of free energy barrier ( $\Delta G^\ddagger$ ) and its components, activation barrier ( $\Delta E^\ddagger$ ) and activation Gibbs free energy thermal correction ( $\Delta G_{\text{corr}}^\ddagger$ ), for the H-abstraction reactions of NHC-BH<sub>3</sub> (a) and NHC-BH<sub>2</sub>CN (b).

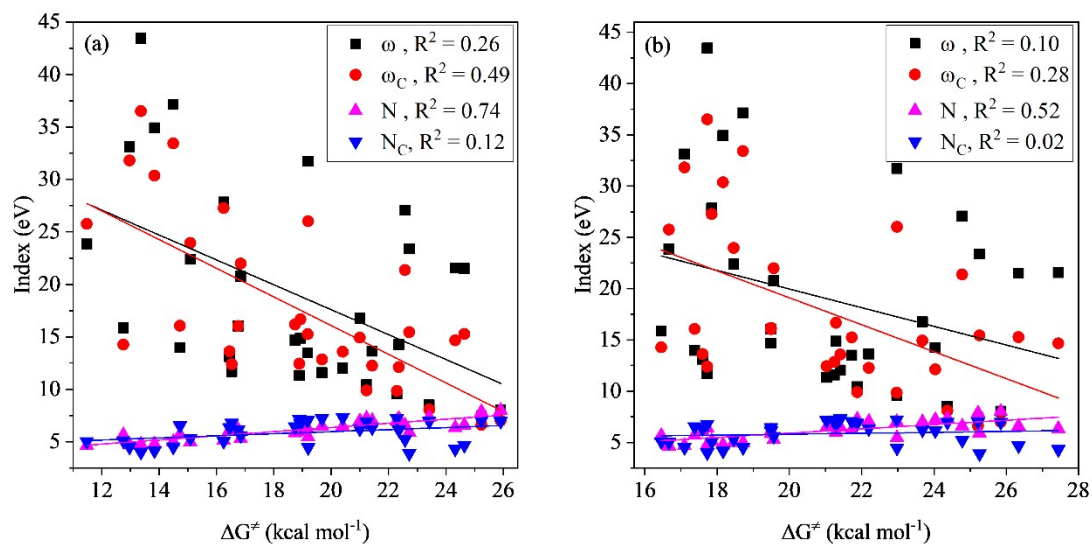

**Figure S14** Plots of global/local nucleophilic and electrophilic indexes of radical reactants vs free energy barriers ( $\Delta G^\ddagger$ ) of H-abstraction reactions of NHC-BH<sub>3</sub> (a) and NHC-BH<sub>2</sub>CN (b).

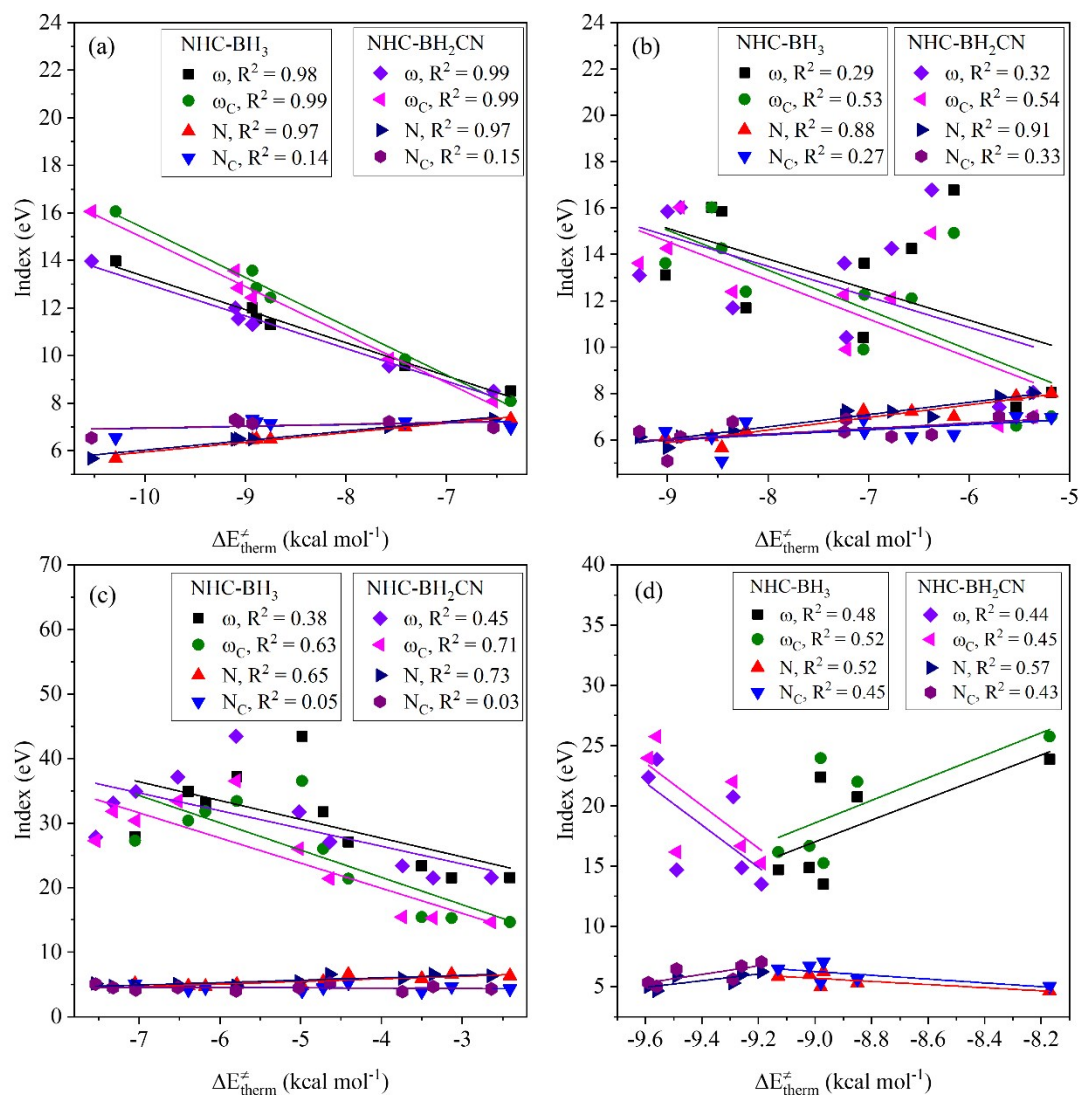

**Figure S15** Analysis of linear dependences of thermal contribution ( $\Delta E_{\text{therm}}^{\ddagger}$ ) on global nucleophilic (N), global electrophilic ( $\omega$ ), local nucleophilic ( $N_C$ ), and local electrophilic ( $\omega_C$ ) indexes for the radicals of types I (a), II (b), III (c), and IV (d).

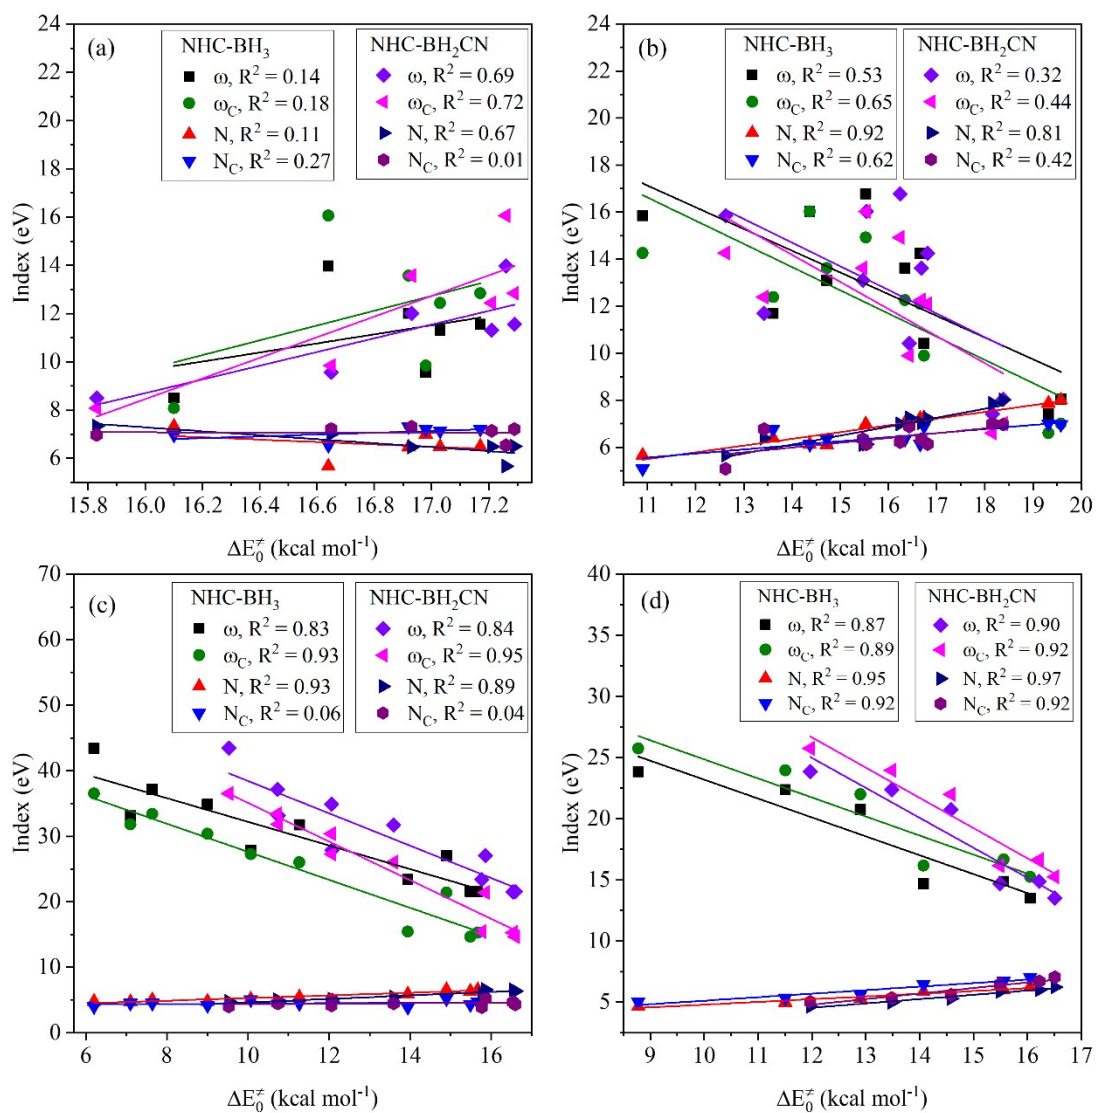

**Figure S16** Analysis of linear dependences of intrinsic barrier ( $\Delta E_0^\ddagger$ ) with global nucleophilic (N), global electrophilic ( $\omega$ ), local nucleophilic (N<sub>C</sub>), and local electrophilic ( $\omega_C$ ) indexes for the radicals of types **I** (a), **II** (b), **III** (c), and **IV** (d).

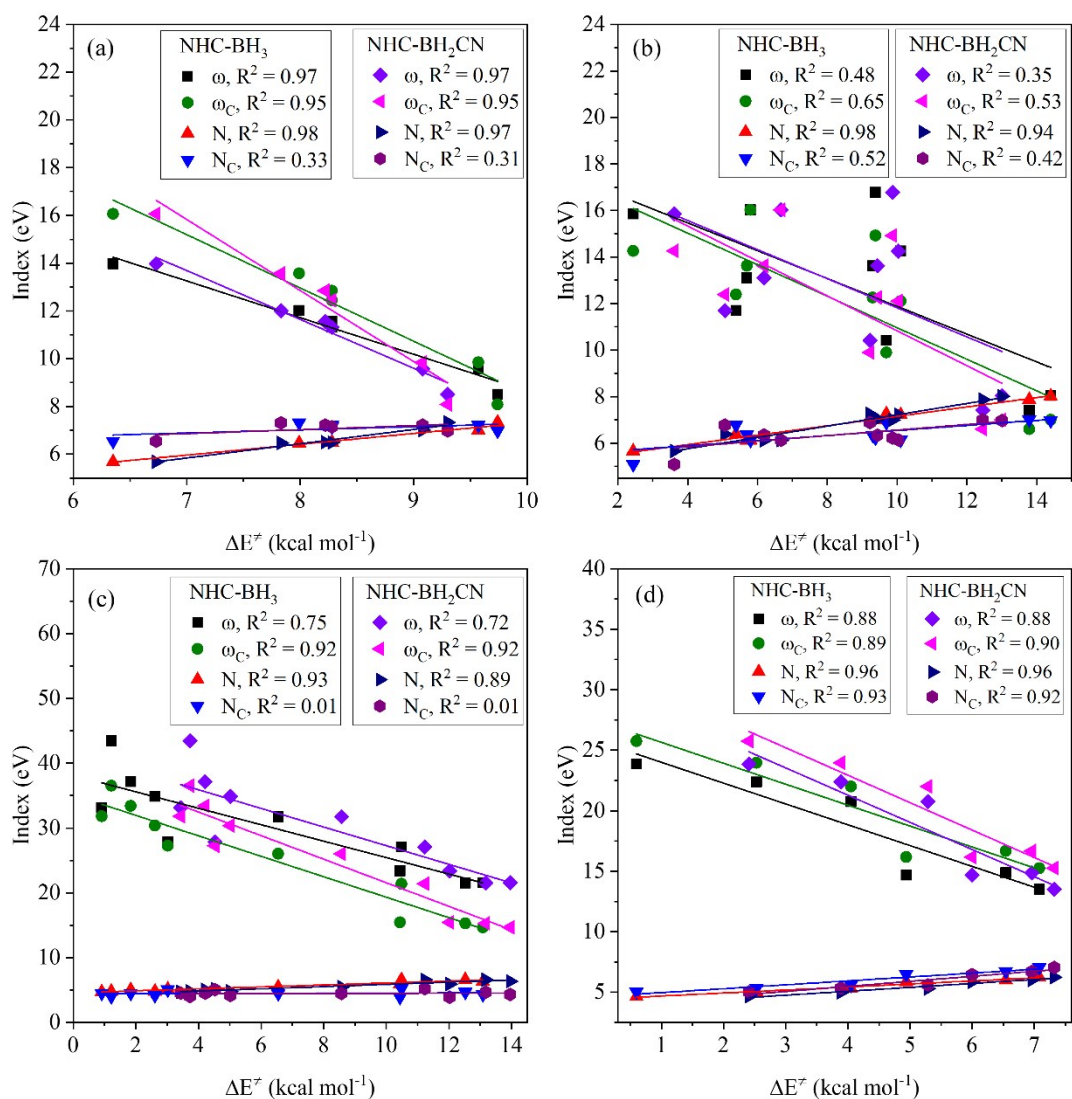

**Figure S17** Analysis of linear dependences of activation barrier ( $\Delta E^\ddagger$ ) with global nucleophilic (N), global electrophilic ( $\omega$ ), local nucleophilic ( $N_C$ ), and local electrophilic ( $\omega_C$ ) indexes for the radicals of types I (a), II (b), III (c), and IV (d).

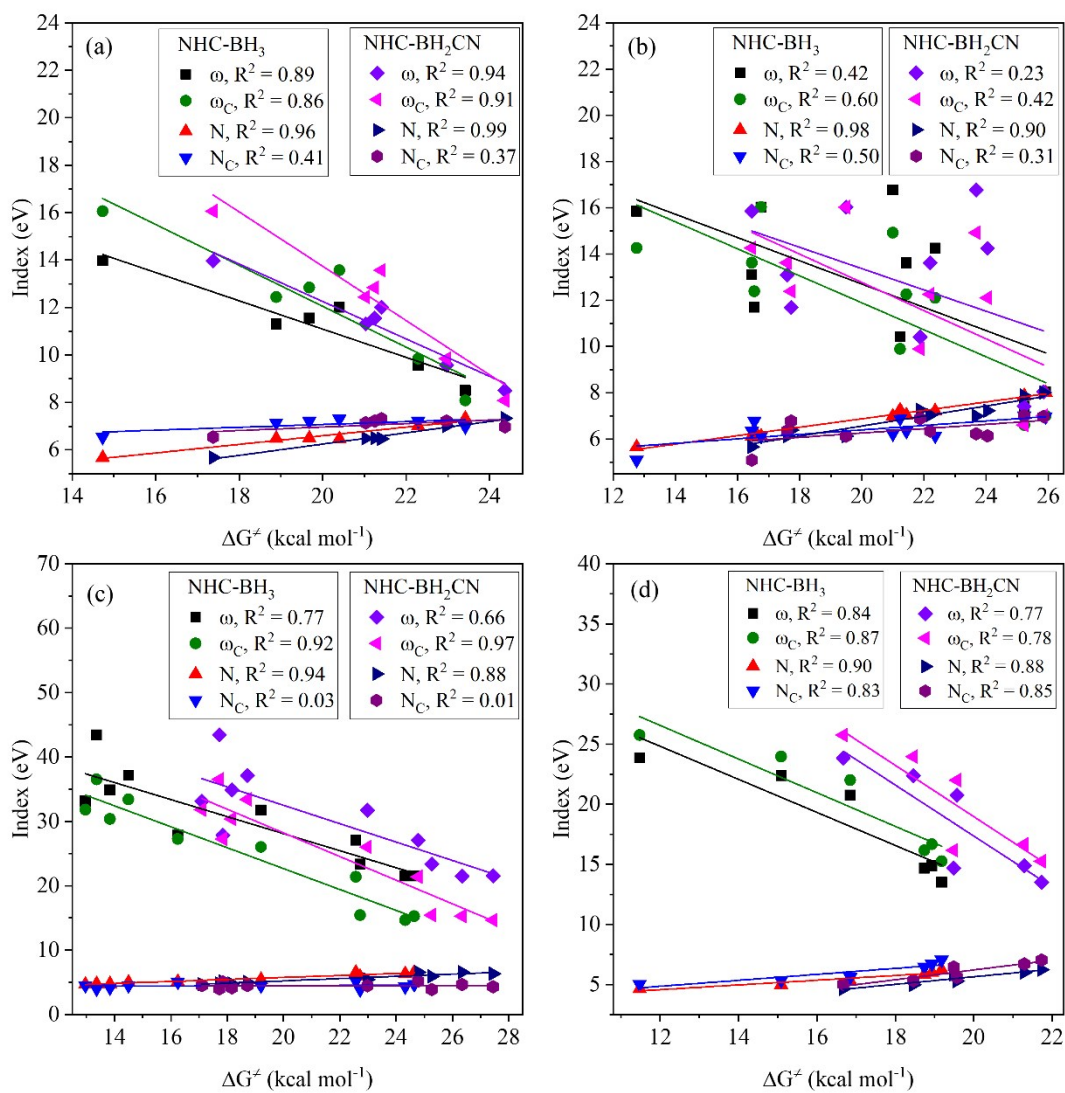

**Figure S18** Analysis of linear dependences of free energy barrier ( $\Delta G^\ddagger$ ) with global nucleophilic (N), global electrophilic ( $\omega$ ), local nucleophilic (N<sub>c</sub>), and local electrophilic ( $\omega_c$ ) indexes for the radicals of types I (a), II (b), III (c), and IV (d).



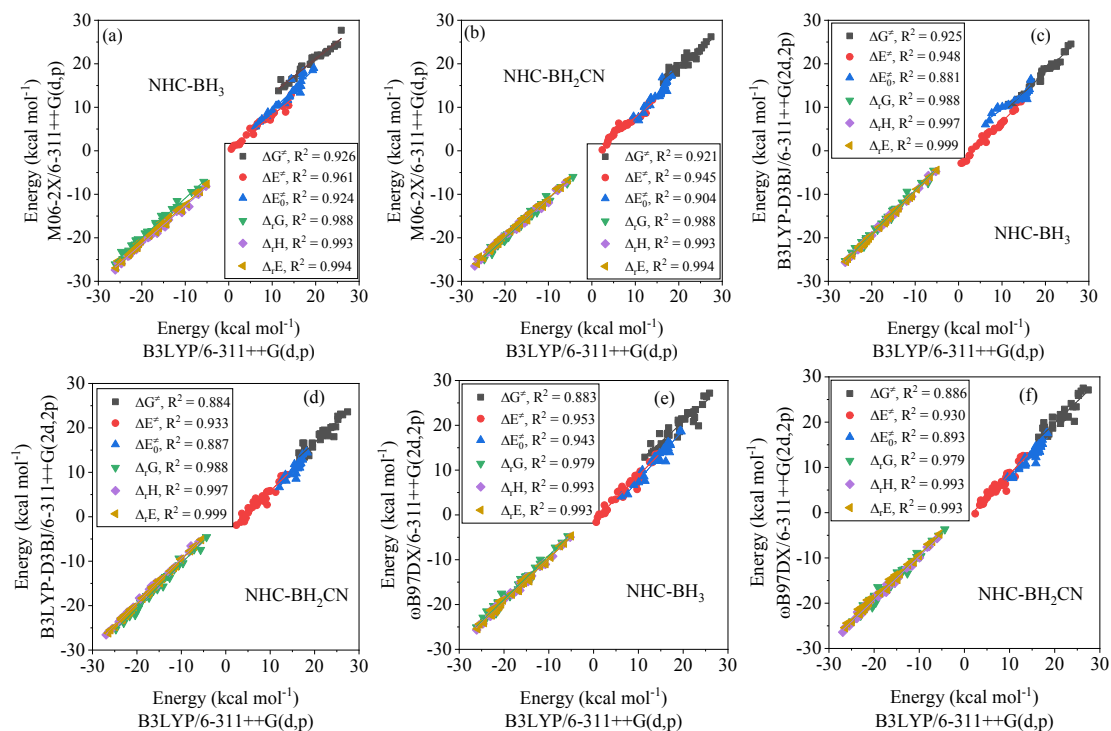

**Figure S19** Correlation analysis of the kinetic and thermodynamic quantities of the H-abstraction reactions computed at the B3LYP/6-311++G(d,p) level with those computed at the B3LYP-D3BJ/6-311++G(2d,2p), ωB97DX/6-311++G(2d,2p), and M06-2X/6-311++G(d,p) levels of theory.

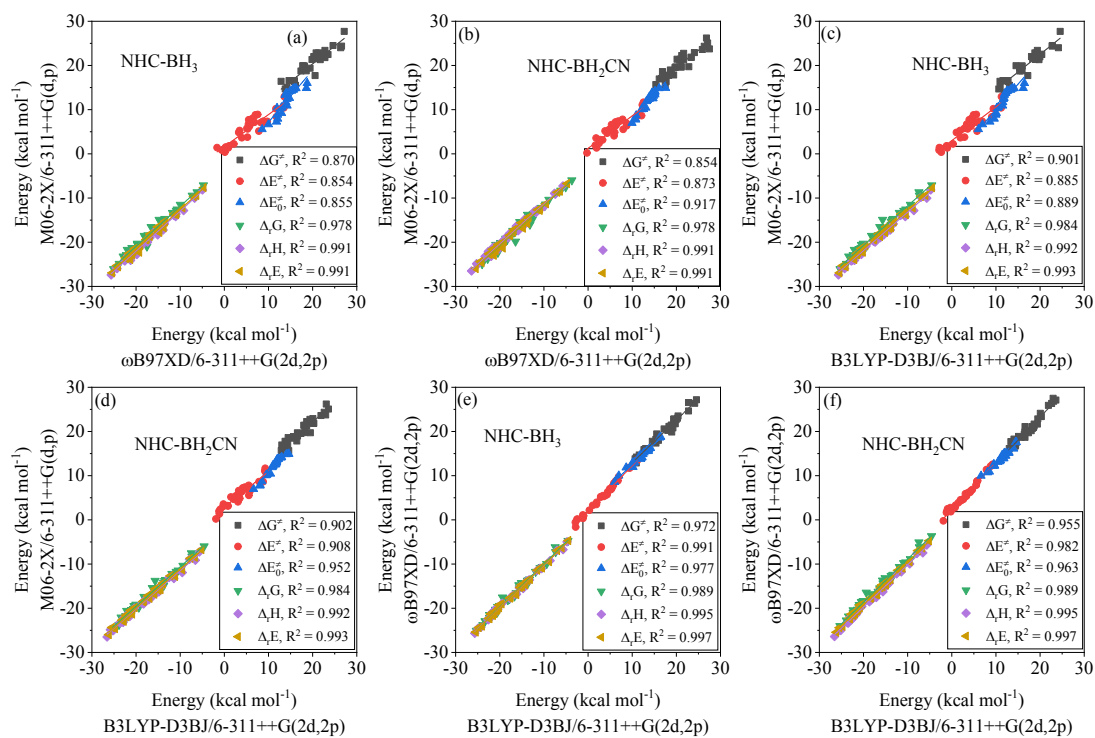

**Figure S20** Correlation analysis of the kinetic and thermodynamic quantities of the H-abstraction reactions computed at the B3LYP-D3BJ/6-311++G(2d,2p), ωB97DX/6-311++G(2d,2p), and M06-2X/6-311++G(d,p).



**Table S1** Total electronic energies (E, hartree), zero-point vibrational energies (ZPVE, hartree/particle), Gibbs free energies (G, hartree), enthalpies (H, hartree), thermal corrections to Gibbs free energy ( $G_{\text{corr}}$ , hartree), and thermal corrections to enthalpy ( $H_{\text{corr}}$ , hartree) of the structures of NHC-boranes, NHC-boryl radicals, and RH optimized at the B3LYP/6-311++G(d,p) in BTF at 376 K.

| Species                                                         | E           | ZPVE     | G           | H           | $G_{\text{corr}}$ | $H_{\text{corr}}$ |
|-----------------------------------------------------------------|-------------|----------|-------------|-------------|-------------------|-------------------|
| NHC-BH <sub>3</sub>                                             | -331.598609 | 0.158913 | -331.484030 | -331.425269 | 0.114579          | 0.173340          |
| NHC-BH <sub>2</sub> CN                                          | -423.905043 | 0.160229 | -423.795270 | -423.727771 | 0.109773          | 0.177272          |
| NHC-•BH <sub>2</sub>                                            | -330.964966 | 0.148261 | -330.862962 | -330.802167 | 0.102004          | 0.162799          |
| NHC-B(•)HCN                                                     | -423.272422 | 0.149815 | -423.171992 | -423.106003 | 0.100429          | 0.166419          |
| CH <sub>3</sub> NH <sub>2</sub>                                 | -95.897929  | 0.063749 | -95.864445  | -95.828249  | 0.033484          | 0.069680          |
| CH <sub>3</sub> CH=CF <sub>2</sub>                              | -316.484166 | 0.064019 | -316.457081 | -316.412112 | 0.027085          | 0.072054          |
| CH <sub>3</sub> CH=CH <sub>2</sub>                              | -117.943653 | 0.078694 | -117.897366 | -117.858640 | 0.046287          | 0.085013          |
| CH(CH <sub>3</sub> ) <sub>3</sub>                               | -158.506768 | 0.130566 | -158.413172 | -158.366466 | 0.093596          | 0.140302          |
| CH <sub>3</sub> N=CH <sub>2</sub>                               | -133.987655 | 0.067831 | -133.952565 | -133.913130 | 0.035090          | 0.074525          |
| CH <sub>3</sub> Ph                                              | -271.641327 | 0.127177 | -271.555484 | -271.503397 | 0.085843          | 0.137930          |
| CH <sub>2</sub> (CH <sub>3</sub> ) <sub>2</sub>                 | -119.181329 | 0.102610 | -119.112854 | -119.070887 | 0.068475          | 0.110441          |
| CH <sub>3</sub> SH                                              | -438.746659 | 0.045838 | -438.732807 | -438.694630 | 0.013852          | 0.052029          |
| CH <sub>3</sub> (CH <sub>2</sub> ) <sub>2</sub> CH <sub>3</sub> | -158.505777 | 0.131047 | -158.412155 | -158.365013 | 0.093622          | 0.140764          |
| CH <sub>3</sub> CH <sub>2</sub> CH <sub>3</sub>                 | -119.181329 | 0.102610 | -119.112854 | -119.070887 | 0.068475          | 0.110441          |
| CH <sub>2</sub> (CH <sub>3</sub> )CN                            | -172.127753 | 0.074022 | -172.089132 | -172.045820 | 0.038621          | 0.081933          |
| CH <sub>3</sub> (CH <sub>2</sub> ) <sub>3</sub> CN              | -250.777106 | 0.130729 | -250.688464 | -250.634495 | 0.088642          | 0.142611          |
| CH <sub>3</sub> (CH <sub>2</sub> ) <sub>2</sub> CN              | -211.452603 | 0.102318 | -211.389053 | -211.340395 | 0.063550          | 0.112208          |
| CH <sub>3</sub> CH <sub>3</sub>                                 | -79.856731  | 0.074104 | -79.813149  | -79.776540  | 0.043582          | 0.080192          |
| CH <sub>3</sub> CH <sub>2</sub> CN                              | -172.127753 | 0.074022 | -172.089132 | -172.045820 | 0.038621          | 0.081933          |
| CH <sub>3</sub> F                                               | -139.794816 | 0.038960 | -139.784071 | -139.750795 | 0.010745          | 0.044021          |
| CH <sub>3</sub> OH                                              | -115.770082 | 0.051011 | -115.749106 | -115.713333 | 0.020976          | 0.056749          |
| CH <sub>4</sub>                                                 | -40.534131  | 0.044375 | -40.512734  | -40.484839  | 0.021397          | 0.049292          |
| CH <sub>3</sub> CN                                              | -132.803769 | 0.045139 | -132.790282 | -132.752464 | 0.013486          | 0.051305          |
| CH <sub>3</sub> CHO                                             | -153.886044 | 0.054893 | -153.863150 | -153.825413 | 0.022894          | 0.060631          |
| CH <sub>3</sub> COOH                                            | -229.170954 | 0.061207 | -229.144045 | -229.103078 | 0.026909          | 0.067876          |
| CH <sub>2</sub> F <sub>2</sub>                                  | -239.070606 | 0.032416 | -239.070483 | -239.032706 | 0.000123          | 0.037900          |
| CH <sub>3</sub> CF <sub>3</sub>                                 | -377.690108 | 0.051636 | -377.675409 | -377.630156 | 0.014699          | 0.059952          |
| CH <sub>3</sub> Cl                                              | -500.154807 | 0.037606 | -500.146974 | -500.111927 | 0.007833          | 0.042880          |
| CH <sub>3</sub> OCH <sub>3</sub>                                | -155.080308 | 0.079196 | -155.034880 | -154.993756 | 0.045428          | 0.086552          |
| CH <sub>3</sub> SCH <sub>3</sub>                                | -478.070095 | 0.075381 | -478.030670 | -477.986537 | 0.039425          | 0.083558          |
| CH <sub>3</sub> NHMe                                            | -135.212683 | 0.091900 | -135.154595 | -135.113244 | 0.058088          | 0.099439          |
| CH <sub>3</sub> NHCOH                                           | -209.280668 | 0.073937 | -209.242695 | -209.198591 | 0.037973          | 0.082077          |
| CH <sub>3</sub> COMe                                            | -193.223673 | 0.083020 | -193.176150 | -193.132895 | 0.047523          | 0.090778          |
| CH <sub>3</sub> CONH <sub>2</sub>                               | -209.299005 | 0.073290 | -209.262444 | -209.217257 | 0.036561          | 0.081748          |
| CH <sub>3</sub> CF <sub>2</sub> H                               | -278.407490 | 0.059916 | -278.382939 | -278.340122 | 0.024551          | 0.067368          |
| CH <sub>3</sub> CFH <sub>2</sub>                                | -179.126891 | 0.067463 | -179.092678 | -179.052737 | 0.034213          | 0.074154          |

**Table S2** Total electronic energies (E, hartree), zero-point vibrational energies (ZPVE, hartree/particle), Gibbs free energies (G, hartree), enthalpies (H, hartree), thermal corrections to Gibbs free energy ( $G_{\text{corr}}$ , hartree), and thermal corrections to enthalpy ( $H_{\text{corr}}$ , hartree) of the structures of the attacking radical R $\cdot$  optimized at the B3LYP/6-311++G(d,p) in BTF at 376 K.

| Species                                 | E           | ZPVE     | G           | H           | $G_{\text{corr}}$ | $H_{\text{corr}}$ |
|-----------------------------------------|-------------|----------|-------------|-------------|-------------------|-------------------|
| $\cdot\text{CH}_2\text{NH}_2$           | -95.241889  | 0.049797 | -95.222676  | -95.186061  | 0.019213          | 0.055828          |
| $\cdot\text{CH}_2\text{CH}=\text{CF}_2$ | -315.837554 | 0.050937 | -315.824789 | -315.777889 | 0.012765          | 0.072054          |
| $\cdot\text{CH}_2\text{CH}=\text{CH}_2$ | -117.299714 | 0.065741 | -117.267183 | -117.227178 | 0.032531          | 0.072536          |
| $\cdot\text{Bu}$                        | -157.846072 | 0.115648 | -157.769752 | -157.720047 | 0.076321          | 0.126026          |
| $\cdot\text{CH}_2\text{N}=\text{CH}_2$  | -133.338363 | 0.053481 | -133.317900 | -133.278244 | 0.020463          | 0.060119          |
| $\cdot\text{CH}_2\text{Ph}$             | -270.989971 | 0.114088 | -270.915484 | -270.865727 | 0.074488          | 0.124245          |
| $\cdot\text{Pr}$                        | -118.515994 | 0.087250 | -118.465036 | -118.420183 | 0.050958          | 0.095811          |
| $\cdot\text{CH}_2\text{SH}$             | -438.083398 | 0.031135 | -438.085822 | -438.045451 | -0.002420         | 0.037947          |
| $\cdot\text{Bu}$                        | -157.834182 | 0.116177 | -157.757574 | -157.707679 | 0.076608          | 0.126503          |
| $\cdot\text{Pr}$                        | -118.509910 | 0.087605 | -118.457793 | -118.414023 | 0.052118          | 0.095888          |
| $\cdot\text{CH}(\text{CH}_3)\text{CN}$  | -171.473467 | 0.059786 | -171.450504 | -171.405552 | 0.022963          | 0.067915          |
| $\cdot(\text{CH}_2)_4\text{CN}$         | -250.104950 | 0.115937 | -250.033139 | -249.976589 | 0.071811          | 0.128361          |
| $\cdot(\text{CH}_2)_3\text{CN}$         | -210.779804 | 0.087401 | -210.733808 | -210.681898 | 0.045996          | 0.097906          |
| Et                                      | -79.185621  | 0.058826 | -79.158902  | -79.120105  | 0.026720          | 0.065516          |
| $\cdot(\text{CH}_2)_2\text{CN}$         | -171.452840 | 0.058623 | -171.431393 | -171.385732 | 0.021447          | 0.067109          |
| $\cdot\text{CH}_2\text{F}$              | -139.121735 | 0.024305 | -139.127406 | -139.092110 | -0.005671         | 0.029625          |
| $\cdot\text{CH}_2\text{OH}$             | -115.099005 | 0.035103 | -115.094104 | -115.058418 | 0.004901          | 0.040587          |
| Me                                      | -39.855770  | 0.029550 | -39.852370  | -39.821029  | 0.003401          | 0.034741          |
| $\cdot\text{CH}_2\text{CN}$             | -132.139999 | 0.030847 | -132.141013 | -132.103102 | -0.001014         | 0.036897          |
| $\cdot\text{CH}_2\text{CHO}$            | -153.228686 | 0.042493 | -153.218992 | -153.180050 | 0.009694          | 0.048636          |
| $\cdot\text{CH}_2\text{COOH}$           | -228.505685 | 0.047944 | -228.493222 | -228.450361 | 0.012463          | 0.055324          |
| $\cdot\text{CHF}_2$                     | -238.397362 | 0.018751 | -238.411431 | -238.373203 | -0.014069         | 0.024159          |
| $\cdot\text{CH}_2\text{CF}_3$           | -377.011042 | 0.036845 | -377.012725 | -376.965454 | -0.001683         | 0.045588          |
| $\cdot\text{CH}_2\text{Cl}$             | -499.483265 | 0.022436 | -499.493153 | -499.454860 | -0.009890         | 0.042880          |
| $\cdot\text{CH}_2\text{OCH}_3$          | -154.417897 | 0.065290 | -154.387158 | -154.345045 | 0.030739          | 0.072852          |
| $\cdot\text{CH}_2\text{SCH}_3$          | -477.409204 | 0.061023 | -477.385380 | -477.339551 | 0.023824          | 0.069653          |
| $\cdot\text{CH}_2\text{NHMe}$           | -134.558203 | 0.078186 | -134.514558 | -134.472272 | 0.043645          | 0.085931          |
| $\cdot\text{CH}_2\text{NHCOH}$          | -208.621437 | 0.059738 | -208.597847 | -208.553471 | 0.023590          | 0.067966          |
| $\cdot\text{CH}_2\text{COMe}$           | -192.562982 | 0.070095 | -192.530397 | -192.484412 | 0.032585          | 0.078570          |
| $\cdot\text{CH}_2\text{CONH}_2$         | -208.632887 | 0.059205 | -208.610732 | -208.565140 | 0.022155          | 0.067747          |
| $\cdot\text{CH}_2\text{CF}_2\text{H}$   | -277.730770 | 0.045151 | -277.723055 | -277.677649 | 0.007715          | 0.053121          |
| $\cdot\text{CH}_2\text{CFH}_2$          | -179.126891 | 0.067463 | -179.092678 | -179.052737 | 0.034213          | 0.060035          |

**Table S3** Spin densities ( $\rho_{s,C}$ ,  $e$ ) on the central C atoms, global nucleophilic (N, eV) and electrophilic indices ( $\omega$ , eV), and local nucleophilic ( $N_C$ , eV) and electrophilic indices ( $\omega_C$ , eV) of the attacking radical R $\cdot$  and NHC-boranes computed at the mpwpw91/6-311+G(d,p) in BTF.

| Species                                 | $\rho_{s,C}$ | $\omega$ | $\omega_C$ | N    | $N_C$ |
|-----------------------------------------|--------------|----------|------------|------|-------|
| $\cdot\text{CH}_2\text{NH}_2$           | 0.89         | 7.41     | 6.60       | 7.87 | 7.00  |
| $\cdot\text{CH}_2\text{CH}=\text{CF}_2$ | 0.71         | 21.50    | 15.27      | 6.58 | 4.67  |
| $\cdot\text{CH}_2\text{CH}=\text{CH}_2$ | 0.68         | 21.56    | 14.66      | 6.34 | 4.31  |
| $^t\text{Bu}$                           | 0.95         | 8.50     | 8.08       | 7.33 | 6.97  |
| $\cdot\text{CH}_2\text{N}=\text{CH}_2$  | 0.66         | 23.38    | 15.43      | 5.91 | 3.90  |
| $\cdot\text{CH}_2\text{Ph}$             | 0.79         | 27.05    | 21.37      | 6.59 | 5.21  |
| $^i\text{Pr}$                           | 1.03         | 9.57     | 9.85       | 7.01 | 7.22  |
| $\cdot\text{CH}_2\text{SH}$             | 0.90         | 13.62    | 12.26      | 7.04 | 6.34  |
| $^n\text{Bu}$                           | 1.13         | 12.01    | 13.57      | 6.47 | 7.31  |
| $^n\text{Pr}$                           | 1.11         | 11.56    | 12.84      | 6.50 | 7.22  |
| $\cdot\text{CH}(\text{CH}_3)\text{CN}$  | 0.82         | 31.72    | 26.01      | 5.44 | 4.46  |
| $\cdot(\text{CH}_2)_4\text{CN}$         | 1.13         | 13.49    | 15.24      | 6.23 | 7.04  |
| $\cdot(\text{CH}_2)_3\text{CN}$         | 1.12         | 14.88    | 16.66      | 5.99 | 6.71  |
| Et                                      | 1.10         | 11.31    | 12.44      | 6.49 | 7.14  |
| $\cdot(\text{CH}_2)_2\text{CN}$         | 1.10         | 14.69    | 16.16      | 5.86 | 6.45  |
| $\cdot\text{CH}_2\text{F}$              | 1.04         | 13.10    | 13.62      | 6.11 | 6.35  |
| $\cdot\text{CH}_2\text{OH}$             | 1.06         | 11.69    | 12.39      | 6.39 | 6.78  |
| Me                                      | 1.15         | 13.97    | 16.06      | 5.68 | 6.54  |
| $\cdot\text{CH}_2\text{CN}$             | 0.87         | 34.90    | 30.37      | 4.78 | 4.16  |
| $\cdot\text{CH}_2\text{CHO}$            | 0.84         | 43.45    | 36.50      | 4.77 | 4.00  |
| $\cdot\text{CH}_2\text{COOH}$           | 0.96         | 33.13    | 31.81      | 4.69 | 4.51  |
| $\cdot\text{CHF}_2$                     | 0.90         | 15.85    | 14.26      | 5.66 | 5.09  |
| $\cdot\text{CH}_2\text{CF}_3$           | 1.08         | 23.85    | 25.76      | 4.65 | 5.02  |
| $\cdot\text{CH}_2\text{Cl}$             | 1.00         | 16.03    | 16.03      | 6.13 | 6.13  |
| $\cdot\text{CH}_2\text{OCH}_3$          | 0.95         | 10.42    | 9.90       | 7.25 | 6.88  |
| $\cdot\text{CH}_2\text{SCH}_3$          | 0.85         | 14.25    | 12.11      | 7.22 | 6.14  |
| $\cdot\text{CH}_2\text{NHMe}$           | 0.87         | 8.04     | 7.00       | 8.01 | 6.97  |
| $\cdot\text{CH}_2\text{NHCOH}$          | 0.89         | 16.77    | 14.92      | 6.99 | 6.22  |
| $\cdot\text{CH}_2\text{COMe}$           | 0.90         | 37.13    | 33.42      | 5.00 | 4.50  |
| $\cdot\text{CH}_2\text{CONH}_2$         | 0.98         | 27.83    | 27.27      | 5.15 | 5.05  |
| $\cdot\text{CH}_2\text{CF}_2\text{H}$   | 1.07         | 22.38    | 23.95      | 4.98 | 5.33  |
| $\cdot\text{CH}_2\text{CFH}_2$          | 1.06         | 20.75    | 21.99      | 5.29 | 5.60  |
| NHC-BH $_3$                             | /            | 4.61     | /          | 5.39 | /     |
| NHC-BH $_2$ CN                          | /            | 6.14     | /          | 4.84 | /     |

**Table S4** Total electronic energies (E, hartree), zero-point vibrational energies (ZPVE, hartree/particle), Gibbs free energies (G, hartree), enthalpies (H, hartree), thermal corrections to Gibbs free energy ( $G_{\text{corr}}$ , hartree), and thermal corrections to enthalpy ( $H_{\text{corr}}$ , hartree) of the transition states (TS) of the H-atom abstraction reactions of NHC-BH<sub>3</sub> by R<sup>•</sup> optimized at the B3LYP/6-311++G(d,p) in BTF at 376 K.

| TS   | R <sup>•</sup>                                  | E           | ZPVE     | G           | H           | $G_{\text{corr}}$ | $H_{\text{corr}}$ |
|------|-------------------------------------------------|-------------|----------|-------------|-------------|-------------------|-------------------|
| TS1  | <sup>•</sup> CH <sub>2</sub> NH <sub>2</sub>    | -426.816451 | 0.206641 | -426.666498 | -426.588998 | 0.149953          | 0.227453          |
| TS2  | <sup>•</sup> CH <sub>2</sub> CH=CF <sub>2</sub> | -647.414469 | 0.208130 | -647.269559 | -647.182587 | 0.144910          | 0.231882          |
| TS3  | <sup>•</sup> CH <sub>2</sub> CH=CH <sub>2</sub> | -448.875976 | 0.223163 | -448.712458 | -448.631106 | 0.163518          | 0.244870          |
| TS4  | <sup>t</sup> Bu                                 | -489.427749 | 0.273155 | -489.216453 | -489.129628 | 0.211296          | 0.298120          |
| TS5  | <sup>•</sup> CH <sub>2</sub> N=CH <sub>2</sub>  | -464.919843 | 0.211902 | -464.765727 | -464.686783 | 0.154116          | 0.233060          |
| TS6  | <sup>•</sup> CH <sub>2</sub> Ph                 | -602.570213 | 0.271349 | -602.363553 | -602.273572 | 0.206660          | 0.296641          |
| TS7  | <sup>i</sup> Pr                                 | -450.098514 | 0.245329 | -449.913550 | -449.830261 | 0.184964          | 0.268253          |
| TS8  | <sup>•</sup> CH <sub>2</sub> SH                 | -769.666686 | 0.189545 | -769.535709 | -769.456322 | 0.130977          | 0.210364          |
| TS9  | <sup>n</sup> Bu                                 | -489.418979 | 0.274016 | -489.209102 | -489.120144 | 0.209877          | 0.298835          |
| TS10 | <sup>n</sup> Pr                                 | -450.094485 | 0.245685 | -449.910453 | -449.825982 | 0.184032          | 0.268503          |
| TS11 | <sup>•</sup> CH(CH <sub>3</sub> )CN             | -503.060776 | 0.217839 | -502.903934 | -502.820144 | 0.156842          | 0.240632          |
| TS12 | <sup>•</sup> (CH <sub>2</sub> ) <sub>4</sub> CN | -581.691095 | 0.273669 | -581.486598 | -581.390428 | 0.204497          | 0.300667          |
| TS13 | <sup>•</sup> (CH <sub>2</sub> ) <sub>3</sub> CN | -542.366977 | 0.245301 | -542.187677 | -542.096651 | 0.179300          | 0.270326          |
| TS14 | Et                                              | -410.770134 | 0.216844 | -410.612824 | -410.532177 | 0.157310          | 0.237957          |
| TS15 | <sup>•</sup> (CH <sub>2</sub> ) <sub>2</sub> CN | -503.043135 | 0.217095 | -502.885557 | -502.804212 | 0.157577          | 0.238922          |
| TS16 | <sup>•</sup> CH <sub>2</sub> F                  | -470.710394 | 0.182348 | -470.585206 | -470.508367 | 0.125188          | 0.202027          |
| TS17 | <sup>•</sup> CH <sub>2</sub> OH                 | -446.689513 | 0.194501 | -446.551776 | -446.474732 | 0.137737          | 0.214781          |
| TS18 | Me                                              | -371.443995 | 0.188197 | -371.312926 | -371.236539 | 0.131069          | 0.207456          |
| TS19 | <sup>•</sup> CH <sub>2</sub> CN                 | -463.734286 | 0.189598 | -463.602989 | -463.524024 | 0.131297          | 0.210262          |
| TS20 | <sup>•</sup> CH <sub>2</sub> CHO                | -484.825349 | 0.201410 | -484.681719 | -484.603283 | 0.143630          | 0.222066          |
| TS21 | <sup>•</sup> CH <sub>2</sub> COOH               | -560.102537 | 0.206555 | -559.956590 | -559.873860 | 0.145947          | 0.228677          |
| TS22 | <sup>•</sup> CHF <sub>2</sub>                   | -569.989924 | 0.175505 | -569.875130 | -569.793906 | 0.114794          | 0.196018          |
| TS23 | <sup>•</sup> CH <sub>2</sub> CF <sub>3</sub>    | -708.608259 | 0.195327 | -708.478465 | -708.389448 | 0.129794          | 0.218811          |
| TS24 | <sup>•</sup> CH <sub>2</sub> Cl                 | -831.072538 | 0.181262 | -830.950469 | -830.871258 | 0.122069          | 0.201280          |
| TS25 | <sup>•</sup> CH <sub>2</sub> OCH <sub>3</sub>   | -485.999459 | 0.222603 | -485.837356 | -485.754702 | 0.162103          | 0.244757          |
| TS26 | <sup>•</sup> CH <sub>2</sub> SCH <sub>3</sub>   | -808.990728 | 0.218940 | -808.833774 | -808.748789 | 0.156954          | 0.241939          |
| TS27 | <sup>•</sup> CH <sub>2</sub> NHMe               | -466.131480 | 0.234713 | -465.957303 | -465.874083 | 0.174177          | 0.257397          |
| TS28 | <sup>•</sup> CH <sub>2</sub> NHCOH              | -540.203977 | 0.217536 | -540.048413 | -539.963665 | 0.155564          | 0.240312          |
| TS29 | <sup>•</sup> CH <sub>2</sub> COMe               | -524.158408 | 0.228758 | -523.991320 | -523.906571 | 0.167088          | 0.251837          |
| TS30 | <sup>•</sup> CH <sub>2</sub> CONH <sub>2</sub>  | -540.226637 | 0.218068 | -540.068869 | -539.985794 | 0.157768          | 0.240843          |
| TS31 | <sup>•</sup> CH <sub>2</sub> CF <sub>2</sub> H  | -609.324635 | 0.203358 | -609.183038 | -609.098829 | 0.141597          | 0.225806          |
| TS32 | <sup>•</sup> CH <sub>2</sub> CFH <sub>2</sub>   | -510.044323 | 0.210797 | -509.894053 | -509.811809 | 0.150270          | 0.232514          |

**Table S5** Total electronic energies (E, hartree), zero-point vibrational energies (ZPVE, hartree/particle), Gibbs free energies (G, hartree), enthalpies (H, hartree), thermal corrections to Gibbs free energy ( $G_{\text{corr}}$ , hartree), and thermal corrections to enthalpy ( $H_{\text{corr}}$ , hartree) of the transition states (TS) of the H-atom abstraction reactions of NHC-BH<sub>2</sub>CN by R<sup>•</sup> optimized at the B3LYP/6-311++G(d,p) in BTF at 376 K.

| TS   | R <sup>•</sup>                                  | E           | ZPVE     | G           | H           | $G_{\text{cor}}$ | $H_{\text{cor}}$ |
|------|-------------------------------------------------|-------------|----------|-------------|-------------|------------------|------------------|
| TS33 | <sup>•</sup> CH <sub>2</sub> NH <sub>2</sub>    | -519.125015 | 0.207962 | -518.977746 | -518.893853 | 0.147269         | 0.231162         |
| TS34 | <sup>•</sup> CH <sub>2</sub> CH=CF <sub>2</sub> | -739.719650 | 0.209222 | -739.578081 | -739.484207 | 0.141569         | 0.235443         |
| TS35 | <sup>•</sup> CH <sub>2</sub> CH=CH <sub>2</sub> | -541.180978 | 0.224435 | -541.018726 | -540.932483 | 0.162252         | 0.248495         |
| TS36 | <sup>t</sup> Bu                                 | -581.734877 | 0.274458 | -581.526187 | -581.432960 | 0.208690         | 0.301917         |
| TS37 | <sup>•</sup> CH <sub>2</sub> N=CH <sub>2</sub>  | -557.223429 | 0.212907 | -557.072909 | -556.986858 | 0.150520         | 0.236571         |
| TS38 | <sup>•</sup> CH <sub>2</sub> Ph                 | -694.875263 | 0.272455 | -694.671260 | -694.575075 | 0.204003         | 0.300187         |
| TS39 | <sup>i</sup> Pr                                 | -542.405651 | 0.246565 | -542.223707 | -542.133730 | 0.181944         | 0.271922         |
| TS40 | <sup>•</sup> CH <sub>2</sub> SH                 | -861.972673 | 0.190635 | -861.845716 | -861.758754 | 0.126957         | 0.213919         |
| TS41 | <sup>n</sup> Bu                                 | -581.725623 | 0.275282 | -581.518726 | -581.423130 | 0.206897         | 0.302493         |
| TS42 | <sup>n</sup> Pr                                 | -542.401037 | 0.247025 | -542.219205 | -542.128820 | 0.181832         | 0.272217         |
| TS43 | <sup>•</sup> CH(CH <sub>3</sub> )CN             | -595.363769 | 0.218935 | -595.209157 | -595.119649 | 0.154612         | 0.244120         |
| TS44 | <sup>•</sup> (CH <sub>2</sub> ) <sub>4</sub> CN | -673.997262 | 0.275096 | -673.793775 | -673.692873 | 0.203487         | 0.304389         |
| TS45 | <sup>•</sup> (CH <sub>2</sub> ) <sub>3</sub> CN | -634.672876 | 0.246742 | -634.495149 | -634.398858 | 0.177727         | 0.274018         |
| TS46 | Et                                              | -503.076804 | 0.218388 | -502.920661 | -502.835111 | 0.156142         | 0.241693         |
| TS47 | <sup>•</sup> (CH <sub>2</sub> ) <sub>2</sub> CN | -595.347909 | 0.218434 | -595.195599 | -595.104170 | 0.152309         | 0.243738         |
| TS48 | <sup>•</sup> CH <sub>2</sub> F                  | -563.015949 | 0.183576 | -562.894630 | -562.810329 | 0.121319         | 0.205620         |
| TS49 | <sup>•</sup> CH <sub>2</sub> OH                 | -538.996589 | 0.195951 | -538.861122 | -538.778019 | 0.135467         | 0.218570         |
| TS50 | Me                                              | -463.749830 | 0.189518 | -463.619946 | -463.538794 | 0.129884         | 0.211036         |
| TS51 | <sup>•</sup> CH <sub>2</sub> CN                 | -556.036572 | 0.190610 | -555.907333 | -555.823012 | 0.129239         | 0.213560         |
| TS52 | <sup>•</sup> CH <sub>2</sub> CHO                | -577.126905 | 0.201845 | -576.986001 | -576.901966 | 0.140904         | 0.224939         |
| TS53 | <sup>•</sup> CH <sub>2</sub> COOH               | -652.404420 | 0.207333 | -652.261248 | -652.172624 | 0.143172         | 0.231796         |
| TS54 | <sup>•</sup> CHF <sub>2</sub>                   | -662.294432 | 0.176776 | -662.180464 | -662.094908 | 0.113968         | 0.199524         |
| TS55 | <sup>•</sup> CH <sub>2</sub> CF <sub>3</sub>    | -800.911570 | 0.196397 | -800.781436 | -800.689513 | 0.130134         | 0.222057         |
| TS56 | <sup>•</sup> CH <sub>2</sub> Cl                 | -923.377425 | 0.182407 | -923.257367 | -923.172672 | 0.120058         | 0.204753         |
| TS57 | <sup>•</sup> CH <sub>2</sub> OCH <sub>3</sub>   | -578.306604 | 0.223870 | -578.147563 | -578.058139 | 0.159041         | 0.248465         |
| TS58 | <sup>•</sup> CH <sub>2</sub> SCH <sub>3</sub>   | -901.297163 | 0.220172 | -901.142345 | -901.051595 | 0.154818         | 0.245568         |
| TS59 | <sup>•</sup> CH <sub>2</sub> NHMe               | -558.440044 | 0.235952 | -558.268637 | -558.178875 | 0.171407         | 0.261169         |
| TS60 | <sup>•</sup> CH <sub>2</sub> NHCOH              | -632.509691 | 0.218903 | -632.355387 | -632.265700 | 0.154304         | 0.243991         |
| TS61 | <sup>•</sup> CH <sub>2</sub> COMe               | -616.460429 | 0.229441 | -616.295831 | -616.205469 | 0.164598         | 0.254960         |
| TS62 | <sup>•</sup> CH <sub>2</sub> CONH <sub>2</sub>  | -632.529673 | 0.218396 | -632.377556 | -632.285622 | 0.152117         | 0.244051         |
| TS63 | <sup>•</sup> CH <sub>2</sub> CF <sub>2</sub> H  | -701.628736 | 0.204503 | -701.488902 | -701.399456 | 0.139834         | 0.229280         |
| TS64 | <sup>•</sup> CH <sub>2</sub> CFH <sub>2</sub>   | -602.348647 | 0.211989 | -602.200958 | -602.112573 | 0.147689         | 0.236074         |

**Table S6** Activation barrier ( $\Delta E^\ddagger$ ), activation zero-point vibrational energy correction ( $\Delta E_{\text{ZPVE}}^\ddagger$ ), intrinsic barrier ( $\Delta E_0^\ddagger$ ), thermal contribution ( $\Delta E_{\text{therm}}^\ddagger$ ), activation Gibbs free energy correction ( $\Delta G_{\text{corr}}^\ddagger$ ), and Gibbs free energy barrier ( $\Delta G^\ddagger$ ) of the H-atom abstraction reactions of NHC-BH<sub>3</sub> by R<sup>•</sup> computed at the B3LYP/6-311++G(d,p) in BTF at 376 K. All units are in kcal mol<sup>-1</sup>.

| R <sup>•</sup>                      | $\Delta E^\ddagger$ | $\Delta E_{\text{ZPVE}}^\ddagger$ | $\Delta E_0^\ddagger$ | $\Delta E_{\text{therm}}^\ddagger$ | $\Delta G_{\text{corr}}^\ddagger$ | $\Delta G^\ddagger$ |
|-------------------------------------|---------------------|-----------------------------------|-----------------------|------------------------------------|-----------------------------------|---------------------|
| •CH <sub>2</sub> NH <sub>2</sub>    | 13.79               | -1.30                             | 19.32                 | -5.53                              | 10.14                             | 25.23               |
| •CH <sub>2</sub> CH=CF <sub>2</sub> | 12.53               | -1.08                             | 15.67                 | -3.13                              | 11.02                             | 24.64               |
| •CH <sub>2</sub> CH=CH <sub>2</sub> | 13.09               | -0.94                             | 15.49                 | -2.41                              | 10.30                             | 24.32               |
| <sup>t</sup> Bu                     | 9.74                | -0.88                             | 16.10                 | -6.36                              | 12.80                             | 23.42               |
| •CH <sub>2</sub> N=CH <sub>2</sub>  | 10.44               | -0.31                             | 13.94                 | -3.50                              | 11.97                             | 22.72               |
| •CH <sub>2</sub> Ph                 | 10.49               | -1.04                             | 14.90                 | -4.41                              | 11.04                             | 22.57               |
| <sup>i</sup> Pr                     | 9.57                | -0.52                             | 16.98                 | -7.41                              | 12.19                             | 22.29               |
| •CH <sub>2</sub> SH                 | 9.30                | -0.32                             | 16.34                 | -7.04                              | 11.81                             | 21.43               |
| <sup>n</sup> Bu                     | 7.99                | -0.67                             | 16.92                 | -8.93                              | 11.73                             | 20.40               |
| <sup>n</sup> Pr                     | 8.28                | -0.52                             | 17.17                 | -8.89                              | 10.88                             | 19.68               |
| •CH(CH <sub>3</sub> )CN             | 6.55                | -0.54                             | 11.27                 | -4.72                              | 12.11                             | 19.20               |
| •(CH <sub>2</sub> ) <sub>4</sub> CN | 7.08                | -0.74                             | 16.05                 | -8.97                              | 11.36                             | 19.18               |
| •(CH <sub>2</sub> ) <sub>3</sub> CN | 6.54                | -0.64                             | 15.56                 | -9.02                              | 11.75                             | 18.93               |
| Et                                  | 8.28                | -0.56                             | 17.03                 | -8.75                              | 10.05                             | 18.89               |
| •(CH <sub>2</sub> ) <sub>2</sub> CN | 4.94                | -0.28                             | 14.07                 | -9.13                              | 13.52                             | 18.74               |
| •CH <sub>2</sub> F                  | 5.70                | -0.55                             | 14.72                 | -9.02                              | 10.22                             | 16.46               |
| •CH <sub>2</sub> OH                 | 5.39                | 0.30                              | 13.61                 | -8.22                              | 11.46                             | 16.54               |
| Me                                  | 6.35                | -0.17                             | 16.64                 | -10.29                             | 8.21                              | 14.73               |
| •CH <sub>2</sub> CN                 | 2.61                | -0.10                             | 9.00                  | -6.39                              | 11.13                             | 13.84               |
| •CH <sub>2</sub> CHO                | 1.22                | 0.00                              | 6.20                  | -4.98                              | 12.15                             | 13.37               |
| •CH <sub>2</sub> COOH               | 0.91                | -0.19                             | 7.10                  | -6.18                              | 11.86                             | 12.97               |
| •CHF <sub>2</sub>                   | 2.44                | -1.35                             | 10.90                 | -8.46                              | 8.96                              | 12.76               |
| •CH <sub>2</sub> CF <sub>3</sub>    | 0.60                | -0.27                             | 8.78                  | -8.17                              | 10.60                             | 11.48               |
| •CH <sub>2</sub> Cl                 | 5.80                | -0.05                             | 14.37                 | -8.56                              | 10.91                             | 16.76               |
| •CH <sub>2</sub> OCH <sub>3</sub>   | 9.69                | -1.00                             | 16.74                 | -7.05                              | 10.53                             | 21.23               |
| •CH <sub>2</sub> SCH <sub>3</sub>   | 10.10               | -0.62                             | 16.66                 | -6.57                              | 11.64                             | 22.36               |
| •CH <sub>2</sub> NHMe               | 14.40               | -1.50                             | 19.58                 | -5.18                              | 10.01                             | 25.91               |
| •CH <sub>2</sub> NHCOH              | 9.38                | -0.70                             | 15.53                 | -6.15                              | 10.92                             | 21.00               |
| •CH <sub>2</sub> COMe               | 1.84                | -0.16                             | 7.64                  | -5.79                              | 12.50                             | 14.50               |
| •CH <sub>2</sub> CONH <sub>2</sub>  | 3.02                | -0.03                             | 10.07                 | -7.05                              | 13.20                             | 16.25               |
| •CH <sub>2</sub> CF <sub>2</sub> H  | 2.53                | -0.44                             | 11.51                 | -8.98                              | 12.11                             | 15.09               |
| •CH <sub>2</sub> CFH <sub>2</sub>   | 4.05                | -0.53                             | 12.90                 | -8.85                              | 12.27                             | 16.85               |

**Table S7** Reaction energies ( $\Delta_r E$ , kcal mol<sup>-1</sup>), reaction Gibbs free energies ( $\Delta_r G$ , kcal mol<sup>-1</sup>), reaction enthalpies ( $\Delta_r H$ , kcal mol<sup>-1</sup>), rate constants ( $k_H$ , L mol<sup>-1</sup> s<sup>-1</sup>) and activation energies ( $E_a$ , kcal mol<sup>-1</sup>) of the H-atom abstraction reactions of NHC-BH<sub>3</sub> by R<sup>•</sup> computed at the B3LYP/6-311++G(d,p) in BTF at 376 K.

| R <sup>•</sup>                      | $\Delta_r E$ | $\Delta_r G$ | $\Delta_r H$ | $k_H$                 | $E_a$ |
|-------------------------------------|--------------|--------------|--------------|-----------------------|-------|
| •CH <sub>2</sub> NH <sub>2</sub>    | -11.98       | -12.99       | -11.98       | 9.716×10              | 14.47 |
| •CH <sub>2</sub> CH=CF <sub>2</sub> | -6.61        | -7.04        | -6.98        | 2.283×10 <sup>2</sup> | 13.30 |
| •CH <sub>2</sub> CH=CH <sub>2</sub> | -5.02        | -5.72        | -5.25        | 3.447×10 <sup>2</sup> | 13.83 |
| <sup>t</sup> Bu                     | -14.30       | -14.03       | -14.63       | 9.821×10 <sup>2</sup> | 10.39 |
| •CH <sub>2</sub> N=CH <sub>2</sub>  | -7.50        | -8.53        | -7.39        | 2.613×10 <sup>3</sup> | 11.04 |
| •CH <sub>2</sub> Ph                 | -9.59        | -11.88       | -9.14        | 3.232×10 <sup>3</sup> | 11.44 |
| <sup>i</sup> Pr                     | -16.93       | -16.79       | -17.32       | 4.319×10 <sup>3</sup> | 10.14 |
| •CH <sub>2</sub> SH                 | -16.04       | -16.26       | -16.36       | 1.292×10 <sup>4</sup> | 9.71  |
| <sup>n</sup> Bu                     | -21.17       | -21.03       | -21.48       | 5.006×10 <sup>4</sup> | 8.72  |
| <sup>n</sup> Pr                     | -20.97       | -21.33       | -21.19       | 1.300×10 <sup>5</sup> | 9.04  |
| •CH(CH <sub>3</sub> )CN             | -10.70       | -11.02       | -10.77       | 2.455×10 <sup>5</sup> | 7.38  |
| •(CH <sub>2</sub> ) <sub>4</sub> CN | -21.57       | -21.50       | -21.84       | 2.475×10 <sup>5</sup> | 7.90  |
| •(CH <sub>2</sub> ) <sub>3</sub> CN | -21.89       | -21.45       | -22.21       | 3.364×10 <sup>5</sup> | 7.35  |
| Et                                  | -20.61       | -20.82       | -20.92       | 3.831×10 <sup>5</sup> | 8.97  |
| •(CH <sub>2</sub> ) <sub>2</sub> CN | -22.92       | -23.01       | -23.21       | 3.840×10 <sup>5</sup> | 5.26  |
| •CH <sub>2</sub> F                  | -22.24       | -22.34       | -22.33       | 9.002×10 <sup>6</sup> | 6.41  |
| •CH <sub>2</sub> OH                 | -20.19       | -21.29       | -19.96       | 9.906×10 <sup>6</sup> | 6.13  |
| Me                                  | -25.44       | -24.66       | -25.54       | 8.676×10 <sup>7</sup> | 6.96  |
| •CH <sub>2</sub> CN                 | -16.62       | -17.70       | -16.48       | 2.597×10 <sup>8</sup> | 3.64  |
| •CH <sub>2</sub> CHO                | -13.78       | -14.49       | -13.97       | 4.411×10 <sup>8</sup> | 2.37  |
| •CH <sub>2</sub> COOH               | -18.21       | -18.67       | -18.58       | 7.545×10 <sup>8</sup> | 2.18  |
| •CHF <sub>2</sub>                   | -22.96       | -23.84       | -22.84       | 1.117×10 <sup>9</sup> | 3.73  |
| •CH <sub>2</sub> CF <sub>3</sub>    | -25.91       | -26.11       | -26.10       | 5.428×10 <sup>9</sup> | 1.94  |
| •CH <sub>2</sub> Cl                 | -20.95       | -20.55       | -21.31       | 5.513×10 <sup>6</sup> | 6.49  |
| •CH <sub>2</sub> OCH <sub>3</sub>   | -16.01       | -16.73       | -16.07       | 1.924×10 <sup>4</sup> | 10.34 |
| •CH <sub>2</sub> SCH <sub>3</sub>   | -14.77       | -15.20       | -14.99       | 4.087×10 <sup>3</sup> | 10.66 |
| •CH <sub>2</sub> NHMe               | -11.15       | -11.90       | -11.21       | 3.976×10              | 15.16 |
| •CH <sub>2</sub> NHCOH              | -13.83       | -14.92       | -13.82       | 2.564×10 <sup>4</sup> | 10.03 |
| •CH <sub>2</sub> COMe               | -15.55       | -15.49       | -15.93       | 1.005×10 <sup>8</sup> | 2.98  |
| •CH <sub>2</sub> CONH <sub>2</sub>  | -18.22       | -19.23       | -18.21       | 1.029×10 <sup>7</sup> | 3.86  |
| •CH <sub>2</sub> CF <sub>2</sub> H  | -24.45       | -24.36       | -24.71       | 4.698×10 <sup>7</sup> | 3.56  |
| •CH <sub>2</sub> CFH <sub>2</sub>   | -22.69       | -21.80       | -23.01       | 4.987×10 <sup>6</sup> | 4.88  |

**Table S8** Activation barrier ( $\Delta E^\ddagger$ ), activation zero-point vibrational energy correction ( $\Delta E_{\text{ZPVE}}^\ddagger$ ), intrinsic barrier ( $\Delta E_0^\ddagger$ ), thermal contribution ( $\Delta E_{\text{therm}}^\ddagger$ ), activation Gibbs free energy correction ( $\Delta G_{\text{corr}}^\ddagger$ ), and Gibbs free energy barrier ( $\Delta G^\ddagger$ ) of the H-atom abstraction reactions of NHC-BH<sub>2</sub>CN by R<sup>•</sup> computed at the B3LYP/6-311++G(d,p) in BTF at 376 K. All units are in kcal mol<sup>-1</sup>.

| R <sup>•</sup>                      | $\Delta E^\ddagger$ | $\Delta E_{\text{ZPVE}}^\ddagger$ | $\Delta E_0^\ddagger$ | $\Delta E_{\text{therm}}^\ddagger$ | $\Delta G_{\text{corr}}^\ddagger$ | $\Delta G^\ddagger$ |
|-------------------------------------|---------------------|-----------------------------------|-----------------------|------------------------------------|-----------------------------------|---------------------|
| •CH <sub>2</sub> NH <sub>2</sub>    | 12.46               | -1.30                             | 18.16                 | -5.70                              | 11.47                             | 25.22               |
| •CH <sub>2</sub> CH=CF <sub>2</sub> | 13.18               | -1.22                             | 16.54                 | -3.36                              | 11.94                             | 26.34               |
| •CH <sub>2</sub> CH=CH <sub>2</sub> | 13.96               | -0.96                             | 16.60                 | -2.64                              | 12.52                             | 27.44               |
| <sup>t</sup> Bu                     | 9.30                | -0.89                             | 15.83                 | -6.53                              | 14.18                             | 24.37               |
| •CH <sub>2</sub> N=CH <sub>2</sub>  | 12.03               | -0.50                             | 15.77                 | -3.74                              | 12.73                             | 25.26               |
| •CH <sub>2</sub> Ph                 | 11.23               | -1.17                             | 15.86                 | -4.64                              | 12.39                             | 24.78               |
| <sup>i</sup> Pr                     | 9.08                | -0.57                             | 16.65                 | -7.57                              | 13.31                             | 22.97               |
| •CH <sub>2</sub> SH                 | 9.44                | -0.46                             | 16.68                 | -7.24                              | 12.30                             | 22.20               |
| <sup>n</sup> Bu                     | 7.83                | -0.71                             | 16.93                 | -9.10                              | 12.87                             | 21.41               |
| <sup>n</sup> Pr                     | 8.22                | -0.51                             | 17.29                 | -9.07                              | 12.51                             | 21.25               |
| •CH(CH <sub>3</sub> )CN             | 8.57                | -0.68                             | 13.59                 | -5.02                              | 13.73                             | 22.98               |
| •(CH <sub>2</sub> ) <sub>4</sub> CN | 7.32                | -0.67                             | 16.51                 | -9.19                              | 13.74                             | 21.73               |
| •(CH <sub>2</sub> ) <sub>3</sub> CN | 6.96                | -0.56                             | 16.22                 | -9.26                              | 13.78                             | 21.29               |
| Et                                  | 8.28                | -0.42                             | 17.21                 | -8.93                              | 12.33                             | 21.03               |
| •(CH <sub>2</sub> ) <sub>2</sub> CN | 6.00                | -0.26                             | 15.49                 | -9.49                              | 13.23                             | 19.49               |
| •CH <sub>2</sub> F                  | 6.19                | -0.60                             | 15.47                 | -9.28                              | 10.80                             | 17.60               |
| •CH <sub>2</sub> OH                 | 5.07                | 0.39                              | 13.42                 | -8.35                              | 13.05                             | 17.73               |
| Me                                  | 6.73                | -0.16                             | 17.26                 | -10.53                             | 10.49                             | 17.38               |
| •CH <sub>2</sub> CN                 | 5.02                | -0.29                             | 12.06                 | -7.04                              | 12.85                             | 18.17               |
| •CH <sub>2</sub> CHO                | 3.73                | -0.55                             | 9.53                  | -5.80                              | 13.45                             | 17.73               |
| •CH <sub>2</sub> COOH               | 3.43                | -0.53                             | 10.75                 | -7.32                              | 13.14                             | 17.10               |
| •CHF <sub>2</sub>                   | 3.62                | -1.38                             | 12.62                 | -9.00                              | 11.46                             | 16.46               |
| •CH <sub>2</sub> CF <sub>3</sub>    | 2.41                | -0.42                             | 11.97                 | -9.56                              | 13.83                             | 16.67               |
| •CH <sub>2</sub> Cl                 | 6.67                | -0.16                             | 15.54                 | -8.87                              | 12.66                             | 19.49               |
| •CH <sub>2</sub> OCH <sub>3</sub>   | 9.22                | -1.03                             | 16.43                 | -7.22                              | 11.63                             | 21.88               |
| •CH <sub>2</sub> SCH <sub>3</sub>   | 10.04               | -0.68                             | 16.81                 | -6.77                              | 13.32                             | 24.04               |
| •CH <sub>2</sub> NHMe               | 13.01               | -1.55                             | 18.38                 | -5.36                              | 11.29                             | 25.85               |
| •CH <sub>2</sub> NHCOH              | 9.87                | -0.67                             | 16.24                 | -6.37                              | 13.14                             | 23.68               |
| •CH <sub>2</sub> COMe               | 4.21                | -0.55                             | 10.73                 | -6.52                              | 13.96                             | 18.72               |
| •CH <sub>2</sub> CONH <sub>2</sub>  | 4.53                | -0.65                             | 12.07                 | -7.54                              | 12.67                             | 17.85               |
| •CH <sub>2</sub> CF <sub>2</sub> H  | 3.89                | -0.55                             | 13.48                 | -9.59                              | 14.02                             | 18.46               |
| •CH <sub>2</sub> CFH <sub>2</sub>   | 5.29                | -0.61                             | 14.58                 | -9.29                              | 13.67                             | 19.57               |



**Table S9** Reaction energies ( $\Delta_r E$ , kcal mol<sup>-1</sup>), reaction Gibbs free energies ( $\Delta_r G$ , kcal mol<sup>-1</sup>), reaction enthalpies ( $\Delta_r H$ , kcal mol<sup>-1</sup>), rate constants ( $k_H$ , L mol<sup>-1</sup> s<sup>-1</sup>) and activation energies ( $E_a$ , kcal mol<sup>-1</sup>) of the H-atom abstraction reactions of NHC-BH<sub>2</sub>CN by R<sup>•</sup> computed at the B3LYP/6-311++G(d,p) in BTF at 376 K.

| R <sup>•</sup>                      | $\Delta_r E$ | $\Delta_r G$ | $\Delta_r H$ | $k_H$                 | $E_a$ |
|-------------------------------------|--------------|--------------|--------------|-----------------------|-------|
| •CH <sub>2</sub> NH <sub>2</sub>    | -12.48       | -11.60       | -12.81       | 9.478×10              | 13.02 |
| •CH <sub>2</sub> CH=CF <sub>2</sub> | -7.11        | -5.66        | -7.82        | 2.502×10              | 13.87 |
| •CH <sub>2</sub> CH=CH <sub>2</sub> | -5.51        | -4.33        | -6.08        | 5.752                 | 14.50 |
| <sup>t</sup> Bu                     | -14.79       | -12.64       | -15.47       | 2.707×10 <sup>2</sup> | 9.90  |
| •CH <sub>2</sub> N=CH <sub>2</sub>  | -7.99        | -7.15        | -8.23        | 9.858×10              | 12.50 |
| •CH <sub>2</sub> Ph                 | -10.08       | -10.49       | -9.98        | 1.793×10 <sup>2</sup> | 12.05 |
| <sup>i</sup> Pr                     | -17.42       | -15.40       | -18.16       | 1.719×10 <sup>3</sup> | 9.55  |
| •CH <sub>2</sub> SH                 | -16.54       | -14.88       | -17.20       | 4.892×10 <sup>3</sup> | 9.70  |
| <sup>n</sup> Bu                     | -21.66       | -19.64       | -22.32       | 1.291×10 <sup>4</sup> | 8.43  |
| <sup>n</sup> Pr                     | -21.46       | -19.94       | -22.02       | 1.592×10 <sup>4</sup> | 8.85  |
| •CH(CH <sub>3</sub> )CN             | -11.20       | -9.63        | -11.61       | 1.789×10 <sup>3</sup> | 9.12  |
| •(CH <sub>2</sub> ) <sub>4</sub> CN | -22.06       | -20.11       | -22.68       | 8.322×10 <sup>3</sup> | 7.93  |
| •(CH <sub>2</sub> ) <sub>3</sub> CN | -22.39       | -20.06       | -23.05       | 1.460×10 <sup>4</sup> | 7.53  |
| Et                                  | -21.10       | -19.43       | -21.75       | 2.181×10 <sup>4</sup> | 8.70  |
| •(CH <sub>2</sub> ) <sub>2</sub> CN | -23.41       | -21.62       | -24.05       | 1.499×10 <sup>5</sup> | 6.70  |
| •CH <sub>2</sub> F                  | -22.73       | -20.95       | -23.17       | 2.050×10 <sup>6</sup> | 6.72  |
| •CH <sub>2</sub> OH                 | -20.68       | -19.91       | -20.80       | 2.006×10 <sup>6</sup> | 5.65  |
| Me                                  | -25.93       | -23.27       | -26.38       | 2.541×10 <sup>6</sup> | 7.13  |
| •CH <sub>2</sub> CN                 | -17.11       | -16.31       | -17.32       | 9.200×10 <sup>5</sup> | 5.68  |
| •CH <sub>2</sub> CHO                | -14.28       | -13.10       | -14.81       | 1.496×10 <sup>6</sup> | 4.54  |
| •CH <sub>2</sub> COOH               | -18.70       | -17.28       | -19.42       | 3.262×10 <sup>6</sup> | 4.41  |
| •CHF <sub>2</sub>                   | -23.45       | -22.45       | -23.68       | 8.511×10 <sup>6</sup> | 4.61  |
| •CH <sub>2</sub> CF <sub>3</sub>    | -26.40       | -24.73       | -26.94       | 5.506×10 <sup>6</sup> | 3.36  |
| •CH <sub>2</sub> Cl                 | -21.44       | -19.17       | -22.15       | 1.548×10 <sup>5</sup> | 7.04  |
| •CH <sub>2</sub> OCH <sub>3</sub>   | -16.50       | -15.34       | -16.91       | 7.991×10 <sup>3</sup> | 9.77  |
| •CH <sub>2</sub> SCH <sub>3</sub>   | -15.26       | -13.81       | -15.82       | 4.455×10 <sup>2</sup> | 10.43 |
| •CH <sub>2</sub> NHMe               | -11.65       | -10.52       | -12.05       | 4.168×10              | 13.77 |
| •CH <sub>2</sub> NHCOH              | -14.32       | -13.54       | -14.65       | 7.399×10 <sup>2</sup> | 10.31 |
| •CH <sub>2</sub> COMe               | -16.04       | -14.10       | -16.76       | 4.189×10 <sup>5</sup> | 5.05  |
| •CH <sub>2</sub> CONH <sub>2</sub>  | -18.72       | -17.84       | -19.04       | 1.314×10 <sup>6</sup> | 5.42  |
| •CH <sub>2</sub> CF <sub>2</sub> H  | -24.94       | -22.97       | -25.54       | 5.462×10 <sup>5</sup> | 4.67  |
| •CH <sub>2</sub> CFH <sub>2</sub>   | -23.18       | -20.41       | -23.84       | 1.386×10 <sup>5</sup> | 5.93  |

**Table S10** List of Cartesian coordinates of located stationary points at the B3LYP/6-311++G(d,p) in BTF at 376 K.

|                                   |            |             |             |             |
|-----------------------------------|------------|-------------|-------------|-------------|
| NHC-BH <sub>3</sub>               | C          | -0.01195714 | 0.59840928  | 0.00036495  |
|                                   | C          | 0.73707899  | -1.53072526 | 0.00011759  |
|                                   | C          | -0.61881869 | -1.57624954 | 0.00042152  |
|                                   | H          | 1.47209526  | -2.32046818 | -0.00000226 |
|                                   | H          | -1.29830022 | -2.41421970 | 0.00051089  |
|                                   | N          | -1.05797167 | -0.26736399 | 0.00054185  |
|                                   | N          | 1.09067807  | -0.19342460 | 0.00003154  |
|                                   | C          | -2.45575981 | 0.13090918  | -0.00001993 |
|                                   | H          | -2.84203125 | 0.14052088  | 1.02242385  |
|                                   | H          | -2.52405257 | 1.13131172  | -0.42381889 |
|                                   | H          | -3.04262714 | -0.56361400 | -0.60659156 |
|                                   | C          | 2.46988939  | 0.26781691  | -0.00018273 |
|                                   | H          | 2.98413017  | -0.09760485 | -0.89279452 |
|                                   | H          | 2.46515966  | 1.35601416  | -0.00036653 |
|                                   | H          | 2.98430299  | -0.09728658 | 0.89246058  |
|                                   | H          | -0.75242955 | 2.53027330  | 0.99719241  |
|                                   | H          | 0.97620839  | 2.71293274  | 0.00121087  |
|                                   | H          | -0.75026207 | 2.52988543  | -0.99859987 |
|                                   | B          | -0.12474699 | 2.19536235  | 0.00003058  |
| NHC-BH <sub>2</sub> CN            | C          | -2.18891000 | 0.10316100  | -0.44796100 |
|                                   | H          | -3.16413200 | -0.22345100 | -0.76400600 |
|                                   | C          | -1.64983200 | 1.34538000  | -0.37200500 |
|                                   | H          | -2.06288100 | 2.30928500  | -0.61321700 |
|                                   | N          | -0.36361400 | 1.19231200  | 0.11182200  |
|                                   | C          | 0.58360200  | 2.29060000  | 0.30667900  |
|                                   | H          | 1.24384900  | 2.04762000  | 1.13593900  |
|                                   | H          | 1.17605500  | 2.44451000  | -0.59611200 |
|                                   | H          | 0.02694600  | 3.19718400  | 0.53710900  |
|                                   | N          | -1.21834800 | -0.78307000 | -0.01512000 |
|                                   | C          | -1.40775200 | -2.23458200 | 0.06338800  |
|                                   | H          | -2.37653300 | -2.47287500 | -0.37059800 |
|                                   | H          | -0.62577800 | -2.74422300 | -0.49598200 |
|                                   | H          | -1.38470600 | -2.56290900 | 1.10156300  |
|                                   | C          | -0.09321800 | -0.11569000 | 0.33054800  |
|                                   | H          | 1.60289300  | -0.11062300 | 1.89804900  |
|                                   | H          | 1.11531700  | -1.89769200 | 1.19181000  |
|                                   | B          | 1.27503600  | -0.73559300 | 0.91207100  |
|                                   | C          | 2.43621600  | -0.61991100 | -0.16311600 |
| N                                 | 3.29527000 | -0.54104200 | -0.93814700 |             |
| NHC- <sup>•</sup> BH <sub>2</sub> | C          | 0.67933135  | -1.50803756 | -0.00001675 |
|                                   | H          | 1.37528748  | -2.32932407 | -0.00008529 |

|                                    |   |             |             |             |
|------------------------------------|---|-------------|-------------|-------------|
|                                    | C | -0.67934825 | -1.50804538 | 0.00016982  |
|                                    | H | -1.37531925 | -2.32931900 | 0.00024863  |
|                                    | N | -1.09459266 | -0.19302203 | -0.00007515 |
|                                    | C | -2.47794991 | 0.25000429  | -0.00003513 |
|                                    | H | -2.68613661 | 0.85154082  | 0.88732044  |
|                                    | H | -2.68600282 | 0.85210227  | -0.88703497 |
|                                    | H | -3.12638188 | -0.62469493 | -0.00036498 |
|                                    | N | 1.09458972  | -0.19302400 | -0.00017431 |
|                                    | C | 2.47795222  | 0.24998040  | 0.00004520  |
|                                    | H | 3.12636629  | -0.62473117 | -0.00101163 |
|                                    | H | 2.68589571  | 0.85270947  | -0.88654576 |
|                                    | H | 2.68628550  | 0.85088166  | 0.88780404  |
|                                    | C | -0.00001074 | 0.66097157  | -0.00002694 |
|                                    | B | 0.00001983  | 2.16353766  | 0.00006256  |
|                                    | H | 1.03675603  | 2.75808017  | 0.00012678  |
|                                    | H | -1.03667703 | 2.75814872  | 0.00015898  |
| NHC-<br>B(•)HCN                    | C | -2.24247489 | 0.54701648  | -0.00003643 |
|                                    | H | -3.31780369 | 0.50501618  | -0.00006248 |
|                                    | C | -1.40195708 | 1.61455324  | -0.00001640 |
|                                    | H | -1.61311999 | 2.66980752  | -0.00003119 |
|                                    | N | -0.11324127 | 1.12509943  | 0.00001660  |
|                                    | C | 1.08359139  | 1.95959081  | 0.00003099  |
|                                    | H | 1.68378147  | 1.76257506  | 0.88837966  |
|                                    | H | 1.68375510  | 1.76265221  | -0.88835317 |
|                                    | H | 0.77420617  | 3.00281185  | 0.00008206  |
|                                    | N | -1.46285303 | -0.58868237 | -0.00001699 |
|                                    | C | -1.98160341 | -1.95187208 | 0.00000390  |
|                                    | H | -3.06877883 | -1.90583526 | -0.00006615 |
|                                    | H | -1.64301017 | -2.48621627 | -0.88838518 |
|                                    | H | -1.64311914 | -2.48614928 | 0.88847549  |
|                                    | C | -0.12706772 | -0.25168886 | 0.00002274  |
|                                    | H | 0.76938919  | -2.41009137 | 0.00006640  |
|                                    | B | 1.01747705  | -1.24646575 | 0.00005393  |
|                                    | C | 2.48773786  | -0.85242498 | 0.00002088  |
|                                    | N | 3.63008826  | -0.61831558 | -0.00007520 |
| CH <sub>3</sub> NH <sub>2</sub>    | C | -0.71057100 | -0.00000100 | 0.01716100  |
|                                    | H | -1.12162800 | 0.88097900  | -0.48157700 |
|                                    | H | -1.06828800 | -0.00007300 | 1.05616300  |
|                                    | H | -1.12164600 | -0.88089900 | -0.48170800 |
|                                    | N | 0.75339700  | -0.00000100 | -0.12456100 |
|                                    | H | 1.15060400  | 0.81209800  | 0.33804100  |
|                                    | H | 1.15060800  | -0.81209800 | 0.33804100  |
| CH <sub>3</sub> CH=CF <sub>2</sub> | C | -2.00947700 | 0.02868600  | 0.00000700  |
|                                    | H | -2.82210900 | -0.69764300 | -0.00005200 |

|                                    |   |             |             |             |
|------------------------------------|---|-------------|-------------|-------------|
|                                    | H | -2.12947100 | 0.66423700  | -0.88173700 |
|                                    | H | -2.12952300 | 0.66415000  | 0.88180700  |
|                                    | C | -0.68108100 | -0.68195900 | 0.00001200  |
|                                    | H | -0.64341100 | -1.76371700 | 0.00002800  |
|                                    | C | 0.48311400  | -0.06369800 | -0.00000100 |
|                                    | F | 1.67857300  | -0.65667200 | 0.00000500  |
|                                    | F | 0.65133600  | 1.26054000  | -0.00002200 |
| CH <sub>3</sub> CH=CH <sub>2</sub> | C | 1.24070900  | -0.15748500 | 0.00000000  |
|                                    | H | 2.01938300  | 0.60749200  | -0.00002800 |
|                                    | H | 1.39556600  | -0.78804600 | -0.88103300 |
|                                    | H | 1.39558600  | -0.78800000 | 0.88106300  |
|                                    | C | -0.13860100 | 0.45854000  | 0.00000000  |
|                                    | H | -0.18492100 | 1.54571100  | 0.00000000  |
|                                    | C | -1.28251800 | -0.22498000 | 0.00000000  |
|                                    | H | -1.29987200 | -1.31189900 | -0.00000100 |
|                                    | H | -2.24328100 | 0.27829500  | 0.00000100  |
| CH(CH <sub>3</sub> ) <sub>3</sub>  | C | -1.45656600 | -0.11922700 | 0.09590200  |
|                                    | H | -2.06067400 | 0.71811300  | -0.26656700 |
|                                    | H | -1.91546400 | -1.04502100 | -0.26437600 |
|                                    | H | -1.51344800 | -0.12249600 | 1.19039300  |
|                                    | C | 0.83153100  | -1.20178400 | 0.09589800  |
|                                    | H | 1.86232300  | -1.13693000 | -0.26562300 |
|                                    | H | 0.86428200  | -1.24882000 | 1.19040300  |
|                                    | H | 0.40749800  | -2.14362800 | -0.26547800 |
|                                    | C | 0.62502400  | 1.32103500  | 0.09587900  |
|                                    | H | 0.64894700  | 1.37285300  | 1.19036100  |
|                                    | H | 1.65287200  | 1.42454400  | -0.26508400 |
|                                    | H | 0.05375700  | 2.18141100  | -0.26590300 |
|                                    | C | -0.00000800 | -0.00002300 | -0.37232400 |
|                                    | H | 0.00002400  | -0.00002900 | -1.47026000 |
| CH <sub>3</sub> N=CH <sub>2</sub>  | C | -1.18290100 | 0.18280400  | -0.00000100 |
|                                    | H | -2.16331800 | -0.29172700 | 0.00009100  |
|                                    | H | -1.15626900 | 1.28066600  | -0.00002000 |
|                                    | N | -0.14182200 | -0.53643000 | -0.00002900 |
|                                    | C | 1.15041000  | 0.13477700  | 0.00000700  |
|                                    | H | 1.71772900  | -0.18567400 | -0.87825200 |
|                                    | H | 1.07250400  | 1.23070000  | -0.00079400 |
|                                    | H | 1.71705100  | -0.18444300 | 0.87914500  |
| CH <sub>3</sub> Ph                 | C | 1.20023500  | -1.20429900 | 0.00207700  |
|                                    | C | -0.19455000 | -1.20145700 | -0.00900600 |
|                                    | C | -0.91413300 | 0.00000100  | -0.01132300 |
|                                    | C | -0.19454900 | 1.20145700  | -0.00900600 |
|                                    | C | 1.20023600  | 1.20429900  | 0.00207700  |
|                                    | C | 1.90405500  | 0.00000000  | 0.00849300  |

|                                                                     |   |             |             |             |
|---------------------------------------------------------------------|---|-------------|-------------|-------------|
|                                                                     | H | 1.73672400  | -2.14698000 | 0.00174500  |
|                                                                     | H | -0.73234000 | -2.14435700 | -0.01812000 |
|                                                                     | H | -0.73233900 | 2.14435800  | -0.01812000 |
|                                                                     | H | 1.73672600  | 2.14697900  | 0.00174500  |
|                                                                     | H | 2.98825100  | -0.00000100 | 0.01413800  |
|                                                                     | C | -2.42414600 | 0.00000000  | 0.00899800  |
|                                                                     | H | -2.82932500 | -0.88525100 | -0.48644700 |
|                                                                     | H | -2.80125800 | -0.00003200 | 1.03758100  |
|                                                                     | H | -2.82932500 | 0.88528200  | -0.48639300 |
| CH <sub>2</sub> (CH <sub>3</sub> ) <sub>2</sub>                     | C | -1.27709900 | -0.25992100 | 0.00000000  |
|                                                                     | H | -1.32103700 | -0.90522400 | 0.88338500  |
|                                                                     | H | -2.17346300 | 0.36682800  | -0.00000400 |
|                                                                     | H | -1.32103700 | -0.90523200 | -0.88338000 |
|                                                                     | C | 1.27709900  | -0.25992100 | 0.00000000  |
|                                                                     | H | 2.17346300  | 0.36682800  | -0.00000400 |
|                                                                     | H | 1.32103700  | -0.90522400 | 0.88338500  |
|                                                                     | H | 1.32103700  | -0.90523200 | -0.88337900 |
|                                                                     | C | 0.00000000  | 0.58620200  | 0.00000000  |
|                                                                     | H | 0.00000000  | 1.24454400  | -0.87611300 |
|                                                                     | H | 0.00000000  | 1.24454900  | 0.87611000  |
| CH <sub>3</sub> SH                                                  | C | -1.16695200 | 0.01961400  | 0.00000100  |
|                                                                     | H | -1.53228100 | -1.00668100 | -0.00005800 |
|                                                                     | H | -1.52643300 | 0.52617200  | -0.89409800 |
|                                                                     | H | -1.52644500 | 0.52608100  | 0.89414600  |
|                                                                     | S | 0.66684400  | -0.08751300 | 0.00000000  |
|                                                                     | H | 0.91736600  | 1.23694900  | -0.00000100 |
| CH <sub>3</sub> (CH <sub>2</sub> ) <sub>2</sub> C<br>H <sub>3</sub> | C | 1.96230300  | -0.12104800 | -0.00000300 |
|                                                                     | H | 2.10908000  | -0.75092900 | -0.88356900 |
|                                                                     | H | 2.10912800  | -0.75082100 | 0.88363200  |
|                                                                     | H | 2.74833900  | 0.63982300  | -0.00007300 |
|                                                                     | C | 0.56849100  | 0.51391100  | 0.00000300  |
|                                                                     | H | 0.46396900  | 1.16515300  | 0.87688700  |
|                                                                     | H | 0.46396400  | 1.16514400  | -0.87688500 |
|                                                                     | C | -0.56849100 | -0.51391100 | 0.00000400  |
|                                                                     | H | -0.46396800 | -1.16514400 | 0.87689300  |
|                                                                     | H | -0.46396500 | -1.16515200 | -0.87687900 |
|                                                                     | C | -1.96230300 | 0.12104800  | -0.00000300 |
|                                                                     | H | -2.10909700 | 0.75088600  | -0.88359700 |
|                                                                     | H | -2.74833900 | -0.63982300 | -0.00002000 |
|                                                                     | H | -2.10911200 | 0.75086400  | 0.88360400  |
| CH <sub>3</sub> CH <sub>2</sub> CH <sub>3</sub>                     | C | -1.27709900 | -0.25992100 | 0.00000000  |
|                                                                     | H | -1.32103700 | -0.90522400 | 0.88338500  |
|                                                                     | H | -2.17346300 | 0.36682800  | -0.00000400 |
|                                                                     | H | -1.32103700 | -0.90523200 | -0.88338000 |

|                                                        |   |             |             |             |
|--------------------------------------------------------|---|-------------|-------------|-------------|
|                                                        | C | 1.27709900  | -0.25992100 | 0.00000000  |
|                                                        | H | 2.17346300  | 0.36682800  | -0.00000400 |
|                                                        | H | 1.32103700  | -0.90522400 | 0.88338500  |
|                                                        | H | 1.32103700  | -0.90523200 | -0.88337900 |
|                                                        | C | 0.00000000  | 0.58620200  | 0.00000000  |
|                                                        | H | 0.00000000  | 1.24454400  | -0.87611300 |
|                                                        | H | 0.00000000  | 1.24454900  | 0.87611000  |
| CH <sub>2</sub> (CH <sub>3</sub> )CN                   | C | 0.00000000  | 0.80707100  | 0.00000000  |
|                                                        | H | 0.29921600  | 1.38570300  | 0.87851800  |
|                                                        | H | 0.29921600  | 1.38570300  | -0.87851800 |
|                                                        | C | 0.77075500  | -0.43407200 | 0.00000000  |
|                                                        | N | 1.36961100  | -1.42065400 | 0.00000000  |
|                                                        | C | -1.51974500 | 0.56543900  | 0.00000000  |
|                                                        | H | -2.03617500 | 1.52659000  | 0.00000000  |
|                                                        | H | -1.82779500 | 0.00798000  | -0.88604300 |
|                                                        | H | -1.82779500 | 0.00798000  | 0.88604300  |
| CH <sub>3</sub> (CH <sub>2</sub> ) <sub>3</sub> C<br>N | C | 1.65044300  | 0.48407200  | 0.00000000  |
|                                                        | H | 1.69682600  | 1.13921300  | -0.87766700 |
|                                                        | H | 1.69682600  | 1.13921300  | 0.87766700  |
|                                                        | C | 0.31500700  | -0.26621600 | 0.00000000  |
|                                                        | H | 0.25290000  | -0.91514800 | -0.87916200 |
|                                                        | H | 0.25290000  | -0.91514800 | 0.87916200  |
|                                                        | C | -0.88660100 | 0.70132200  | 0.00000000  |
|                                                        | H | -0.85471600 | 1.35226500  | -0.87928500 |
|                                                        | H | -0.85471600 | 1.35226500  | 0.87928500  |
|                                                        | C | -2.17212700 | 0.00984100  | 0.00000000  |
|                                                        | N | -3.18081400 | -0.55133900 | 0.00000000  |
|                                                        | C | 2.85597200  | -0.45970800 | 0.00000000  |
|                                                        | H | 2.85256800  | -1.10501200 | -0.88378100 |
|                                                        | H | 3.79437300  | 0.10087200  | 0.00000000  |
|                                                        | H | 2.85256800  | -1.10501200 | 0.88378100  |
| CH <sub>3</sub> (CH <sub>2</sub> ) <sub>2</sub> C<br>N | C | -0.88031000 | -0.52757400 | 0.00000000  |
|                                                        | H | -0.71884600 | -1.15822500 | 0.87853300  |
|                                                        | H | -0.71884600 | -1.15822500 | -0.87853300 |
|                                                        | C | 0.16253700  | 0.61015400  | 0.00000000  |
|                                                        | H | 0.03232900  | 1.24858800  | 0.87942400  |
|                                                        | H | 0.03233000  | 1.24858800  | -0.87942400 |
|                                                        | C | 1.53753700  | 0.11988600  | 0.00000000  |
|                                                        | N | 2.61884000  | -0.28392600 | 0.00000000  |
|                                                        | C | -2.30829700 | 0.01991500  | 0.00000000  |
|                                                        | H | -3.03290900 | -0.79761700 | 0.00000000  |
|                                                        | H | -2.49737000 | 0.63504300  | 0.88467200  |
|                                                        | H | -2.49737000 | 0.63504300  | -0.88467200 |
| CH <sub>3</sub> CH <sub>3</sub>                        | C | 0.76569900  | -0.00003000 | 0.00000000  |

|                                    |   |             |             |             |
|------------------------------------|---|-------------|-------------|-------------|
|                                    | H | 1.16238000  | 0.50966700  | -0.88261800 |
|                                    | H | 1.16238000  | 0.50966500  | 0.88261900  |
|                                    | H | 1.16240700  | -1.01920200 | -0.00000100 |
|                                    | C | -0.76570300 | 0.00000500  | 0.00000000  |
|                                    | H | -1.16239900 | -0.50960300 | 0.88264400  |
|                                    | H | -1.16234700 | 1.01922000  | 0.00000100  |
|                                    | H | -1.16239900 | -0.50960200 | -0.88264500 |
| CH <sub>3</sub> CH <sub>2</sub> CN | C | 0.00000000  | 0.80707100  | 0.00000000  |
|                                    | H | 0.29921600  | 1.38570300  | 0.87851800  |
|                                    | H | 0.29921600  | 1.38570300  | -0.87851800 |
|                                    | C | 0.77075500  | -0.43407200 | 0.00000000  |
|                                    | N | 1.36961100  | -1.42065400 | 0.00000000  |
|                                    | C | -1.51974500 | 0.56543900  | 0.00000000  |
|                                    | H | -2.03617500 | 1.52659000  | 0.00000000  |
|                                    | H | -1.82779500 | 0.00798000  | -0.88604300 |
|                                    | H | -1.82779500 | 0.00798000  | 0.88604300  |
| CH <sub>3</sub> F                  | C | 0.00000000  | 0.00000000  | -0.64747100 |
|                                    | H | 0.00000000  | 1.03539900  | -0.98842700 |
|                                    | H | -0.89668200 | -0.51769900 | -0.98842700 |
|                                    | H | 0.89668200  | -0.51769900 | -0.98842700 |
|                                    | F | 0.00000000  | 0.00000000  | 0.76112300  |
| CH <sub>3</sub> OH                 | C | 0.67140000  | -0.01982600 | 0.00000200  |
|                                    | H | 1.08981700  | 0.98679100  | -0.00119400 |
|                                    | H | 1.02440500  | -0.54858900 | -0.89178300 |
|                                    | H | 1.02459200  | -0.54656400 | 0.89292000  |
|                                    | O | -0.75260800 | 0.12286600  | 0.00000400  |
|                                    | H | -1.14635000 | -0.75560400 | 0.00001300  |
| CH <sub>4</sub>                    | C | 0.00000000  | 0.00000000  | 0.00000000  |
|                                    | H | 0.62993900  | 0.62993900  | 0.62993900  |
|                                    | H | -0.62993900 | -0.62993900 | 0.62993900  |
|                                    | H | -0.62993900 | 0.62993900  | -0.62993900 |
|                                    | H | 0.62993900  | -0.62993900 | -0.62993900 |
| CH <sub>3</sub> CN                 | C | 0.00014200  | -1.17539600 | 0.00000000  |
|                                    | H | 0.51303100  | -1.54879700 | 0.88806100  |
|                                    | H | 0.51303100  | -1.54879700 | -0.88806100 |
|                                    | C | 0.00000000  | 0.27879300  | 0.00000000  |
|                                    | N | -0.00023800 | 1.43232000  | 0.00000000  |
|                                    | H | -1.02525200 | -1.54902600 | 0.00000000  |
| CH <sub>3</sub> CHO                | C | -1.16891100 | -0.13639100 | 0.00000300  |
|                                    | H | -1.31116400 | -0.76926000 | 0.88103200  |
|                                    | H | -1.91354900 | 0.65978300  | 0.00001800  |
|                                    | H | -1.31119700 | -0.76926000 | -0.88102200 |
|                                    | C | 0.23337500  | 0.41041900  | -0.00002300 |
|                                    | H | 0.33646200  | 1.51344000  | 0.00004600  |

|                                  |    |             |             |             |
|----------------------------------|----|-------------|-------------|-------------|
|                                  | O  | 1.22658300  | -0.28485900 | 0.00000600  |
| CH <sub>3</sub> COOH             | C  | 1.38959900  | -0.17233000 | 0.00000900  |
|                                  | H  | 1.59792900  | -1.24006500 | 0.00002600  |
|                                  | H  | 1.83776600  | 0.29197800  | 0.88079200  |
|                                  | H  | 1.83783400  | 0.29196400  | -0.88074600 |
|                                  | C  | -0.08581100 | 0.11622300  | -0.00005400 |
|                                  | O  | -0.83771600 | -1.00584200 | 0.00000700  |
|                                  | H  | -1.77220000 | -0.74270900 | 0.00003500  |
|                                  | O  | -0.57779200 | 1.22277600  | 0.00001400  |
| CH <sub>2</sub> F <sub>2</sub>   | C  | 0.00000000  | 0.51617100  | 0.00000000  |
|                                  | H  | -0.00008400 | 1.10623400  | 0.91518000  |
|                                  | H  | -0.00008400 | 1.10623400  | -0.91518000 |
|                                  | F  | -1.10814400 | -0.29492800 | 0.00000000  |
|                                  | F  | 1.10816200  | -0.29501600 | 0.00000000  |
| CH <sub>3</sub> CF <sub>3</sub>  | C  | 1.48437100  | -0.00056000 | -0.00059300 |
|                                  | H  | 1.84466100  | 0.11871100  | -1.02202200 |
|                                  | H  | 1.84468500  | -0.94485200 | 0.40674000  |
|                                  | H  | 1.84499400  | 0.82425700  | 0.61346100  |
|                                  | C  | -0.01414000 | -0.00002500 | -0.00021900 |
|                                  | F  | -0.53264000 | -1.00789500 | -0.74819300 |
|                                  | F  | -0.53106700 | -0.14418200 | 1.24715400  |
|                                  | F  | -0.53137400 | 1.15267700  | -0.49821800 |
| CH <sub>3</sub> Cl               | C  | 0.00000000  | 0.00000000  | -1.14883400 |
|                                  | H  | 0.00000000  | 1.03433700  | -1.48178400 |
|                                  | H  | -0.89576200 | -0.51716800 | -1.48178400 |
|                                  | H  | 0.89576200  | -0.51716800 | -1.48178400 |
|                                  | Cl | 0.00000000  | 0.00000000  | 0.66696200  |
| CH <sub>3</sub> OCH <sub>3</sub> | O  | 0.00000200  | 0.59143100  | 0.00000400  |
|                                  | C  | -1.17949800 | -0.19698100 | 0.00000100  |
|                                  | H  | -1.23180100 | -0.83465900 | 0.89262500  |
|                                  | H  | -2.02859100 | 0.48675200  | -0.00090300 |
|                                  | H  | -1.23095600 | -0.83592700 | -0.89176100 |
|                                  | C  | 1.17949500  | -0.19698400 | -0.00000200 |
|                                  | H  | 1.23168500  | -0.83481800 | -0.89251600 |
|                                  | H  | 2.02857800  | 0.48676200  | 0.00065900  |
|                                  | H  | 1.23108300  | -0.83576900 | 0.89187300  |
| CH <sub>3</sub> SCH <sub>3</sub> | C  | -1.39902600 | -0.51353100 | 0.00000000  |
|                                  | H  | -2.31384200 | 0.07971800  | 0.00000000  |
|                                  | H  | -1.37977100 | -1.13929500 | 0.89368300  |
|                                  | H  | -1.37977100 | -1.13929500 | -0.89368300 |
|                                  | S  | 0.00000000  | 0.66000700  | 0.00000000  |
|                                  | C  | 1.39902600  | -0.51353100 | 0.00000000  |
|                                  | H  | 1.37977100  | -1.13929500 | -0.89368300 |
|                                  | H  | 2.31384200  | 0.07971800  | 0.00000000  |



|                                   |   |             |             |             |
|-----------------------------------|---|-------------|-------------|-------------|
|                                   | H | 1.37977100  | -1.13929500 | 0.89368300  |
| CH <sub>3</sub> NHMe              | C | 1.21769000  | -0.22380700 | 0.02016200  |
|                                   | H | 1.28393700  | -0.97021200 | -0.77713900 |
|                                   | H | 2.09292900  | 0.42525300  | -0.05488500 |
|                                   | H | 1.26342400  | -0.75877500 | 0.98373400  |
|                                   | N | 0.00000000  | 0.56627300  | -0.15178400 |
|                                   | H | 0.00000000  | 1.32923500  | 0.51712100  |
|                                   | C | -1.21769100 | -0.22380700 | 0.02016200  |
|                                   | H | -2.09292900 | 0.42525300  | -0.05488500 |
|                                   | H | -1.28393700 | -0.97021200 | -0.77713900 |
|                                   | H | -1.26342400 | -0.75877500 | 0.98373400  |
| CH <sub>3</sub> NHCOH             | N | -0.39237300 | -0.40735500 | -0.00004300 |
|                                   | H | -0.26240400 | -1.41117900 | 0.00000700  |
|                                   | C | 0.72354800  | 0.34508900  | -0.00002100 |
|                                   | H | 0.51116600  | 1.42752000  | -0.00004100 |
|                                   | O | 1.87061000  | -0.09158400 | 0.00002800  |
|                                   | C | -1.75118500 | 0.11795200  | 0.00003000  |
|                                   | H | -1.71122900 | 1.20761200  | -0.00088900 |
|                                   | H | -2.29528500 | -0.20972800 | -0.88859000 |
|                                   | H | -2.29469200 | -0.20831400 | 0.88953200  |
| CH <sub>3</sub> COMe              | C | -1.28081800 | -0.62908300 | 0.00000000  |
|                                   | H | -1.10840500 | -1.70535800 | -0.00000700 |
|                                   | H | -1.86902300 | -0.35773000 | 0.88074600  |
|                                   | H | -1.86903100 | -0.35771900 | -0.88073700 |
|                                   | C | 0.00569200  | 0.17391700  | 0.00000000  |
|                                   | O | -0.02111500 | 1.39208700  | 0.00000000  |
|                                   | C | 1.30354800  | -0.59506400 | 0.00000000  |
|                                   | H | 1.34401400  | -1.24823700 | 0.87790100  |
|                                   | H | 1.34401500  | -1.24823600 | -0.87790200 |
|                                   | H | 2.15682500  | 0.08197700  | 0.00000100  |
| CH <sub>3</sub> CONH <sub>2</sub> | C | 1.36082400  | -0.34156500 | -0.00000100 |
|                                   | H | 1.45709400  | -1.42766600 | -0.00027900 |
|                                   | H | 1.86353500  | 0.06192100  | 0.88135900  |
|                                   | H | 1.86372400  | 0.06242700  | -0.88101300 |
|                                   | C | -0.07661500 | 0.13741900  | -0.00001000 |
|                                   | O | -0.35859900 | 1.33435400  | 0.00000200  |
|                                   | N | -1.03042400 | -0.82602200 | -0.00001800 |
|                                   | H | -2.00327800 | -0.55732000 | 0.00008900  |
|                                   | H | -0.80456700 | -1.80716100 | 0.00002400  |
| CH <sub>3</sub> CF <sub>2</sub> H | C | 0.05062900  | 0.00072400  | 0.36315100  |
|                                   | H | 0.19087100  | 0.00030300  | 1.44438500  |
|                                   | F | 0.72074100  | -1.10408300 | -0.13588200 |
|                                   | F | 0.71962700  | 1.10433800  | -0.13609600 |
|                                   | C | -1.37791700 | -0.00067500 | -0.09442700 |

|                                                 |   |             |             |             |
|-------------------------------------------------|---|-------------|-------------|-------------|
|                                                 | H | -1.88455000 | -0.88808100 | 0.28859400  |
|                                                 | H | -1.88612500 | 0.88625300  | 0.28781500  |
|                                                 | H | -1.41977700 | -0.00106400 | -1.18533800 |
| CH <sub>3</sub> CFH <sub>2</sub>                | C | 0.09449500  | 0.55421300  | -0.00003500 |
|                                                 | H | 0.20096500  | 1.17574200  | 0.89108600  |
|                                                 | F | 1.19941500  | -0.33926200 | 0.00001500  |
|                                                 | C | -1.19631200 | -0.22873400 | -0.00001700 |
|                                                 | H | -1.27234000 | -0.85851600 | 0.88927200  |
|                                                 | H | -2.04081700 | 0.46664400  | 0.00005600  |
|                                                 | H | -1.27291100 | -0.85891800 | -0.88899000 |
|                                                 | H | 0.20126900  | 1.17553000  | -0.89124900 |
| <sup>•</sup> CH <sub>2</sub> NH <sub>2</sub>    | C | 0.72866700  | 0.00001100  | 0.07718200  |
|                                                 | H | 1.24332700  | -0.93220900 | -0.11624400 |
|                                                 | H | 1.24285400  | 0.93242600  | -0.11652100 |
|                                                 | N | -0.65439100 | -0.00000500 | -0.09154600 |
|                                                 | H | -1.13861300 | -0.83668900 | 0.20505200  |
|                                                 | H | -1.13882800 | 0.83644000  | 0.20544200  |
| <sup>•</sup> CH <sub>2</sub> CH=CF <sub>2</sub> | C | -0.43087500 | -0.04969900 | -0.00000600 |
|                                                 | C | 0.80388700  | -0.63610900 | 0.00008400  |
|                                                 | H | 0.79127500  | -1.72014600 | 0.00018500  |
|                                                 | C | 2.00790100  | 0.05066500  | 0.00005300  |
|                                                 | H | 2.94214700  | -0.49274000 | 0.00013000  |
|                                                 | H | 2.04534200  | 1.13218600  | -0.00004900 |
|                                                 | F | -0.64941900 | 1.26007800  | -0.00013600 |
|                                                 | F | -1.57994100 | -0.71657200 | 0.00002000  |
| <sup>•</sup> CH <sub>2</sub> CH=CH <sub>2</sub> | C | -1.22867500 | -0.19644100 | -0.00007800 |
| 2                                               | H | -2.15537600 | 0.36337100  | -0.00013300 |
|                                                 | H | -1.29629500 | -1.27933200 | 0.00012500  |
|                                                 | C | 0.00003200  | 0.44303900  | 0.00018900  |
|                                                 | H | 0.00007100  | 1.53126200  | -0.00026500 |
|                                                 | C | 1.22864800  | -0.19650900 | -0.00001300 |
|                                                 | H | 2.15527300  | 0.36354200  | -0.00023900 |
|                                                 | H | 1.29629600  | -1.27937400 | -0.00007100 |
| <sup>t</sup> Bu                                 | C | 1.47985300  | -0.12886800 | 0.01565300  |
|                                                 | H | 1.86371300  | -1.05302300 | -0.42816900 |
|                                                 | H | 2.01737200  | 0.71545300  | -0.42773500 |
|                                                 | H | 1.76157600  | -0.15364800 | 1.08424100  |
|                                                 | C | 0.00014400  | -0.00004900 | -0.16108100 |
|                                                 | C | -0.62829500 | 1.34575500  | 0.01564300  |
|                                                 | H | -1.62746800 | 1.38963600  | -0.42961700 |
|                                                 | H | -0.74979600 | 1.60125900  | 1.08418800  |
|                                                 | H | -0.01878700 | 2.14047800  | -0.42627300 |
|                                                 | C | -0.85157000 | -1.21691000 | 0.01564000  |
|                                                 | H | -1.01572400 | -1.44737300 | 1.08417300  |
|                                                 | H | -1.84305500 | -1.08719300 | -0.42989600 |
|                                                 | H | -0.38862200 | -2.10515500 | -0.42604000 |
| <sup>•</sup> CH <sub>2</sub> N=CH <sub>2</sub>  | C | 1.14180000  | 0.15634300  | -0.00008600 |
|                                                 | H | 2.07309100  | -0.39842300 | 0.00020000  |

|                             |   |             |             |             |
|-----------------------------|---|-------------|-------------|-------------|
|                             | H | 1.17809700  | 1.24931800  | -0.00009200 |
|                             | N | -0.00011800 | -0.51110100 | 0.00005800  |
|                             | C | -1.14156100 | 0.15622200  | 0.00000900  |
|                             | H | -2.07329200 | -0.39794200 | -0.00032400 |
|                             | H | -1.17850300 | 1.24936000  | 0.00027700  |
| $\cdot\text{CH}_2\text{Ph}$ | C | -1.13265600 | -1.21123300 | -0.00000400 |
|                             | C | 0.25193100  | -1.21814800 | -0.00000200 |
|                             | C | 0.99453800  | 0.00000000  | 0.00000100  |
|                             | C | 0.25193100  | 1.21814800  | -0.00000100 |
|                             | C | -1.13265600 | 1.21123300  | 0.00000400  |
|                             | C | -1.83803900 | 0.00000000  | 0.00000100  |
|                             | H | -1.67507200 | -2.15038300 | -0.00001500 |
|                             | H | 0.79111900  | -2.15951000 | -0.00000400 |
|                             | H | 0.79111900  | 2.15951000  | 0.00000200  |
|                             | H | -1.67507200 | 2.15038300  | 0.00001600  |
|                             | H | -2.92176600 | 0.00000000  | 0.00000100  |
|                             | C | 2.40026100  | 0.00000000  | 0.00000000  |
|                             | H | 2.95890700  | 0.92791800  | -0.00007800 |
|                             | H | 2.95890700  | -0.92791800 | 0.00008100  |
| $^i\text{Pr}$               | C | 0.00000000  | 0.53528000  | -0.04531000 |
|                             | H | 0.00000400  | 1.61041700  | 0.10137200  |
|                             | C | 1.29718300  | -0.19806800 | 0.00257000  |
|                             | H | 1.31632600  | -1.03096600 | -0.71213700 |
|                             | H | 2.14632100  | 0.45528000  | -0.21239200 |
|                             | H | 1.47790900  | -0.64695900 | 0.99434700  |
|                             | C | -1.29718400 | -0.19806600 | 0.00257200  |
|                             | H | -2.14633800 | 0.45532300  | -0.21220000 |
|                             | H | -1.31640300 | -1.03084400 | -0.71227600 |
|                             | H | -1.47781300 | -0.64713000 | 0.99428800  |
| $\cdot\text{CH}_2\text{SH}$ | C | 1.14623600  | 0.02202900  | -0.00038600 |
|                             | H | 1.64496300  | 0.97837600  | 0.00145900  |
|                             | H | 1.69352100  | -0.90811200 | 0.00022900  |
|                             | S | -0.58460600 | -0.08950100 | 0.00009200  |
|                             | H | -0.86220500 | 1.22958300  | -0.00084300 |
| $^n\text{Bu}$               | C | 1.88995700  | 0.11630600  | 0.00000700  |
|                             | H | 2.03105400  | 0.74655300  | 0.88369700  |
|                             | H | 2.03104700  | 0.74662800  | -0.88363300 |
|                             | H | 2.68062100  | -0.63922500 | -0.00003300 |
|                             | C | 0.50409600  | -0.53389300 | -0.00001000 |
|                             | H | 0.39638800  | -1.18057500 | -0.87757800 |
|                             | H | 0.39638100  | -1.18059500 | 0.87754500  |
|                             | C | -0.64411000 | 0.50979000  | -0.00000500 |
|                             | H | -0.51796200 | 1.15105600  | -0.88115500 |
|                             | H | -0.51794900 | 1.15106400  | 0.88113800  |
|                             | C | -2.00540900 | -0.09509100 | 0.00000700  |
|                             | H | -2.48337600 | -0.38879700 | 0.92758900  |
|                             | H | -2.48340800 | -0.38877800 | -0.92756500 |
| $^n\text{Pr}$               | C | -0.08095800 | 0.55132500  | 0.05107600  |
|                             | H | -0.10807300 | 1.32014300  | -0.73115000 |
|                             | H | -0.08502900 | 1.11650600  | 0.99995900  |

|                                     |   |             |             |             |
|-------------------------------------|---|-------------|-------------|-------------|
|                                     | C | -1.30514100 | -0.29365400 | -0.03056800 |
|                                     | H | -2.26185700 | 0.13531600  | -0.30510500 |
|                                     | H | -1.29306400 | -1.31992200 | 0.32085400  |
|                                     | C | 1.22919100  | -0.24273600 | -0.03806300 |
|                                     | H | 1.30810200  | -0.76306400 | -0.99678800 |
|                                     | H | 2.09637000  | 0.41539300  | 0.06196000  |
|                                     | H | 1.28500400  | -0.99398100 | 0.75560000  |
| *CH(CH <sub>3</sub> )CN             | C | -0.44502300 | 0.56625800  | 0.00001100  |
|                                     | H | -0.58833800 | 1.64120000  | 0.00011100  |
|                                     | C | -1.63110700 | -0.33792300 | 0.00000600  |
|                                     | H | -2.25696900 | -0.14104900 | 0.87828300  |
|                                     | H | -2.25750400 | -0.14032100 | -0.87772700 |
|                                     | H | -1.34810000 | -1.39004200 | -0.00050900 |
|                                     | C | 0.86100900  | 0.10713600  | -0.00011500 |
|                                     | N | 1.96309100  | -0.28323100 | 0.00006200  |
| *(CH <sub>2</sub> ) <sub>4</sub> CN | C | -1.43145200 | 2.56908100  | 0.00000000  |
|                                     | H | -1.36632500 | 3.12461200  | 0.92819200  |
|                                     | H | -1.36632500 | 3.12461200  | -0.92819200 |
|                                     | C | -1.42811600 | 1.07921600  | 0.00000000  |
|                                     | H | -1.95860000 | 0.70137200  | 0.88188000  |
|                                     | H | -1.95860000 | 0.70137200  | -0.88188000 |
|                                     | C | 0.00000000  | 0.47991200  | 0.00000000  |
|                                     | H | 0.54628200  | 0.82877200  | -0.88009800 |
|                                     | H | 0.54628200  | 0.82877200  | 0.88009800  |
|                                     | C | -0.04337500 | -1.06287700 | 0.00000000  |
|                                     | H | -0.58048800 | -1.43076600 | -0.87974000 |
|                                     | H | -0.58048800 | -1.43076600 | 0.87974000  |
|                                     | C | 1.28644300  | -1.66330700 | 0.00000000  |
|                                     | N | 2.34532200  | -2.12287500 | 0.00000000  |
| *(CH <sub>2</sub> ) <sub>3</sub> CN | C | -0.09513800 | 0.63057200  | -0.00000100 |
|                                     | H | 0.04158600  | 1.26346500  | 0.88055100  |
|                                     | H | 0.04158700  | 1.26346400  | -0.88055300 |
|                                     | C | 0.95414600  | -0.52791700 | 0.00000100  |
|                                     | H | 0.77096000  | -1.14726700 | 0.88255700  |
|                                     | H | 0.77096100  | -1.14726800 | -0.88255400 |
|                                     | C | -1.46646200 | 0.13223700  | -0.00000100 |
|                                     | N | -2.54171000 | -0.28731200 | -0.00000100 |
|                                     | C | 2.35121900  | -0.01468000 | 0.00000100  |
|                                     | H | 2.85213900  | 0.22875700  | -0.92915000 |
|                                     | H | 2.85214000  | 0.22875600  | 0.92915300  |
| Et                                  | C | -0.00982900 | -0.69350900 | 0.00000000  |
|                                     | H | -0.50460200 | -1.10064700 | 0.88717400  |
|                                     | H | -0.50460200 | -1.10064700 | -0.88717400 |
|                                     | H | 1.01369200  | -1.10298600 | 0.00000000  |
|                                     | C | -0.00982900 | 0.79405900  | 0.00000000  |
|                                     | H | 0.05673200  | 1.35048900  | -0.92723000 |
|                                     | H | 0.05673200  | 1.35048900  | 0.92723000  |
| *(CH <sub>2</sub> ) <sub>2</sub> CN | C | 0.55731000  | 0.59935800  | 0.03063700  |
|                                     | H | 0.66530700  | 1.20470200  | 0.94458100  |
|                                     | H | 0.68123500  | 1.30527500  | -0.79918600 |

|                                  |   |             |             |             |
|----------------------------------|---|-------------|-------------|-------------|
|                                  | C | 1.58882900  | -0.48309400 | -0.02694000 |
|                                  | H | 1.35246400  | -1.49883000 | 0.25681900  |
|                                  | H | 2.61404300  | -0.21133900 | -0.23736800 |
|                                  | C | -0.81662100 | 0.09967500  | -0.00178200 |
|                                  | N | -1.89859300 | -0.29934900 | -0.02519100 |
| •CH <sub>2</sub> F               | C | 0.02412900  | 0.66372700  | 0.00000000  |
|                                  | H | -0.18096900 | 1.11091800  | 0.96223600  |
|                                  | H | -0.18096900 | 1.11091800  | -0.96223600 |
|                                  | F | 0.02412900  | -0.68935500 | 0.00000000  |
| •CH <sub>2</sub> OH              | C | 0.03555300  | 0.68895600  | 0.00000000  |
|                                  | H | 0.18257500  | 1.19251900  | -0.94914800 |
|                                  | H | 0.18257500  | 1.19251900  | 0.94914800  |
|                                  | O | 0.03555300  | -0.68497000 | 0.00000000  |
|                                  | H | -0.86289000 | -1.03901400 | 0.00000000  |
| Me                               | C | 0.00000100  | 0.00001200  | 0.00000000  |
|                                  | H | -0.92996800 | 0.55122600  | 0.00000100  |
|                                  | H | 0.94240800  | 0.52967500  | 0.00000100  |
|                                  | H | -0.01244500 | -1.08097400 | 0.00000100  |
| •CH <sub>2</sub> CN              | C | -0.00781600 | -1.19857400 | 0.00000000  |
|                                  | H | -0.01166500 | -1.75023300 | 0.93290900  |
|                                  | H | -0.01166500 | -1.75023300 | -0.93290900 |
|                                  | C | 0.00000000  | 0.18226600  | 0.00000000  |
|                                  | N | 0.01003200  | 1.37118800  | 0.00000000  |
| •CH <sub>2</sub> CHO             | C | 1.16893600  | -0.17254300 | -0.00001100 |
|                                  | H | 2.05385900  | 0.45212000  | 0.00011000  |
|                                  | H | 1.27805300  | -1.25086400 | -0.00004100 |
|                                  | C | -0.12974500 | 0.40680800  | -0.00000800 |
|                                  | H | -0.18726200 | 1.50770300  | -0.00004600 |
|                                  | O | -1.17247400 | -0.26431900 | 0.00001100  |
| •CH <sub>2</sub> COOH            | C | -0.01279000 | 0.10757700  | -0.00000300 |
|                                  | O | -0.85958100 | -0.95455200 | 0.00001000  |
|                                  | H | -1.76691400 | -0.61314600 | -0.00002000 |
|                                  | O | -0.41635200 | 1.26186200  | -0.00000300 |
|                                  | C | 1.37663500  | -0.27846900 | -0.00000800 |
|                                  | H | 2.12549100  | 0.49998500  | 0.00007300  |
|                                  | H | 1.66581600  | -1.31996800 | -0.00004000 |
| •CHF <sub>2</sub>                | C | 0.02990200  | 0.51629700  | 0.00000000  |
|                                  | H | -0.71765600 | 1.30664000  | 0.00000000  |
|                                  | F | 0.02990200  | -0.24469000 | -1.09899900 |
|                                  | F | 0.02990200  | -0.24469000 | 1.09899900  |
| •CH <sub>2</sub> CF <sub>3</sub> | C | -1.50187300 | -0.00024600 | -0.02059600 |
|                                  | H | -2.02353000 | 0.94325700  | 0.04100400  |
|                                  | H | -2.02325700 | -0.94390800 | 0.04091400  |
|                                  | C | -0.02951700 | -0.00003300 | -0.01004000 |
|                                  | F | 0.48596400  | -0.00143700 | 1.25818600  |
|                                  | F | 0.49207300  | 1.09184300  | -0.62212400 |
|                                  | F | 0.49253200  | -1.09014800 | -0.62474000 |
| •CH <sub>2</sub> Cl              | C | 1.12953600  | 0.00001400  | -0.00144000 |
|                                  | H | 1.62328900  | 0.95805600  | 0.00335600  |
|                                  | H | 1.62327500  | -0.95812800 | 0.00335500  |

|                                    |    |             |             |             |
|------------------------------------|----|-------------|-------------|-------------|
|                                    | Cl | -0.58963400 | -0.00000100 | 0.00011300  |
| •CH <sub>2</sub> OCH <sub>3</sub>  | O  | -0.09456000 | -0.54175400 | -0.03332000 |
|                                    | C  | 1.14645600  | 0.16876200  | 0.01088300  |
|                                    | H  | 1.26595000  | 0.66739600  | 0.97715300  |
|                                    | H  | 1.93622800  | -0.56784500 | -0.12407600 |
|                                    | H  | 1.19148700  | 0.90996000  | -0.79335500 |
|                                    | C  | -1.20795800 | 0.22667400  | 0.06267300  |
|                                    | H  | -1.13645100 | 1.27780800  | -0.19814800 |
|                                    | H  | -2.13172300 | -0.32590100 | -0.03634300 |
| •CH <sub>2</sub> SCH <sub>3</sub>  | C  | -1.36137500 | 0.57671500  | 0.02831800  |
|                                    | H  | -1.14349700 | 1.61976300  | -0.15461500 |
|                                    | H  | -2.37855700 | 0.21265500  | 0.04480300  |
|                                    | S  | -0.11006500 | -0.60674900 | -0.01023800 |
|                                    | C  | 1.39347100  | 0.42814500  | 0.01054600  |
|                                    | H  | 1.43400600  | 1.01448000  | 0.92822200  |
|                                    | H  | 2.24443800  | -0.25098300 | -0.02712500 |
|                                    | H  | 1.41207000  | 1.08291300  | -0.86066800 |
| •CH <sub>2</sub> NHMe              | C  | 1.25874200  | -0.25181200 | 0.08389300  |
|                                    | H  | 1.25282200  | -1.28903700 | -0.22986600 |
|                                    | H  | 2.18816400  | 0.30203600  | 0.05054100  |
|                                    | N  | 0.09524600  | 0.46832000  | -0.12797700 |
|                                    | H  | 0.11805200  | 1.42270200  | 0.20513900  |
|                                    | C  | -1.19530600 | -0.18650400 | 0.03120400  |
|                                    | H  | -1.98896500 | 0.48292300  | -0.30335000 |
|                                    | H  | -1.22264000 | -1.08629500 | -0.58839500 |
| •CH <sub>2</sub> NHCOH             | C  | -1.76683900 | 0.12322000  | -0.00010500 |
|                                    | H  | -1.91145300 | 1.19185200  | 0.00017600  |
|                                    | H  | -2.58241000 | -0.57941200 | 0.00045300  |
|                                    | N  | -0.48167900 | -0.37115600 | 0.00000200  |
|                                    | H  | -0.35231900 | -1.37718000 | -0.00016600 |
|                                    | C  | 0.66741800  | 0.36439800  | -0.00000200 |
|                                    | H  | 0.48669500  | 1.44955600  | -0.00004200 |
|                                    | O  | 1.79097000  | -0.12655400 | 0.00002600  |
| •CH <sub>2</sub> COMe              | C  | 1.35575000  | -0.35350100 | -0.00000300 |
|                                    | H  | 1.55317400  | -0.97282300 | -0.87997600 |
|                                    | H  | 2.02893900  | 0.50265400  | -0.00037100 |
|                                    | H  | 1.55333000  | -0.97215600 | 0.88040900  |
|                                    | C  | -0.08374700 | 0.11659400  | -0.00000900 |
|                                    | O  | -0.36863600 | 1.32405000  | 0.00000000  |
|                                    | C  | -1.12596100 | -0.87400300 | 0.00000000  |
|                                    | H  | -0.90308500 | -1.93409700 | -0.00001500 |
|                                    | H  | -2.15951800 | -0.55052100 | 0.00002300  |
| •CH <sub>2</sub> CONH <sub>2</sub> | C  | -1.27937200 | -0.58997800 | -0.00001300 |
|                                    | H  | -1.33800500 | -1.67127000 | 0.00000100  |
|                                    | H  | -2.18939700 | -0.00691000 | 0.00019600  |
|                                    | C  | -0.01107900 | 0.12154500  | -0.00002900 |
|                                    | O  | 0.04453300  | 1.35990100  | 0.00002600  |
|                                    | N  | 1.11602700  | -0.64832200 | -0.00019700 |
|                                    | H  | 2.01792300  | -0.19744100 | 0.00057300  |

|                                    |            |             |             |             |
|------------------------------------|------------|-------------|-------------|-------------|
|                                    | H          | 1.08372300  | -1.65473600 | 0.00065500  |
| •CH <sub>2</sub> CF <sub>2</sub> H | C          | 1.40351900  | -0.04037500 | -0.10765000 |
|                                    | H          | 2.21506600  | 0.16465100  | 0.57553100  |
|                                    | H          | 1.59846100  | -0.21723700 | -1.15741700 |
|                                    | C          | 0.01107700  | 0.00144700  | 0.36413500  |
|                                    | H          | -0.11121600 | 0.02936700  | 1.44563300  |
|                                    | F          | -0.65203800 | 1.11663700  | -0.15281400 |
|                                    | F          | -0.70239400 | -1.08810500 | -0.11414800 |
| •CH <sub>2</sub> CFH <sub>2</sub>  | C          | 1.23845700  | -0.20604800 | -0.00018200 |
|                                    | H          | 1.68360400  | -0.53130000 | -0.93205200 |
|                                    | H          | 1.67628900  | -0.54782700 | 0.92927200  |
|                                    | C          | -0.02726000 | 0.55063700  | 0.00167500  |
|                                    | H          | -0.15527900 | 1.15726000  | 0.89834300  |
|                                    | F          | -1.14640700 | -0.36761300 | -0.00147600 |
|                                    | H          | -0.15413600 | 1.16285200  | -0.89123700 |
| TS1                                | C          | -0.48410700 | 0.00001900  | 0.62893700  |
|                                    | C          | -2.02723100 | 0.67751800  | -0.88769300 |
|                                    | C          | -2.02720800 | -0.67763800 | -0.88764800 |
|                                    | H          | -2.61300800 | 1.37876800  | -1.45645400 |
|                                    | H          | -2.61295900 | -1.37894100 | -1.45637100 |
|                                    | N          | -1.08717400 | -1.08393800 | 0.04578200  |
|                                    | N          | -1.08720900 | 1.08391500  | 0.04570400  |
|                                    | C          | -0.75181400 | -2.47124500 | 0.33595400  |
|                                    | H          | -1.47652300 | -3.11608800 | -0.15861700 |
|                                    | H          | 0.24966300  | -2.70900100 | -0.02847100 |
|                                    | H          | -0.78443500 | -2.64588800 | 1.41110200  |
|                                    | C          | -0.75191100 | 2.47125600  | 0.33578500  |
|                                    | H          | -0.78472700 | 2.64602700  | 1.41090800  |
|                                    | H          | 0.24962700  | 2.70898200  | -0.02848700 |
|                                    | H          | -1.47653800 | 3.11603000  | -0.15899400 |
|                                    | H          | 1.83112900  | 0.00015600  | 0.88033400  |
|                                    | B          | 0.69951700  | 0.00008500  | 1.64290500  |
|                                    | H          | 0.77621200  | -1.01822000 | 2.29330500  |
|                                    | H          | 0.77609100  | 1.01840000  | 2.29330300  |
|                                    | C          | 3.21845500  | 0.00022100  | 0.09977700  |
|                                    | H          | 3.64302200  | -0.91503800 | 0.50264200  |
|                                    | H          | 3.64265200  | 0.91587300  | 0.50213900  |
|                                    | N          | 2.96501800  | -0.00022000 | -1.29058000 |
| H                                  | 3.24511100 | 0.83236500  | -1.78916200 |             |
| H                                  | 3.24555100 | -0.83292400 | -1.78871700 |             |
| TS2                                | C          | 1.51752500  | -0.15632700 | 0.62784200  |
|                                    | C          | 2.66593200  | 0.64394500  | -1.14692900 |
|                                    | C          | 2.04963800  | 1.69600900  | -0.55309000 |
|                                    | H          | 3.30709400  | 0.60124300  | -2.01015800 |
|                                    | H          | 2.05060200  | 2.74287100  | -0.80254400 |
|                                    | N          | 1.35280100  | 1.19583500  | 0.53289400  |
|                                    | N          | 2.33425700  | -0.48361800 | -0.41640600 |
|                                    | C          | 0.51390300  | 1.99629200  | 1.41897100  |
|                                    | H          | -0.54132000 | 1.78086800  | 1.24094400  |

|            |   |             |             |             |
|------------|---|-------------|-------------|-------------|
|            | H | 0.75152800  | 1.77155500  | 2.45764200  |
|            | H | 0.70618400  | 3.04922100  | 1.22117200  |
|            | C | 2.78831500  | -1.83616000 | -0.72485300 |
|            | H | 3.45814900  | -1.78818500 | -1.58137100 |
|            | H | 3.31927900  | -2.25810000 | 0.12815200  |
|            | H | 1.93901100  | -2.47592600 | -0.96623600 |
|            | H | 1.39754300  | -2.19256400 | 1.75669000  |
|            | H | 0.49164200  | -0.60844900 | 2.67278900  |
|            | B | 0.83621300  | -1.13117700 | 1.64131200  |
|            | H | -0.37163300 | -1.45411400 | 1.05051700  |
|            | C | -1.68967500 | -1.94355300 | 0.47541900  |
|            | H | -1.84311600 | -2.77600100 | 1.15282800  |
|            | H | -1.30764800 | -2.22605800 | -0.50033300 |
|            | C | -2.66478100 | -0.88981100 | 0.53162500  |
|            | H | -3.25138700 | -0.75226600 | 1.43291400  |
|            | C | -2.86362200 | 0.03520800  | -0.41689500 |
|            | F | -3.73938000 | 1.04636900  | -0.33737100 |
|            | F | -2.26059900 | 0.06281500  | -1.61235300 |
| <b>TS3</b> | C | 0.82486000  | 0.10604600  | 0.61225300  |
|            | C | 1.77813900  | -1.47417400 | -0.69190100 |
|            | C | 2.36735000  | -0.28991600 | -0.99159300 |
|            | H | 1.94852300  | -2.46197700 | -1.08342200 |
|            | H | 3.14919800  | -0.05207100 | -1.69173100 |
|            | N | 1.77676600  | 0.66986200  | -0.18880500 |
|            | N | 0.83817000  | -1.22105300 | 0.29156200  |
|            | C | 2.11775500  | 2.08934600  | -0.20526300 |
|            | H | 2.96188300  | 2.23369400  | -0.87711100 |
|            | H | 1.27155500  | 2.68022800  | -0.55762500 |
|            | H | 2.38983900  | 2.42145200  | 0.79615200  |
|            | C | -0.05312700 | -2.22484400 | 0.86448500  |
|            | H | 0.27651200  | -3.20845300 | 0.53454600  |
|            | H | -0.01801800 | -2.17574300 | 1.95191400  |
|            | H | -1.07909300 | -2.05371700 | 0.53130700  |
|            | H | -0.58777300 | 0.12934600  | 2.46708200  |
|            | H | 0.23232900  | 1.92536100  | 1.94598300  |
|            | B | -0.14508500 | 0.83534700  | 1.59522200  |
|            | H | -1.25823600 | 1.09631400  | 0.81226200  |
|            | C | -2.56912200 | 1.44750900  | 0.15847300  |
|            | H | -2.30056100 | 2.45736800  | -0.13579700 |
|            | H | -3.17212900 | 1.39162200  | 1.06121000  |
|            | C | -2.83973200 | 0.49765900  | -0.88198900 |
|            | H | -2.40172800 | 0.70936600  | -1.85669300 |
|            | C | -3.52036300 | -0.66979800 | -0.73713100 |
|            | H | -3.98093600 | -0.94402600 | 0.20750600  |



|            |            |             |             |             |
|------------|------------|-------------|-------------|-------------|
|            | H          | -3.64505500 | -1.35812000 | -1.56500500 |
| <b>TS4</b> | C          | -3.64097800 | -0.24991600 | 0.84082500  |
|            | H          | -3.47766700 | -1.21005600 | 1.34047000  |
|            | H          | -3.62534400 | 0.53527700  | 1.60336900  |
|            | H          | -4.65980300 | -0.27226300 | 0.41865000  |
|            | C          | -2.61549000 | 1.37984400  | -0.82845900 |
|            | H          | -1.74477600 | 1.54186600  | -1.47280000 |
|            | H          | -3.51130600 | 1.54441900  | -1.45047100 |
|            | H          | -2.61435800 | 2.15439800  | -0.05459900 |
|            | C          | -2.38679200 | -1.13101100 | -1.19680300 |
|            | H          | -3.25643700 | -1.26970000 | -1.86083000 |
|            | H          | -1.51981400 | -0.94432300 | -1.83933500 |
|            | H          | -2.22646100 | -2.08114600 | -0.67648800 |
|            | C          | -2.61030600 | -0.00066200 | -0.22778700 |
|            | H          | -1.23305600 | -0.00032600 | 0.61134000  |
|            | B          | -0.19243500 | -0.00063600 | 1.46792700  |
|            | C          | 1.10335700  | 0.00010100  | 0.59148800  |
|            | H          | -0.32675400 | -1.01836400 | 2.10917900  |
|            | H          | -0.32732000 | 1.01581500  | 2.11123700  |
|            | N          | 1.76871300  | 1.08275300  | 0.08627700  |
|            | N          | 1.77045800  | -1.08213700 | 0.08752200  |
|            | C          | 2.81966600  | 0.67839900  | -0.72071800 |
|            | C          | 1.40791900  | 2.47127600  | 0.34596800  |
|            | C          | 2.82059000  | -0.67703500 | -0.72013000 |
|            | C          | 1.40929300  | -2.47092800 | 0.34507700  |
|            | H          | 3.46972700  | 1.38089600  | -1.21279700 |
|            | H          | 2.14405200  | 3.11601300  | -0.13103100 |
|            | H          | 0.41894400  | 2.69013800  | -0.05983500 |
|            | H          | 1.39832000  | 2.66256400  | 1.41893200  |
|            | H          | 3.47140800  | -1.37907500 | -1.21186200 |
|            | H          | 2.15203700  | -3.11511100 | -0.12234100 |
| H          | 1.38760400 | -2.66029200 | 1.41811600  |             |
| H          | 0.42544000 | -2.69227700 | -0.07189400 |             |
| <b>TS5</b> | C          | 0.78542700  | -0.09236900 | 0.59735900  |
|            | C          | 2.41432900  | 0.19392900  | -0.93843200 |
|            | C          | 1.86592200  | 1.41052400  | -0.69385000 |
|            | H          | 3.21489200  | -0.09587200 | -1.59650200 |
|            | H          | 2.09678300  | 2.37969300  | -1.10035600 |
|            | N          | 0.87195500  | 1.22295100  | 0.24926500  |
|            | N          | 1.74505100  | -0.71757400 | -0.14287300 |
|            | C          | 0.00398200  | 2.27960800  | 0.76046000  |
|            | H          | 0.36645700  | 3.23516300  | 0.38613600  |
|            | H          | -1.02188300 | 2.12119500  | 0.42127800  |
|            | H          | 0.02290800  | 2.28435400  | 1.84935000  |

|            |   |             |             |             |
|------------|---|-------------|-------------|-------------|
|            | C | 2.01583300  | -2.15282600 | -0.11640400 |
|            | H | 2.86687600  | -2.35479700 | -0.76403100 |
|            | H | 2.24791500  | -2.47240300 | 0.89897100  |
|            | H | 1.14942600  | -2.70812700 | -0.47640100 |
|            | H | 0.07329800  | -1.83394700 | 1.98083300  |
|            | B | -0.25654400 | -0.75475700 | 1.55909600  |
|            | H | -1.31773900 | -1.04312800 | 0.72914500  |
|            | C | -2.57819500 | -1.38588300 | 0.02528600  |
|            | H | -2.28041300 | -2.37086200 | -0.32149200 |
|            | H | -3.21398300 | -1.37952200 | 0.91660000  |
|            | C | -3.43029200 | 0.64484900  | -0.65195800 |
|            | H | -3.56734600 | 1.40481100  | -1.41566400 |
|            | H | -3.86513600 | 0.82602800  | 0.33759600  |
|            | N | -2.79117400 | -0.44937000 | -0.94955500 |
|            | H | -0.73220900 | 0.00216300  | 2.36642900  |
| <b>TS6</b> | C | 2.66256800  | -0.25055200 | -1.75462700 |
|            | C | 1.94470100  | 0.82247500  | -1.24070800 |
|            | C | 1.96630500  | 1.12791600  | 0.14253500  |
|            | C | 2.73951000  | 0.28556300  | 0.97911900  |
|            | C | 3.45555900  | -0.78635900 | 0.45997200  |
|            | C | 3.42558200  | -1.06573800 | -0.91090400 |
|            | H | 2.63306000  | -0.45394100 | -2.82019700 |
|            | H | 1.36094500  | 1.44818500  | -1.90880500 |
|            | H | 2.77601700  | 0.49200600  | 2.04423400  |
|            | H | 4.04554200  | -1.40874600 | 1.12501600  |
|            | H | 3.98772400  | -1.90032600 | -1.31407500 |
|            | C | 1.17488700  | 2.20307200  | 0.68672000  |
|            | H | 0.81207400  | 2.96058100  | -0.00104500 |
|            | H | 1.43708800  | 2.57606100  | 1.67158900  |
|            | H | -0.19995000 | 1.63456200  | 1.08228100  |
|            | B | -1.41179300 | 1.23737200  | 1.58383700  |
|            | C | -1.89014100 | 0.12207800  | 0.59607200  |
|            | H | -2.08994600 | 2.23507000  | 1.56035900  |
|            | H | -1.13471200 | 0.82600700  | 2.68408100  |
|            | N | -1.57000100 | -1.20418700 | 0.62479000  |
|            | N | -2.64220000 | 0.27700300  | -0.53255900 |
|            | C | -2.10538300 | -1.85767400 | -0.47069400 |
|            | C | -0.74083900 | -1.83799000 | 1.64557700  |
|            | C | -2.77808300 | -0.92958000 | -1.19585100 |
|            | C | -3.20704600 | 1.54301800  | -0.99007900 |
|            | H | -1.96864200 | -2.91243800 | -0.63442300 |
|            | H | -0.75963600 | -2.91458900 | 1.48637400  |
|            | H | 0.28724100  | -1.47855300 | 1.57567100  |
|            | H | -1.13212000 | -1.60987800 | 2.63618400  |

|            |   |             |             |             |
|------------|---|-------------|-------------|-------------|
|            | H | -3.34011800 | -1.02377100 | -2.10873100 |
|            | H | -3.84138800 | 1.34677900  | -1.85255800 |
|            | H | -3.80164100 | 1.99528000  | -0.19724300 |
|            | H | -2.41288900 | 2.23376700  | -1.27630800 |
| <b>TS7</b> | C | -0.82552200 | 0.01952800  | 0.60215200  |
|            | C | -2.35347700 | 0.76344300  | -0.89276300 |
|            | C | -2.43314900 | -0.58953600 | -0.86987000 |
|            | H | -2.90808900 | 1.48971700  | -1.46127000 |
|            | H | -3.07035600 | -1.26499700 | -1.41384800 |
|            | N | -1.49747900 | -1.03415700 | 0.04977600  |
|            | N | -1.37035100 | 1.12570600  | 0.01352500  |
|            | H | 0.47827100  | 0.98371300  | 2.26283500  |
|            | H | 0.38101800  | -1.04679200 | 2.27407800  |
|            | B | 0.37014300  | -0.03243700 | 1.61346900  |
|            | H | 1.49212300  | -0.08754900 | 0.87987500  |
|            | C | 2.95515300  | -0.14805200 | 0.15886700  |
|            | H | 3.55444600  | -0.30262400 | 1.05500200  |
|            | C | 3.09146600  | 1.20732200  | -0.47429300 |
|            | H | 2.29024200  | 1.38857600  | -1.20111300 |
|            | H | 3.05652900  | 2.00768600  | 0.27088000  |
|            | H | 4.04229300  | 1.31278900  | -1.02078200 |
|            | C | -1.24385400 | -2.43572400 | 0.36322800  |
|            | H | -0.24544600 | -2.72562400 | 0.03169200  |
|            | H | -1.31950900 | -2.59859500 | 1.43786400  |
|            | H | -1.98543900 | -3.04525500 | -0.15016900 |
|            | C | 2.84785900  | -1.33868700 | -0.75095200 |
|            | H | 2.64594900  | -2.25841600 | -0.19348300 |
|            | H | 2.04401700  | -1.20636200 | -1.48534100 |
|            | H | 3.77431000  | -1.50356800 | -1.32397100 |
|            | C | -0.94957300 | 2.49656700  | 0.27938400  |
|            | H | -1.00413800 | 2.70403700  | 1.34759700  |
|            | H | 0.07657600  | 2.65171200  | -0.05806000 |
|            | H | -1.61211400 | 3.17372100  | -0.25675900 |
| <b>TS8</b> | C | -0.94320300 | -0.08703500 | 0.58760100  |
|            | C | -2.10060600 | 1.30130100  | -0.76833500 |
|            | C | -2.56219400 | 0.04466100  | -0.98341600 |
|            | H | -2.38755000 | 2.24048600  | -1.20839700 |
|            | H | -3.32936400 | -0.31873000 | -1.64473900 |
|            | N | -1.84675100 | -0.79581900 | -0.14741200 |
|            | N | -1.11207400 | 1.20790000  | 0.19645000  |
|            | C | -2.02555800 | -2.24298200 | -0.07375000 |
|            | H | -2.82506000 | -2.52727900 | -0.75544300 |
|            | H | -1.10635100 | -2.75282500 | -0.36294600 |
|            | H | -2.29063100 | -2.53813000 | 0.94119300  |

|            |   |             |             |             |
|------------|---|-------------|-------------|-------------|
|            | C | -0.33071200 | 2.33451500  | 0.69777700  |
|            | H | -0.71592600 | 3.24869700  | 0.24996400  |
|            | H | -0.41558700 | 2.39653100  | 1.78219800  |
|            | H | 0.71938300  | 2.21298700  | 0.42865300  |
|            | H | 0.48659600  | 0.16606800  | 2.40431100  |
|            | H | -0.17713000 | -1.72413100 | 2.05329400  |
|            | B | 0.12875700  | -0.65093000 | 1.58717800  |
|            | H | 1.21617600  | -0.88372800 | 0.83685300  |
|            | C | 2.59529100  | -1.24602000 | 0.04391700  |
|            | H | 3.15882800  | -1.75269600 | 0.82183700  |
|            | H | 2.20840400  | -1.89539800 | -0.73541100 |
|            | S | 3.37700900  | 0.19107500  | -0.66277500 |
|            | H | 3.69594800  | 0.81439600  | 0.49112600  |
| <b>TS9</b> | C | -1.65349700 | -0.00014400 | 0.48118500  |
|            | C | -3.47829700 | 0.67793800  | -0.66918000 |
|            | C | -3.47839200 | -0.67765500 | -0.66936500 |
|            | H | -4.16927700 | 1.38129300  | -1.10038200 |
|            | H | -4.16947600 | -1.38079400 | -1.10075000 |
|            | N | -2.35775100 | -1.08087100 | 0.03792200  |
|            | N | -2.35760100 | 1.08080500  | 0.03822000  |
|            | C | -1.97664200 | -2.47103000 | 0.26756900  |
|            | H | -2.74445900 | -3.11436500 | -0.15829200 |
|            | H | -1.01974200 | -2.68652100 | -0.20880800 |
|            | H | -1.89124100 | -2.66485700 | 1.33646500  |
|            | C | -1.97624100 | 2.47084400  | 0.26816200  |
|            | H | -2.74410900 | 3.11440800  | -0.15726000 |
|            | H | -1.89048000 | 2.66433400  | 1.33709000  |
|            | H | -1.01946000 | 2.68635900  | -0.20844900 |
|            | H | -0.09146900 | 1.01534000  | 1.86953600  |
|            | H | -0.09133500 | -1.01646100 | 1.86877000  |
|            | B | -0.27766600 | -0.00033600 | 1.23800500  |
|            | H | 0.65384200  | 0.00013600  | 0.28115500  |
|            | C | 1.94294200  | 0.00081700  | -0.76259200 |
|            | C | 3.16511100  | -0.00012100 | 0.11105600  |
|            | H | 1.72524000  | -0.91082600 | -1.31614200 |
|            | H | 1.72550300  | 0.91347100  | -1.31457800 |
|            | H | 3.14737300  | -0.87840000 | 0.76934000  |
|            | H | 3.14748000  | 0.87683500  | 0.77110300  |
|            | C | 4.50172900  | 0.00059100  | -0.66227700 |
|            | H | 4.53517300  | 0.87846700  | -1.31812000 |
|            | H | 4.53486200  | -0.87566800 | -1.32029900 |
|            | C | 5.72585800  | -0.00077500 | 0.25981200  |
|            | H | 6.65795700  | -0.00014300 | -0.31286600 |
|            | H | 5.73211100  | 0.88168800  | 0.90779300  |

|             |             |             |             |             |
|-------------|-------------|-------------|-------------|-------------|
|             | H           | 5.73187400  | -0.88494700 | 0.90545600  |
| <b>TS10</b> | C           | -1.11582000 | -0.00001900 | 0.48113400  |
|             | C           | -2.90158900 | 0.67790000  | -0.72880800 |
|             | C           | -2.90166600 | -0.67770900 | -0.72882300 |
|             | H           | -3.57788400 | 1.38120400  | -1.18278800 |
|             | H           | -3.57804200 | -1.38092900 | -1.18281200 |
|             | N           | -1.80503000 | -1.08078300 | 0.01518300  |
|             | N           | -1.80490900 | 1.08083400  | 0.01520900  |
|             | C           | -1.43099900 | -2.47091700 | 0.25668200  |
|             | H           | -2.18648300 | -3.11443000 | -0.19039500 |
|             | H           | -0.46095700 | -2.68695700 | -0.19210400 |
|             | H           | -1.37615500 | -2.66379500 | 1.32773100  |
|             | C           | -1.43071500 | 2.47092300  | 0.25672300  |
|             | H           | -2.18625700 | 3.11452800  | -0.19012000 |
|             | H           | -1.37559900 | 2.66370400  | 1.32777300  |
|             | H           | -0.46076200 | 2.68692900  | -0.19227800 |
|             | H           | 0.39999400  | 1.01581100  | 1.91932100  |
|             | H           | 0.39989300  | -1.01610800 | 1.91924200  |
|             | B           | 0.23478800  | -0.00011700 | 1.28243000  |
|             | H           | 1.19585800  | -0.00011200 | 0.35646200  |
|             | C           | 2.51938300  | -0.00007100 | -0.64593700 |
|             | C           | 3.71048900  | 0.00009600  | 0.27024900  |
|             | H           | 2.32201500  | -0.91250500 | -1.20594400 |
|             | H           | 2.32185600  | 0.91223700  | -1.20609400 |
|             | H           | 3.66796700  | -0.87672700 | 0.92751800  |
|             | H           | 3.66801200  | 0.87720200  | 0.92714300  |
|             | C           | 5.06576300  | -0.00009800 | -0.46562300 |
|             | H           | 5.16672700  | 0.88340700  | -1.10328300 |
|             | H           | 5.89970200  | 0.00002000  | 0.24507700  |
|             | H           | 5.16666800  | -0.88387400 | -1.10291700 |
|             | <b>TS11</b> | C           | 0.96058500  | 0.08495800  |
| C           |             | 2.53576000  | 0.23838500  | 0.98754900  |
| C           |             | 2.28102900  | -1.07964700 | 0.78963900  |
| H           |             | 3.22093200  | 0.72923000  | 1.65651300  |
| H           |             | 2.69997100  | -1.95409700 | 1.25637400  |
| N           |             | 1.31870200  | -1.15989700 | -0.19926100 |
| N           |             | 1.72263300  | 0.94059000  | 0.11730600  |
| H           |             | -0.07066700 | 1.57883900  | -2.08791300 |
| H           |             | -0.32779800 | -0.40143600 | -2.50310200 |
| B           |             | -0.14922000 | 0.45161800  | -1.66905600 |
| H           |             | -1.31281500 | 0.42816400  | -0.96552400 |
| C           |             | -2.73537600 | 0.46445000  | -0.31103900 |
| H           |             | -3.29937200 | 0.45760000  | -1.23964800 |
| C           |             | -2.72691200 | 1.76601400  | 0.46065500  |

|             |   |             |             |             |
|-------------|---|-------------|-------------|-------------|
|             | H | -2.01981000 | 1.72935100  | 1.29244500  |
|             | H | -2.43900000 | 2.58709200  | -0.19920400 |
|             | H | -3.71656700 | 1.99580200  | 0.87107300  |
|             | C | 0.72868900  | -2.40810800 | -0.67994200 |
|             | H | -0.28444100 | -2.52182800 | -0.29081300 |
|             | H | 0.69797300  | -2.40429500 | -1.76787900 |
|             | H | 1.34552200  | -3.23604500 | -0.33560800 |
|             | C | 1.67765300  | 2.39838200  | 0.02412600  |
|             | H | 1.78640000  | 2.70798200  | -1.01379400 |
|             | H | 0.73095700  | 2.77582300  | 0.41259900  |
|             | H | 2.49710200  | 2.80573500  | 0.61311000  |
|             | C | -2.81035800 | -0.74593800 | 0.40581800  |
|             | N | -2.78829300 | -1.75883500 | 0.98287400  |
| <b>TS12</b> | C | 2.53779900  | -0.00064700 | 0.46182900  |
|             | C | 4.30074500  | 0.69449900  | -0.77018400 |
|             | C | 4.31426600  | -0.66112400 | -0.76985400 |
|             | H | 4.96426700  | 1.40439400  | -1.23264000 |
|             | H | 4.99182500  | -1.35776000 | -1.23211500 |
|             | N | 3.23127600  | -1.07452400 | -0.01196600 |
|             | N | 3.20973800  | 1.08659300  | -0.01253800 |
|             | C | 2.87330600  | -2.46860200 | 0.23309400  |
|             | H | 2.82388000  | -2.65973100 | 1.30458000  |
|             | H | 1.90456900  | -2.69615200 | -0.21280400 |
|             | H | 3.63466200  | -3.10439200 | -0.21495700 |
|             | C | 2.82454000  | 2.47336600  | 0.23245200  |
|             | H | 1.84900900  | 2.68014600  | -0.20864700 |
|             | H | 2.77686600  | 2.66528300  | 1.30390900  |
|             | H | 3.57028000  | 3.12390200  | -0.22067800 |
|             | H | 1.04900400  | -1.03140700 | 1.91886200  |
|             | H | 1.03035200  | 1.00048400  | 1.92041600  |
|             | B | 1.19701700  | -0.01356800 | 1.28130200  |
|             | C | -1.10210100 | -0.03226300 | -0.62858500 |
|             | H | -0.91802900 | -0.96016800 | -1.16574100 |
|             | H | -0.90182800 | 0.86523000  | -1.20979200 |
|             | C | -2.27997800 | 0.00017800  | 0.30229900  |
|             | H | -2.23040300 | 0.89729900  | 0.93175200  |
|             | H | -2.23804700 | -0.85892900 | 0.98331500  |
|             | H | 0.22663800  | -0.02133900 | 0.36665200  |
|             | C | -3.64030100 | -0.01553400 | -0.42404000 |
|             | H | -3.71927300 | -0.91307400 | -1.04411200 |
|             | H | -3.71273300 | 0.84539600  | -1.09475600 |
|             | C | -4.81794800 | 0.01737500  | 0.57571800  |
|             | H | -4.76393700 | 0.91420400  | 1.20078300  |
|             | H | -4.77151300 | -0.84400400 | 1.24936800  |

|             |   |             |             |             |
|-------------|---|-------------|-------------|-------------|
|             | C | -6.11966800 | 0.00485600  | -0.08269600 |
|             | N | -7.14024600 | -0.00552100 | -0.62265300 |
| <b>TS13</b> | C | 3.79282200  | -0.67810300 | -0.58107500 |
|             | H | 4.50413500  | -1.38149300 | -0.97762100 |
|             | C | 3.79297900  | 0.67769400  | -0.58116000 |
|             | H | 4.50446700  | 1.38086800  | -0.97777500 |
|             | N | 2.63976600  | 1.08037900  | 0.07105100  |
|             | C | 2.24778500  | 2.47142600  | 0.28044200  |
|             | H | 1.32300700  | 2.69016400  | -0.25423000 |
|             | H | 2.09706600  | 2.66187400  | 1.34241000  |
|             | H | 3.04217400  | 3.11373000  | -0.09510000 |
|             | N | 2.63952900  | -1.08044100 | 0.07120800  |
|             | C | 2.24715300  | -2.47136800 | 0.28065100  |
|             | H | 3.04160500  | -3.11390000 | -0.09436600 |
|             | H | 2.09584700  | -2.66158300 | 1.34257400  |
|             | H | 1.32259500  | -2.69002500 | -0.25444500 |
|             | C | 1.91604800  | 0.00007900  | 0.47872900  |
|             | H | 0.29469800  | -1.01526000 | 1.79957800  |
|             | B | 0.50700700  | 0.00026700  | 1.17721400  |
|             | H | -0.38199600 | 0.00014800  | 0.18655700  |
|             | C | -1.64754000 | -0.00014000 | -0.89228000 |
|             | H | -1.42538800 | 0.91379700  | -1.43791900 |
|             | H | -1.42525800 | -0.91422800 | -1.43760900 |
|             | C | -2.86579300 | -0.00006500 | -0.01854600 |
|             | H | -2.86588300 | 0.87892300  | 0.63324000  |
|             | H | -2.86599500 | -0.87904900 | 0.63324300  |
|             | C | -4.19072600 | 0.00002400  | -0.83688000 |
|             | H | -4.23609100 | 0.88000000  | -1.48452100 |
|             | H | -4.23621500 | -0.87994100 | -1.48452600 |
|             | C | -5.37719200 | 0.00010600  | 0.01508000  |
|             | N | -6.29527100 | 0.00016600  | 0.71565400  |
|             | H | 0.29480900  | 1.01599100  | 1.79929400  |
| <b>TS14</b> | C | 0.53798200  | 0.00002000  | 0.45854900  |
|             | C | 2.41721300  | -0.67746100 | -0.60130900 |
|             | C | 2.41697500  | 0.67807400  | -0.60136400 |
|             | H | 3.12883400  | -1.38044100 | -0.99809800 |
|             | H | 3.12834600  | 1.38127100  | -0.99821600 |
|             | N | 1.26309300  | 1.08105600  | 0.05044800  |
|             | N | 1.26347000  | -1.08079200 | 0.05052800  |
|             | C | 0.87047300  | 2.47109400  | 0.25986100  |
|             | H | 1.66138000  | 3.11452100  | -0.12135700 |
|             | H | -0.05816900 | 2.68789300  | -0.26913400 |
|             | H | 0.72537600  | 2.66360000  | 1.32250200  |
|             | C | 0.87131900  | -2.47094300 | 0.26006700  |

|             |   |             |             |             |
|-------------|---|-------------|-------------|-------------|
|             | H | 1.66219800  | -3.11414500 | -0.12158800 |
|             | H | 0.72680000  | -2.66355800 | 1.32277100  |
|             | H | -0.05753000 | -2.68793800 | -0.26847700 |
|             | H | -1.08787800 | -1.01597100 | 1.77076400  |
|             | H | -1.08849700 | 1.01556600  | 1.77039500  |
|             | B | -0.87211800 | -0.00024700 | 1.14859400  |
|             | H | -1.76005300 | -0.00073700 | 0.15066200  |
|             | C | -3.01459600 | -0.00137100 | -0.93085600 |
|             | C | -4.25913000 | 0.00064700  | -0.09005500 |
|             | H | -2.78060400 | -0.91398400 | -1.47440600 |
|             | H | -2.77932500 | 0.90939800  | -1.47694200 |
|             | H | -4.30510100 | 0.88489200  | 0.55377400  |
|             | H | -5.17622600 | 0.00045700  | -0.69795700 |
|             | H | -4.30631800 | -0.88179800 | 0.55615200  |
| <b>TS15</b> | C | -3.17937500 | 0.68506200  | -0.76219200 |
|             | H | -3.84808500 | 1.39164800  | -1.22213900 |
|             | C | -3.18478100 | -0.67093300 | -0.76305400 |
|             | H | -3.85908900 | -1.37154500 | -1.22396400 |
|             | N | -2.09778400 | -1.07761400 | -0.00833900 |
|             | C | -1.72994300 | -2.47083600 | 0.23304200  |
|             | H | -0.76320300 | -2.69166100 | -0.22006000 |
|             | H | -1.67306100 | -2.66220900 | 1.30379800  |
|             | H | -2.49074400 | -3.10982800 | -0.21104700 |
|             | N | -2.08916800 | 1.08211600  | -0.00700300 |
|             | C | -1.71061000 | 2.47207200  | 0.23658900  |
|             | H | -2.46469600 | 3.11761100  | -0.20948600 |
|             | H | -1.65553900 | 2.66230700  | 1.30765900  |
|             | H | -0.74067300 | 2.68517500  | -0.21332200 |
|             | C | -1.41150100 | -0.00076300 | 0.46323700  |
|             | H | 0.08173600  | 1.00741200  | 1.93364400  |
|             | B | -0.07079500 | -0.00660400 | 1.29182600  |
|             | H | 0.89609900  | -0.00964500 | 0.39090700  |
|             | C | 2.27680000  | -0.01222100 | -0.57801400 |
|             | H | 2.13907800  | -0.93441600 | -1.13319700 |
|             | H | 2.13204800  | 0.89988600  | -1.14788900 |
|             | C | 3.38013800  | 0.00030900  | 0.45352700  |
|             | H | 3.30588600  | 0.88384100  | 1.09565000  |
|             | H | 3.31302800  | -0.87357400 | 1.10950700  |
|             | C | 4.71612200  | 0.00091100  | -0.15195500 |
|             | N | 5.75357000  | 0.00108000  | -0.66158600 |
|             | H | 0.07376300  | -1.02266600 | 1.93221400  |
| <b>TS16</b> | C | -0.44758000 | -0.00004800 | 0.63025100  |
|             | C | -2.00602000 | 0.67813000  | -0.85734400 |
|             | C | -2.00618000 | -0.67765600 | -0.85743600 |



|             |   |             |             |             |
|-------------|---|-------------|-------------|-------------|
|             | H | -2.59893400 | 1.38099600  | -1.41629300 |
|             | H | -2.59925900 | -1.38030600 | -1.41648400 |
|             | N | -1.05083900 | -1.08029700 | 0.06008500  |
|             | N | -1.05058500 | 1.08042100  | 0.06023100  |
|             | C | -0.70891200 | -2.47160100 | 0.34335700  |
|             | H | -1.45511300 | -3.11325600 | -0.12164300 |
|             | H | 0.27601900  | -2.71121900 | -0.05993100 |
|             | H | -0.70288700 | -2.63936600 | 1.41897200  |
|             | C | -0.70831600 | 2.47160600  | 0.34367600  |
|             | H | -1.45432700 | 3.11350000  | -0.12129700 |
|             | H | -0.70230200 | 2.63925400  | 1.41931000  |
|             | H | 0.27669800  | 2.71101500  | -0.05953400 |
|             | H | 0.80796900  | 1.01544700  | 2.30443500  |
|             | H | 0.80772100  | -1.01602000 | 2.30434000  |
|             | B | 0.75192100  | -0.00024900 | 1.64964700  |
|             | H | 1.84840300  | -0.00035200 | 0.89947000  |
|             | C | 3.23441800  | -0.00043100 | -0.03630800 |
|             | H | 3.74228200  | 0.93177800  | 0.19404800  |
|             | H | 3.74169200  | -0.93314200 | 0.19331800  |
|             | F | 2.75754900  | 0.00022800  | -1.33625900 |
| <b>TS17</b> | C | -0.51066400 | -0.10313500 | 0.53802900  |
|             | C | -1.78602100 | 1.34247000  | -0.64602400 |
|             | C | -2.33441000 | 0.11056700  | -0.78386200 |
|             | H | -2.08865900 | 2.29488100  | -1.04544400 |
|             | H | -3.20600200 | -0.21361400 | -1.32547500 |
|             | N | -1.54789900 | -0.76594500 | -0.05389600 |
|             | N | -0.67226500 | 1.20053400  | 0.16498200  |
|             | C | -1.77812800 | -2.20343200 | 0.04188200  |
|             | H | -2.74263800 | -2.43118000 | -0.40872100 |
|             | H | -0.99558900 | -2.75233700 | -0.48452300 |
|             | H | -1.78308600 | -2.51096100 | 1.08684200  |
|             | C | 0.22570300  | 2.28536800  | 0.54512000  |
|             | H | -0.14239300 | 3.21010400  | 0.10430700  |
|             | H | 0.25653600  | 2.38754000  | 1.63014000  |
|             | H | 1.23322800  | 2.08393000  | 0.17850200  |
|             | H | 1.15694000  | 0.07270400  | 2.14650300  |
|             | H | 0.42097500  | -1.79784900 | 1.83169800  |
|             | B | 0.67365200  | -0.71260100 | 1.36112700  |
|             | H | 1.65609100  | -0.92746700 | 0.46241500  |
|             | C | 2.97614100  | -1.07705900 | -0.47567400 |
|             | H | 3.62649300  | -1.70423500 | 0.13409200  |
|             | H | 2.58844800  | -1.53481200 | -1.38067100 |
|             | O | 3.45209900  | 0.20530400  | -0.73788100 |
|             | H | 3.82002200  | 0.57306300  | 0.07333200  |

|             |             |             |             |             |
|-------------|-------------|-------------|-------------|-------------|
| <b>TS18</b> | C           | 0.02908100  | -0.00001200 | 0.46415800  |
|             | C           | 1.89805500  | -0.67780100 | -0.60841900 |
|             | C           | 1.89798000  | 0.67797800  | -0.60842100 |
|             | H           | 2.60627000  | -1.38127200 | -1.01030800 |
|             | H           | 2.60612100  | 1.38152500  | -1.01030700 |
|             | N           | 0.74914000  | 1.08000800  | 0.05193600  |
|             | N           | 0.74926200  | -1.07995500 | 0.05194700  |
|             | C           | 0.35710400  | 2.47117200  | 0.26238300  |
|             | H           | 1.14718000  | 3.11366200  | -0.12179600 |
|             | H           | -0.57280800 | 2.68716400  | -0.26418700 |
|             | H           | 0.21590200  | 2.66334700  | 1.32528100  |
|             | C           | 0.35735300  | -2.47116100 | 0.26234500  |
|             | H           | 1.14763200  | -3.11356100 | -0.12156600 |
|             | H           | 0.21586000  | -2.66329600 | 1.32520900  |
|             | H           | -0.57237600 | -2.68731600 | -0.26448700 |
|             | H           | -1.57768700 | -1.01484800 | 1.80198800  |
|             | H           | -1.57776800 | 1.01462600  | 1.80204200  |
|             | B           | -1.37761400 | -0.00008600 | 1.17330900  |
|             | H           | -2.26918000 | -0.00009400 | 0.19652000  |
|             | C           | -3.52727200 | -0.00010300 | -0.94128800 |
| H           | -4.39036600 | -0.00130800 | -0.28491100 |             |
| H           | -3.32737300 | 0.92268100  | -1.47509900 |             |
| H           | -3.32596400 | -0.92168200 | -1.47665000 |             |
| <b>TS19</b> | C           | -0.73065800 | -0.15439100 | 0.59133000  |
|             | C           | -2.30139500 | 0.32114100  | -0.95394600 |
|             | C           | -1.70174800 | 1.48829000  | -0.60812200 |
|             | H           | -3.09906800 | 0.11844400  | -1.64723600 |
|             | H           | -1.87418000 | 2.49507400  | -0.94687000 |
|             | N           | -0.74549100 | 1.18258400  | 0.34174700  |
|             | N           | -1.69775900 | -0.67615300 | -0.21083200 |
|             | C           | 0.16857500  | 2.15792600  | 0.93479300  |
|             | H           | -0.25939600 | 3.15146600  | 0.81494500  |
|             | H           | 0.29515600  | 1.93972600  | 1.99285300  |
|             | H           | 1.13943700  | 2.11571800  | 0.43830000  |
|             | C           | -2.04137600 | -2.09492600 | -0.30030400 |
|             | H           | -1.22793200 | -2.65366500 | -0.76397100 |
|             | H           | -2.22954300 | -2.49547800 | 0.69398300  |
|             | H           | -2.93869000 | -2.19256200 | -0.90804400 |
|             | H           | 0.62958700  | -0.28275600 | 2.48418800  |
|             | H           | -0.13639900 | -2.04789200 | 1.82019600  |
|             | B           | 0.24941600  | -0.93923200 | 1.54535200  |
|             | H           | 1.35391500  | -1.12350400 | 0.82039600  |
|             | C           | 3.08161900  | -0.22716800 | -0.63862000 |
| N           | 3.27518100  | 0.78501900  | -1.18444100 |             |

|             |   |             |             |             |
|-------------|---|-------------|-------------|-------------|
|             | C | 2.76892000  | -1.40500500 | 0.05200800  |
|             | H | 2.45013000  | -2.25240700 | -0.54299500 |
|             | H | 3.36275500  | -1.63136300 | 0.92934700  |
| <b>TS20</b> | C | -0.81804700 | -0.15276000 | 0.54539000  |
|             | C | -1.76465000 | 1.57003800  | -0.55325700 |
|             | C | -2.49978400 | 0.46099000  | -0.82172100 |
|             | H | -1.88318000 | 2.58844400  | -0.87989000 |
|             | H | -3.38261200 | 0.33034700  | -1.42290500 |
|             | N | -1.90815100 | -0.58666100 | -0.14118700 |
|             | N | -0.74103800 | 1.17899000  | 0.28801500  |
|             | C | -2.38904800 | -1.96822000 | -0.17572100 |
|             | H | -1.67753500 | -2.60462600 | -0.70192500 |
|             | H | -2.52295600 | -2.34153800 | 0.83773500  |
|             | H | -3.34332100 | -1.98473600 | -0.69836700 |
|             | C | 0.31519500  | 2.06701900  | 0.77577400  |
|             | H | -0.00492300 | 3.09656400  | 0.62701500  |
|             | H | 0.48037400  | 1.88658300  | 1.83620900  |
|             | H | 1.24198900  | 1.88552500  | 0.22923500  |
|             | H | 0.65863800  | -0.40727200 | 2.33382600  |
|             | B | 0.19012200  | -1.01697700 | 1.40246500  |
|             | H | 1.22782700  | -1.21178500 | 0.61299600  |
|             | C | 2.47597200  | -1.48665600 | -0.42223900 |
|             | H | 2.73803200  | -2.44996000 | -0.00040700 |
|             | H | 1.83365500  | -1.48357100 | -1.29593000 |
|             | C | 3.36188600  | -0.38775900 | -0.22485600 |
|             | O | 3.27794600  | 0.70787300  | -0.80882600 |
|             | H | -0.23146500 | -2.11330200 | 1.67152400  |
|             | H | 4.14647800  | -0.53099000 | 0.54115400  |
| <b>TS21</b> | C | -1.17296200 | -0.16370800 | 0.52775200  |
|             | C | -2.29430600 | 1.50547700  | -0.48713400 |
|             | C | -2.97700700 | 0.35541700  | -0.71824100 |
|             | H | -2.49553900 | 2.51680900  | -0.79470600 |
|             | H | -3.88760500 | 0.17545100  | -1.26251600 |
|             | N | -2.27744900 | -0.65897000 | -0.09063200 |
|             | N | -1.19356100 | 1.17159500  | 0.27869400  |
|             | C | -2.67415800 | -2.06714300 | -0.10293200 |
|             | H | -1.91311300 | -2.66939000 | -0.59812700 |
|             | H | -2.80990400 | -2.42771600 | 0.91556400  |
|             | H | -3.61264100 | -2.15321500 | -0.64690500 |
|             | C | -0.16638200 | 2.11845300  | 0.71485500  |
|             | H | -0.51290800 | 3.12604100  | 0.49329800  |
|             | H | -0.00420800 | 2.01644900  | 1.78666400  |
|             | H | 0.76903000  | 1.92760300  | 0.18719700  |
|             | H | 0.43470600  | -0.32263800 | 2.20524300  |

|             |   |             |             |             |
|-------------|---|-------------|-------------|-------------|
|             | B | -0.05986900 | -0.96792000 | 1.31141600  |
|             | H | 0.91706900  | -1.12820400 | 0.44943800  |
|             | C | 2.15828100  | -1.33821700 | -0.67379200 |
|             | H | 2.48089100  | -2.30200800 | -0.30518100 |
|             | H | 1.50641500  | -1.31097400 | -1.53516300 |
|             | C | 2.98636700  | -0.18865000 | -0.44826400 |
|             | O | 2.84339600  | 0.92113200  | -0.95866000 |
|             | O | 3.97333100  | -0.40628100 | 0.47634200  |
|             | H | 4.44458800  | 0.43197300  | 0.59116500  |
|             | H | -0.41318700 | -2.07752100 | 1.62560700  |
| <b>TS22</b> | C | -0.80196200 | -0.00653600 | 0.62833500  |
|             | C | -2.35939500 | 0.47387500  | -0.93161600 |
|             | C | -2.19265700 | -0.87210300 | -0.92323900 |
|             | H | -3.00608300 | 1.09903900  | -1.52218900 |
|             | H | -2.66606600 | -1.64294100 | -1.50593200 |
|             | N | -1.23706700 | -1.15205700 | 0.03764600  |
|             | N | -1.50235300 | 0.99083700  | 0.02431100  |
|             | C | -0.74308800 | -2.49039700 | 0.35494500  |
|             | H | -1.29335200 | -3.21229100 | -0.24539900 |
|             | H | 0.32011500  | -2.56314000 | 0.12535200  |
|             | H | -0.89501700 | -2.70409400 | 1.41222200  |
|             | C | -1.35493000 | 2.41414100  | 0.32213600  |
|             | H | -2.08903700 | 2.96542100  | -0.26237000 |
|             | H | -1.52493200 | 2.59321600  | 1.38273900  |
|             | H | -0.35317500 | 2.75377800  | 0.05839900  |
|             | H | 0.26599500  | 1.17313900  | 2.32884600  |
|             | H | 0.42580700  | -0.85008300 | 2.41442600  |
|             | B | 0.33271800  | 0.13334800  | 1.71597800  |
|             | H | 1.45961800  | 0.18651700  | 1.03566300  |
|             | C | 2.87865400  | 0.22071900  | 0.10649600  |
|             | H | 3.79254100  | 0.40593100  | 0.67211800  |
|             | F | 2.93141600  | -0.98375700 | -0.52713500 |
|             | F | 2.68149500  | 1.18588100  | -0.83395400 |
| <b>TS23</b> | C | -1.42418700 | 0.02365900  | 0.67521700  |
|             | C | -2.61362600 | 0.37273100  | -1.20745700 |
|             | C | -2.40329600 | -0.96306200 | -1.09899800 |
|             | H | -3.13694300 | 0.94403900  | -1.95414500 |
|             | H | -2.70873400 | -1.77702200 | -1.73311000 |
|             | N | -1.67613500 | -1.16156300 | 0.06070900  |
|             | N | -2.00934300 | 0.96362200  | -0.11250600 |
|             | C | -1.20603900 | -2.46421700 | 0.53071400  |
|             | H | -1.68740500 | -3.23892000 | -0.06300100 |
|             | H | -0.12429200 | -2.53704400 | 0.41625400  |
|             | H | -1.46572900 | -2.59356200 | 1.57966700  |

|             |    |             |             |             |
|-------------|----|-------------|-------------|-------------|
|             | C  | -1.98176300 | 2.40347400  | 0.14161900  |
|             | H  | -2.59353700 | 2.89694500  | -0.61099300 |
|             | H  | -2.38077900 | 2.61515000  | 1.13227800  |
|             | H  | -0.96008200 | 2.77819200  | 0.07963400  |
|             | H  | -0.86087000 | 1.30268000  | 2.53594600  |
|             | H  | -0.57236100 | -0.69657500 | 2.71862200  |
|             | B  | -0.57002600 | 0.26573400  | 1.98621800  |
|             | H  | 0.65774900  | 0.40517900  | 1.58909300  |
|             | C  | 2.37400200  | 0.62151500  | 1.17978200  |
|             | H  | 2.44657300  | 1.69567000  | 1.28453100  |
|             | H  | 2.81633400  | 0.00617100  | 1.95155900  |
|             | C  | 2.46957600  | 0.10359500  | -0.18620500 |
|             | F  | 2.13472000  | -1.21414200 | -0.28022700 |
|             | F  | 1.67343200  | 0.77216100  | -1.06638000 |
|             | F  | 3.73968700  | 0.18307600  | -0.73149100 |
| <b>TS24</b> | C  | -0.89976600 | -0.10293300 | 0.63528600  |
|             | C  | -2.00024700 | 1.21458500  | -0.83005000 |
|             | C  | -2.36049600 | -0.06770900 | -1.08505700 |
|             | H  | -2.30050400 | 2.13557500  | -1.29861000 |
|             | H  | -3.03587300 | -0.47597900 | -1.81661600 |
|             | N  | -1.68055400 | -0.86380500 | -0.17955200 |
|             | N  | -1.10765400 | 1.17853700  | 0.22678300  |
|             | C  | -1.77324300 | -2.32110200 | -0.12516000 |
|             | H  | -2.52937500 | -2.64495500 | -0.83777600 |
|             | H  | -0.81527000 | -2.77186700 | -0.38544800 |
|             | H  | -2.05656800 | -2.64033200 | 0.87667000  |
|             | C  | -0.44245600 | 2.34976500  | 0.79258000  |
|             | H  | -0.87846200 | 3.24290900  | 0.34907400  |
|             | H  | -0.58354600 | 2.37217000  | 1.87202000  |
|             | H  | 0.62539000  | 2.31950700  | 0.57250500  |
|             | H  | 0.27158200  | 0.22935600  | 2.61664100  |
|             | H  | -0.18471900 | -1.69885400 | 2.17129000  |
|             | B  | 0.09554900  | -0.59952800 | 1.75293700  |
|             | H  | 1.26229600  | -0.72548000 | 1.14724200  |
|             | C  | 2.79977200  | -0.91996100 | 0.48597200  |
|             | H  | 3.44569600  | -0.65307800 | 1.31366200  |
|             | H  | 2.79651000  | -1.95555700 | 0.16780200  |
|             | Cl | 3.00477400  | 0.18501400  | -0.88736400 |
| <b>TS25</b> | C  | -0.93597300 | -0.04293200 | 0.51834900  |
|             | C  | -2.43015600 | 1.18658400  | -0.65519400 |
|             | C  | -2.84730600 | -0.10254600 | -0.69222300 |
|             | H  | -2.85850800 | 2.07612000  | -1.08333700 |
|             | H  | -3.70827400 | -0.54933900 | -1.15834400 |
|             | N  | -1.92725600 | -0.84600000 | 0.02898600  |

|             |   |             |             |             |
|-------------|---|-------------|-------------|-------------|
|             | N | -1.26136200 | 1.21219900  | 0.08798900  |
|             | C | -1.99729000 | -2.28946200 | 0.22600800  |
|             | H | -2.90855900 | -2.65893700 | -0.24103400 |
|             | H | -1.13501600 | -2.77758900 | -0.22989600 |
|             | H | -2.01387000 | -2.52431000 | 1.29032400  |
|             | C | -0.47198800 | 2.40934000  | 0.35497300  |
|             | H | -0.99112300 | 3.26790400  | -0.06747800 |
|             | H | -0.35312200 | 2.54943900  | 1.42935500  |
|             | H | 0.51496400  | 2.32261800  | -0.10145900 |
|             | H | 0.83711800  | 0.41132700  | 1.94932700  |
|             | H | 0.21804800  | -1.52623700 | 1.88628800  |
|             | B | 0.35124300  | -0.48048000 | 1.29247400  |
|             | H | 1.27070500  | -0.74463600 | 0.33025800  |
|             | C | 2.45545400  | -1.05881600 | -0.73540700 |
|             | H | 2.93013500  | -1.94942500 | -0.31592500 |
|             | H | 1.89179600  | -1.20914900 | -1.65212800 |
|             | O | 3.27645800  | 0.04707000  | -0.83965100 |
|             | C | 4.14818200  | 0.22263500  | 0.27371000  |
|             | H | 4.80479300  | -0.64859100 | 0.39080000  |
|             | H | 4.75212600  | 1.10709100  | 0.07282400  |
|             | H | 3.57569200  | 0.36735700  | 1.19515000  |
| <b>TS26</b> | C | -1.28075600 | -0.05931100 | 0.57481200  |
|             | C | -2.43872900 | 1.39689500  | -0.70962300 |
|             | C | -3.04244200 | 0.18803800  | -0.82087200 |
|             | H | -2.67958200 | 2.34623900  | -1.15551300 |
|             | H | -3.90974800 | -0.11547100 | -1.38108300 |
|             | N | -2.32664100 | -0.69469800 | -0.02935600 |
|             | N | -1.36420400 | 1.23406400  | 0.14816200  |
|             | C | -2.63632300 | -2.11340600 | 0.11844600  |
|             | H | -3.58733700 | -2.31274900 | -0.37221600 |
|             | H | -1.85812700 | -2.72446600 | -0.34102500 |
|             | H | -2.71070500 | -2.37055700 | 1.17423000  |
|             | C | -0.42462800 | 2.28934100  | 0.51422200  |
|             | H | -0.77215100 | 3.22658300  | 0.08328400  |
|             | H | -0.37295500 | 2.38482500  | 1.59847900  |
|             | H | 0.56994600  | 2.05893800  | 0.12866900  |
|             | H | 0.34462100  | 0.09774400  | 2.23015600  |
|             | H | -0.48524600 | -1.74290400 | 1.97209900  |
|             | B | -0.15930900 | -0.69411700 | 1.46719900  |
|             | H | 0.83233500  | -1.00292900 | 0.60009000  |
|             | C | 2.03490100  | -1.43545400 | -0.38610300 |
|             | H | 2.55209700  | -2.18940300 | 0.20461300  |
|             | H | 1.45375900  | -1.83251400 | -1.21399900 |
|             | S | 3.02719400  | -0.06127400 | -0.89579300 |

|             |   |             |             |             |
|-------------|---|-------------|-------------|-------------|
|             | C | 3.89020500  | 0.33236300  | 0.66565600  |
|             | H | 4.49246200  | -0.51733100 | 0.99064700  |
|             | H | 4.54386800  | 1.18176400  | 0.46698600  |
|             | H | 3.17075600  | 0.59684800  | 1.44041700  |
| <b>TS27</b> | C | -0.96601200 | -0.05880800 | 0.59914900  |
|             | C | -2.09091600 | 1.34886500  | -0.77662400 |
|             | C | -2.59935200 | 0.10682200  | -0.96467400 |
|             | H | -2.34994400 | 2.28941900  | -1.23115000 |
|             | H | -3.38617900 | -0.23863300 | -1.61264700 |
|             | N | -1.90877600 | -0.74702800 | -0.11928200 |
|             | N | -1.09751500 | 1.24030400  | 0.18329700  |
|             | C | -2.13878800 | -2.18190300 | -0.01762400 |
|             | H | -2.97815000 | -2.44604200 | -0.65891900 |
|             | H | -1.25379400 | -2.73465800 | -0.33724100 |
|             | H | -2.36986500 | -2.45499200 | 1.01245900  |
|             | C | -0.26635300 | 2.34233800  | 0.64728200  |
|             | H | -0.29711300 | 2.40435200  | 1.73514100  |
|             | H | 0.76882200  | 2.19644100  | 0.33197900  |
|             | H | -0.64672600 | 3.26905600  | 0.22065400  |
|             | H | 1.17100600  | -0.96172500 | 0.77548100  |
|             | B | 0.10206500  | -0.64415700 | 1.57032700  |
|             | H | -0.21988300 | -1.69965500 | 2.06799500  |
|             | H | 0.54466300  | 0.16737700  | 2.35114800  |
|             | C | 2.47160500  | -1.38490500 | -0.03020400 |
|             | H | 2.06190700  | -2.22356200 | -0.58583000 |
|             | H | 3.11294300  | -1.66361900 | 0.80725100  |
|             | N | 2.91071900  | -0.31414800 | -0.82634000 |
|             | H | 3.00405800  | -0.52421700 | -1.81034800 |
|             | C | 3.96819700  | 0.53783100  | -0.30578900 |
|             | H | 4.16834500  | 1.34846900  | -1.00894500 |
|             | H | 3.64974300  | 0.98388000  | 0.64011200  |
|             | H | 4.90855700  | -0.00643600 | -0.12160400 |
| <b>TS28</b> | C | 1.20476800  | 0.21144300  | 0.60885200  |
|             | C | 1.90955400  | -1.57455100 | -0.58495800 |
|             | C | 2.40122600  | -0.46384500 | -1.18721800 |
|             | H | 2.01632300  | -2.61554600 | -0.83575800 |
|             | H | 3.02001200  | -0.35409600 | -2.06077700 |
|             | N | 1.96615900  | 0.62260400  | -0.44736000 |
|             | N | 1.18372400  | -1.15039400 | 0.51488700  |
|             | C | 2.26304800  | 2.01566000  | -0.76542800 |
|             | H | 2.95444100  | 2.03880000  | -1.60576300 |
|             | H | 1.35001200  | 2.54805900  | -1.03538800 |
|             | H | 2.71812500  | 2.50741300  | 0.09374700  |
|             | C | 0.46255900  | -2.03676000 | 1.42263700  |

|             |   |             |             |             |
|-------------|---|-------------|-------------|-------------|
|             | H | 0.72355400  | -1.80439000 | 2.45415000  |
|             | H | -0.61473800 | -1.92078300 | 1.29316400  |
|             | H | 0.74331900  | -3.06438700 | 1.19886600  |
|             | H | -0.76615500 | 1.36591900  | 1.07734600  |
|             | B | 0.44178300  | 1.11264000  | 1.63851400  |
|             | H | 0.93975100  | 2.20506100  | 1.77933800  |
|             | H | 0.17418700  | 0.54112300  | 2.66923600  |
|             | C | -2.22147000 | 1.70642800  | 0.52217600  |
|             | H | -1.95319800 | 2.30969100  | -0.33858500 |
|             | H | -2.65897400 | 2.24438000  | 1.35469800  |
|             | N | -2.88669500 | 0.50821500  | 0.20186900  |
|             | H | -3.35159900 | 0.00705200  | 0.95003300  |
|             | C | -2.80799300 | -0.15052900 | -0.97866300 |
|             | H | -2.27016300 | 0.41737000  | -1.75417200 |
|             | O | -3.29328600 | -1.26236500 | -1.19285800 |
| <b>TS29</b> | C | -1.17436300 | -0.17813800 | 0.52109700  |
|             | C | -2.32006300 | 1.50659200  | -0.43894300 |
|             | C | -3.00902900 | 0.36030500  | -0.67077200 |
|             | H | -2.52831200 | 2.52248000  | -0.72621200 |
|             | H | -3.93334700 | 0.18925000  | -1.19439600 |
|             | N | -2.29460700 | -0.66398500 | -0.07730300 |
|             | N | -1.20071000 | 1.16124300  | 0.29371500  |
|             | C | -2.69242200 | -2.07158100 | -0.10197600 |
|             | H | -1.94744800 | -2.66554900 | -0.63060700 |
|             | H | -2.79768100 | -2.44977600 | 0.91376900  |
|             | H | -3.64707400 | -2.14809800 | -0.61857100 |
|             | C | -0.16048800 | 2.10075800  | 0.71489900  |
|             | H | -0.51685800 | 3.11215600  | 0.52903000  |
|             | H | 0.03849200  | 1.97480700  | 1.77798700  |
|             | H | 0.75669500  | 1.92392500  | 0.15099200  |
|             | H | 0.47692100  | -0.37129000 | 2.15456400  |
|             | B | -0.04155700 | -0.99336400 | 1.25860100  |
|             | H | 0.92806300  | -1.11004500 | 0.36203400  |
|             | C | 2.08706700  | -1.24901500 | -0.77539600 |
|             | H | 2.37043800  | -2.26036300 | -0.50990300 |
|             | H | 1.40066700  | -1.13263000 | -1.60607900 |
|             | C | 2.98098400  | -0.16040400 | -0.49426500 |
|             | O | 2.81231600  | 0.97374400  | -0.98494500 |
|             | H | -0.36826400 | -2.11844800 | 1.54147200  |
|             | C | 4.09584200  | -0.38853400 | 0.51100400  |
|             | H | 3.73375700  | -0.11414300 | 1.50880000  |
|             | H | 4.41947100  | -1.43018900 | 0.54908400  |
|             | H | 4.94580200  | 0.25407500  | 0.27582300  |
| <b>TS30</b> | C | 1.16496100  | 0.17503000  | 0.52755000  |



|             |   |             |             |             |
|-------------|---|-------------|-------------|-------------|
|             | C | 2.27830300  | -1.52341200 | -0.44960200 |
|             | C | 2.97864900  | -0.38600700 | -0.68867000 |
|             | H | 2.47016800  | -2.54155300 | -0.74024200 |
|             | H | 3.89841000  | -0.22572700 | -1.22366500 |
|             | N | 2.28499600  | 0.64681300  | -0.08426300 |
|             | N | 1.17221100  | -1.16499700 | 0.29777900  |
|             | C | 2.69846900  | 2.04903800  | -0.11531500 |
|             | H | 1.96437300  | 2.64857800  | -0.65332800 |
|             | H | 2.79986400  | 2.43285000  | 0.89871800  |
|             | H | 3.65792500  | 2.11170800  | -0.62499400 |
|             | C | 0.12431300  | -2.09143200 | 0.72725600  |
|             | H | 0.46611200  | -3.10713800 | 0.53672800  |
|             | H | -0.06315800 | -1.96483600 | 1.79246400  |
|             | H | -0.79572100 | -1.90183300 | 0.17168100  |
|             | H | -0.47722600 | 0.38574400  | 2.16675200  |
|             | B | 0.05033800  | 1.00496600  | 1.27298900  |
|             | H | -0.91916700 | 1.15405300  | 0.37541300  |
|             | C | -2.14197700 | 1.33896500  | -0.70002100 |
|             | H | -2.47439600 | 2.31254100  | -0.35888900 |
|             | H | -1.52353900 | 1.31680200  | -1.58741000 |
|             | C | -2.97235200 | 0.17325900  | -0.46411400 |
|             | O | -2.78441900 | -0.92016900 | -1.02856400 |
|             | H | 0.40423500  | 2.11959100  | 1.56909700  |
|             | N | -3.98721600 | 0.31614400  | 0.45407000  |
|             | H | -4.02037800 | 1.12150800  | 1.05932800  |
|             | H | -4.43596700 | -0.52413600 | 0.78630500  |
| <b>TS31</b> | C | 1.22357800  | -0.11308500 | 0.64846500  |
|             | C | 2.47447700  | -0.23425200 | -1.22470500 |
|             | C | 2.21744500  | 1.07674000  | -0.98935900 |
|             | H | 3.03804500  | -0.71138900 | -2.00741800 |
|             | H | 2.51044600  | 1.95928200  | -1.53087000 |
|             | N | 1.45454400  | 1.13565000  | 0.16261500  |
|             | N | 1.85903600  | -0.95150700 | -0.21379000 |
|             | C | 0.91411100  | 2.36600600  | 0.73707600  |
|             | H | 1.42457200  | 3.21347100  | 0.28328700  |
|             | H | -0.15591400 | 2.43323600  | 0.53781200  |
|             | H | 1.08076600  | 2.37235400  | 1.81252900  |
|             | C | 1.89142200  | -2.40846300 | -0.09593100 |
|             | H | 2.48356400  | -2.80552700 | -0.91809900 |
|             | H | 2.34325200  | -2.69939700 | 0.85151400  |
|             | H | 0.88173500  | -2.81477000 | -0.14923400 |
|             | H | 0.56643100  | -1.62156200 | 2.29690000  |
|             | H | 0.36366100  | 0.34455400  | 2.76154300  |
|             | B | 0.34190700  | -0.50333200 | 1.89912900  |

|             |   |             |             |             |
|-------------|---|-------------|-------------|-------------|
|             | H | -0.90491000 | -0.51010600 | 1.46937600  |
|             | C | -2.55748800 | -0.53350900 | 1.05818000  |
|             | H | -2.79491900 | -1.53271800 | 1.40308800  |
|             | H | -2.92697100 | 0.29099500  | 1.65800300  |
|             | C | -2.54776700 | -0.33882700 | -0.39348200 |
|             | F | -1.97502400 | 0.87931100  | -0.73873900 |
|             | F | -3.85495100 | -0.26403800 | -0.93718900 |
|             | H | -2.03924200 | -1.11589500 | -0.96395600 |
| <b>TS32</b> | C | 1.07227900  | -0.02934300 | 0.49058900  |
|             | C | 2.92225200  | -0.37467400 | -0.75570500 |
|             | C | 2.69878900  | 0.96249300  | -0.72019200 |
|             | H | 3.69908300  | -0.94528300 | -1.23415900 |
|             | H | 3.24386500  | 1.77856300  | -1.16173100 |
|             | N | 1.56435100  | 1.16025800  | 0.04742000  |
|             | N | 1.92058100  | -0.96982800 | -0.00890400 |
|             | C | 0.96381600  | 2.46431400  | 0.31870100  |
|             | H | 1.63739300  | 3.23718300  | -0.04651200 |
|             | H | 0.00272100  | 2.55300000  | -0.18909500 |
|             | H | 0.81316800  | 2.58823400  | 1.38990500  |
|             | C | 1.78039500  | -2.41073700 | 0.18978400  |
|             | H | 2.67147800  | -2.90049400 | -0.19815000 |
|             | H | 1.67631300  | -2.63031700 | 1.25103000  |
|             | H | 0.90293700  | -2.78434700 | -0.33930700 |
|             | H | -0.23666000 | -1.31959600 | 1.91961900  |
|             | H | -0.55507400 | 0.68647300  | 1.99205900  |
|             | B | -0.24347300 | -0.26972300 | 1.32164500  |
|             | H | -1.21391800 | -0.38866800 | 0.41771600  |
|             | C | -2.51992100 | -0.54870100 | -0.60396100 |
|             | H | -2.14428100 | 0.00645600  | -1.45791400 |
|             | H | -2.52479100 | -1.62843700 | -0.71379500 |
|             | C | -3.59618300 | 0.06397000  | 0.19155800  |
|             | F | -4.87393700 | 0.03886000  | -0.52138100 |
|             | H | -3.42075200 | 1.12025800  | 0.39874300  |
|             | H | -3.79177400 | -0.47108000 | 1.12153500  |
| <b>TS33</b> | C | -0.54495900 | -0.17975500 | 0.30435600  |
|             | C | -2.60507200 | 0.57215500  | -0.23397700 |
|             | C | -2.28301100 | -0.40036500 | -1.12062600 |
|             | H | -3.49069900 | 1.17678000  | -0.14463200 |
|             | H | -2.83502700 | -0.80720100 | -1.94987800 |
|             | N | -1.01740500 | -0.85105600 | -0.78625300 |
|             | N | -1.53590600 | 0.69818900  | 0.63642800  |
|             | C | -0.29500600 | -1.88906900 | -1.51681900 |
|             | H | -0.79867900 | -2.05459000 | -2.46750000 |
|             | H | 0.72764500  | -1.56421000 | -1.70466900 |
|             | H | -0.27481900 | -2.82008400 | -0.94978800 |

|             |   |             |             |             |
|-------------|---|-------------|-------------|-------------|
|             | C | -1.47821200 | 1.66126900  | 1.73228900  |
|             | H | -1.25601200 | 1.15146600  | 2.66895400  |
|             | H | -0.70864900 | 2.41041600  | 1.54163700  |
|             | H | -2.44699100 | 2.15153300  | 1.80764200  |
|             | H | 1.72564300  | 0.41302600  | 0.17233700  |
|             | B | 0.86738300  | -0.27516100 | 0.98153300  |
|             | H | 0.92115100  | 0.31478700  | 2.02842400  |
|             | C | 2.75282200  | 1.27855300  | -0.65004400 |
|             | H | 2.95632400  | 0.57665000  | -1.45378400 |
|             | H | 3.53462900  | 1.35845700  | 0.09964000  |
|             | N | 2.13817800  | 2.48301700  | -1.03057400 |
|             | H | 2.47595400  | 3.32405100  | -0.58638900 |
|             | H | 1.97032600  | 2.61565000  | -2.01700300 |
|             | C | 1.47923400  | -1.70462000 | 1.10993400  |
|             | N | 1.98763600  | -2.74442600 | 1.22277900  |
| <b>TS34</b> | C | 1.29292600  | -0.32196500 | 0.23379500  |
|             | C | 1.27050400  | -2.53450600 | -0.18959200 |
|             | C | 1.37530300  | -1.89198900 | -1.37908000 |
|             | H | 1.22816700  | -3.58460100 | 0.04120400  |
|             | H | 1.44263900  | -2.27526100 | -2.38215000 |
|             | N | 1.38345800  | -0.53651700 | -1.10763700 |
|             | N | 1.22172600  | -1.56200600 | 0.79184500  |
|             | C | 1.47152400  | 0.50430000  | -2.13197600 |
|             | H | 1.31609500  | 0.04055700  | -3.10398600 |
|             | H | 0.69967800  | 1.25415600  | -1.96639700 |
|             | H | 2.45002700  | 0.98324700  | -2.10922500 |
|             | C | 1.10415500  | -1.84397500 | 2.22244600  |
|             | H | 1.15587300  | -2.92178500 | 2.36136800  |
|             | H | 1.91960800  | -1.36859300 | 2.76548600  |
|             | H | 0.15263500  | -1.47647500 | 2.60625200  |
|             | H | 1.29257700  | 0.91522200  | 2.20127600  |
|             | B | 1.17877800  | 1.03818900  | 1.01330900  |
|             | H | -0.14391600 | 1.42557600  | 0.86974200  |
|             | C | -1.55165400 | 1.95050000  | 0.76497000  |
|             | C | 2.00979400  | 2.23876400  | 0.47254600  |
|             | N | 2.60088200  | 3.16987900  | 0.10782600  |
|             | H | -1.50984600 | 2.64332500  | 1.59801000  |
|             | H | -1.45136800 | 2.41670000  | -0.20988100 |
|             | C | -2.47114600 | 0.85322500  | 0.89269500  |
|             | H | -2.79367700 | 0.53421900  | 1.87709400  |
|             | C | -2.92372700 | 0.10709800  | -0.12300200 |
|             | F | -3.73869000 | -0.94477900 | -0.00029800 |
|             | F | -2.65696800 | 0.31750800  | -1.41485600 |
| <b>TS35</b> | C | 0.89231800  | -0.31752200 | -0.10604100 |
|             | C | 2.67839800  | 0.96566300  | 0.38157900  |
|             | C | 1.97998100  | 0.78357000  | 1.52966000  |

|             |   |             |             |             |
|-------------|---|-------------|-------------|-------------|
|             | H | 3.58675200  | 1.50955900  | 0.19009800  |
|             | H | 2.16373800  | 1.13940300  | 2.52833900  |
|             | N | 0.88582400  | -0.00190900 | 1.21819900  |
|             | N | 2.00217000  | 0.28629200  | -0.61446500 |
|             | C | -0.14735400 | -0.38991500 | 2.17890100  |
|             | H | 0.09160700  | 0.06496000  | 3.13795700  |
|             | H | -1.11997500 | -0.02872500 | 1.84219800  |
|             | H | -0.17807600 | -1.47258300 | 2.28923500  |
|             | C | 2.43530400  | 0.22926800  | -2.01066900 |
|             | H | 3.39015200  | 0.74459800  | -2.09167100 |
|             | H | 2.55507900  | -0.80704000 | -2.32355000 |
|             | H | 1.70609400  | 0.71839500  | -2.65609000 |
|             | H | 0.17692400  | -1.36767400 | -2.05418900 |
|             | B | -0.18439800 | -1.09860700 | -0.94261700 |
|             | H | -1.20184000 | -0.17356000 | -1.14991200 |
|             | C | -2.36971000 | 0.68788100  | -1.49849100 |
|             | C | -0.88480100 | -2.30498500 | -0.25178600 |
|             | N | -1.44400500 | -3.20853500 | 0.21759900  |
|             | H | -2.04640300 | 0.93963000  | -2.50392500 |
|             | H | -3.12071800 | -0.09695400 | -1.45271300 |
|             | C | -2.46211800 | 1.75294400  | -0.53901100 |
|             | H | -1.85882100 | 2.63806200  | -0.73497900 |
|             | C | -3.18085900 | 1.71699400  | 0.61107300  |
|             | H | -3.80290100 | 0.86352300  | 0.86391700  |
|             | H | -3.17449500 | 2.54711400  | 1.30776300  |
| <b>TS36</b> | C | -1.14387000 | 0.06810100  | 0.32490800  |
|             | C | -2.85000500 | 0.11249600  | -1.14983800 |
|             | C | -2.98567700 | -1.01097800 | -0.40444100 |
|             | H | -3.45197000 | 0.50188700  | -1.95226800 |
|             | H | -3.72787900 | -1.78944200 | -0.43404800 |
|             | N | -1.93660100 | -1.02672600 | 0.49812500  |
|             | N | -1.71607700 | 0.76409300  | -0.69711100 |
|             | C | -1.71814300 | -2.08336100 | 1.48395900  |
|             | H | -0.79724700 | -2.62481700 | 1.26564400  |
|             | H | -1.65340900 | -1.65542200 | 2.48335400  |
|             | H | -2.55991600 | -2.77149800 | 1.43827900  |
|             | C | -1.21282800 | 2.01747700  | -1.25596900 |
|             | H | -1.39025300 | 2.84473700  | -0.56904400 |
|             | H | -0.14379300 | 1.93419600  | -1.44717200 |
|             | H | -1.73102800 | 2.20669000  | -2.19410700 |
|             | H | 0.30456300  | -0.30781100 | 2.09079200  |
|             | B | 0.19955600  | 0.35946000  | 1.09536300  |
|             | C | 0.49725200  | 1.86169500  | 1.40499100  |
|             | N | 0.76374100  | 2.96383500  | 1.65961700  |

|             |   |             |             |             |
|-------------|---|-------------|-------------|-------------|
|             | H | 1.20809100  | -0.06855800 | 0.31165100  |
|             | C | 2.49110400  | -0.64641900 | -0.44613700 |
|             | C | 3.58837300  | -0.38751800 | 0.55211000  |
|             | H | 4.56003700  | -0.74266900 | 0.17192200  |
|             | H | 3.69560700  | 0.68030900  | 0.76486900  |
|             | H | 3.40218800  | -0.90633100 | 1.49746300  |
|             | C | 2.10422500  | -2.08914100 | -0.63668900 |
|             | H | 1.93155800  | -2.58906400 | 0.32164300  |
|             | H | 1.19758900  | -2.18682400 | -1.24268500 |
|             | H | 2.90041300  | -2.64806200 | -1.15447800 |
|             | C | 2.53296200  | 0.19028400  | -1.69782100 |
|             | H | 1.62852200  | 0.06028400  | -2.30076800 |
|             | H | 2.64452900  | 1.25450900  | -1.46838300 |
|             | H | 3.38682600  | -0.09366000 | -2.33433900 |
| <b>TS37</b> | C | -0.75919200 | -0.08512500 | 0.31669100  |
|             | C | -2.29066100 | -1.00719100 | -1.04953300 |
|             | C | -1.89943400 | -1.96308000 | -0.17031000 |
|             | H | -3.00177600 | -1.04236800 | -1.85621000 |
|             | H | -2.20391200 | -2.98983100 | -0.06697900 |
|             | N | -0.96120000 | -1.38497900 | 0.66332600  |
|             | N | -1.58055000 | 0.13794200  | -0.74428000 |
|             | C | -0.26664500 | -2.09555900 | 1.73677200  |
|             | H | -0.72914500 | -3.07341500 | 1.85300400  |
|             | H | 0.78777900  | -2.22053200 | 1.48664400  |
|             | H | -0.35352900 | -1.54000600 | 2.66869000  |
|             | C | -1.70285400 | 1.39939100  | -1.47617900 |
|             | H | -2.24829300 | 1.20762700  | -2.39780300 |
|             | H | -2.24063900 | 2.13703900  | -0.88124600 |
|             | H | -0.71354000 | 1.78295300  | -1.71955400 |
|             | B | 0.30037100  | 0.87928800  | 0.96640900  |
|             | H | 1.38019700  | 0.82987900  | 0.10446100  |
|             | C | 2.63868800  | 0.78930700  | -0.66367300 |
|             | H | 2.37957900  | 1.54116700  | -1.40313900 |
|             | H | 3.29478500  | 1.13256100  | 0.14259500  |
|             | C | 3.40344600  | -1.36761800 | -0.41398300 |
|             | H | 3.48526600  | -2.39039500 | -0.77063700 |
|             | H | 3.87338200  | -1.11852300 | 0.54423800  |
|             | N | 2.78212700  | -0.49122100 | -1.13923700 |
|             | H | 0.75683700  | 0.46492200  | 1.99410300  |
|             | C | -0.06607200 | 2.39000700  | 1.05647900  |
|             | N | -0.28502000 | 3.52707000  | 1.14193500  |
| <b>TS38</b> | C | 1.20439900  | -2.63757400 | 0.18999400  |
|             | H | 0.84976600  | -3.61034600 | 0.48244600  |
|             | C | 1.87609600  | -2.23508100 | -0.91699800 |

|             |   |             |             |             |
|-------------|---|-------------|-------------|-------------|
|             | H | 2.22158300  | -2.79107700 | -1.77092700 |
|             | N | 2.08267300  | -0.87374700 | -0.79199900 |
|             | C | 2.75816900  | -0.05075300 | -1.79513700 |
|             | H | 2.14456900  | 0.81546000  | -2.03887900 |
|             | H | 3.72624300  | 0.28631400  | -1.42625200 |
|             | H | 2.89990000  | -0.65187900 | -2.69092400 |
|             | N | 1.01653500  | -1.51770000 | 0.97815200  |
|             | C | 0.30810800  | -1.52343900 | 2.25798900  |
|             | H | 0.10637000  | -2.55731100 | 2.53087300  |
|             | H | 0.92404900  | -1.05943500 | 3.02643600  |
|             | H | -0.63390000 | -0.98062600 | 2.17225600  |
|             | C | 1.55611500  | -0.42115100 | 0.37903500  |
|             | H | 1.14356500  | 1.11032800  | 2.07585300  |
|             | B | 1.45431500  | 1.05359500  | 0.91802500  |
|             | C | 2.63778900  | 2.01499400  | 0.59542500  |
|             | N | 3.48565300  | 2.77873800  | 0.37900500  |
|             | H | 0.36489200  | 1.58800100  | 0.28285200  |
|             | C | -0.87357800 | 2.26519100  | -0.30260900 |
|             | H | -0.93227100 | 3.06445500  | 0.42948100  |
|             | C | -1.93455100 | 1.28642300  | -0.31902900 |
|             | C | -2.76687400 | 1.08831200  | 0.80828600  |
|             | C | -2.14006900 | 0.44348000  | -1.43687600 |
|             | C | -3.75462000 | 0.11064400  | 0.81030200  |
|             | H | -2.63202500 | 1.72020700  | 1.68039000  |
|             | C | -3.12939500 | -0.53255300 | -1.43025400 |
|             | H | -1.51698200 | 0.57276300  | -2.31624600 |
|             | C | -3.94532400 | -0.70812200 | -0.30768500 |
|             | H | -4.38409700 | -0.01403000 | 1.68513600  |
|             | H | -3.27079900 | -1.15932600 | -2.30447300 |
|             | H | -4.71875900 | -1.46761300 | -0.30547100 |
|             | H | -0.43529800 | 2.55288100  | -1.25342500 |
| <b>TS39</b> | C | -0.91101400 | 0.09679700  | 0.27977200  |
|             | C | -2.69259300 | 0.05111100  | -1.10034900 |
|             | C | -2.84816500 | -0.95061400 | -0.20055300 |
|             | H | -3.31688600 | 0.36536800  | -1.91849100 |
|             | H | -3.63383900 | -1.67685600 | -0.08596400 |
|             | N | -1.75082700 | -0.91091500 | 0.64226200  |
|             | N | -1.49842700 | 0.68181500  | -0.79943400 |
|             | C | -1.53073800 | -1.84103600 | 1.74909400  |
|             | H | -0.69496900 | -2.50584500 | 1.52874700  |
|             | H | -1.31808400 | -1.28869700 | 2.66270400  |
|             | H | -2.43485800 | -2.43119800 | 1.88431700  |
|             | C | -0.95125100 | 1.81225900  | -1.54786200 |
|             | H | -1.10972100 | 2.74584100  | -1.00767800 |

|             |   |             |             |             |
|-------------|---|-------------|-------------|-------------|
|             | H | 0.11622000  | 1.66507900  | -1.70283900 |
|             | H | -1.45087100 | 1.86086300  | -2.51358900 |
|             | H | 0.68154900  | -0.18856300 | 1.94342900  |
|             | B | 0.49357800  | 0.42050000  | 0.92370800  |
|             | C | 0.80217600  | 1.94079500  | 1.12009100  |
|             | N | 1.07656400  | 3.05886700  | 1.27784800  |
|             | H | 1.42279900  | -0.03395500 | 0.07183600  |
|             | C | 2.63683300  | -0.63524000 | -0.80643200 |
|             | C | 2.18988800  | -2.04175400 | -1.08674200 |
|             | H | 2.93609500  | -2.59326200 | -1.67951700 |
|             | H | 2.04594200  | -2.60512900 | -0.15745800 |
|             | H | 1.25059700  | -2.06701800 | -1.64722800 |
|             | H | 2.56204100  | 0.05231700  | -1.64848900 |
|             | C | 3.83784900  | -0.43808800 | 0.07395600  |
|             | H | 4.75591600  | -0.81159600 | -0.40593400 |
|             | H | 4.00081100  | 0.61768800  | 0.30750900  |
|             | H | 3.73028700  | -0.98128000 | 1.01952900  |
| <b>TS40</b> | C | -0.88148100 | 0.03133800  | 0.27972500  |
|             | C | -2.12261900 | 1.82900800  | -0.26786900 |
|             | C | -2.26167400 | 0.91897400  | -1.26305900 |
|             | H | -2.54612700 | 2.81083200  | -0.14809300 |
|             | H | -2.83300800 | 0.95422400  | -2.17417400 |
|             | N | -1.49134700 | -0.17652000 | -0.91782600 |
|             | N | -1.27553100 | 1.27184000  | 0.67319100  |
|             | C | -1.35625400 | -1.37952700 | -1.73865100 |
|             | H | -1.70093200 | -1.14974800 | -2.74496600 |
|             | H | -0.31108800 | -1.68094200 | -1.77789000 |
|             | H | -1.95033600 | -2.19522400 | -1.32667000 |
|             | C | -0.85030500 | 1.94967700  | 1.89774100  |
|             | H | -1.43387600 | 2.86203400  | 2.00217500  |
|             | H | -1.02381200 | 1.30711900  | 2.75898300  |
|             | H | 0.20893400  | 2.20221300  | 1.84337700  |
|             | H | 0.40041100  | -0.50892900 | 2.13933600  |
|             | B | 0.15432300  | -0.89681900 | 1.02873300  |
|             | H | 1.31276700  | -0.76998700 | 0.36236700  |
|             | C | 2.75848700  | -0.63263800 | -0.32182600 |
|             | H | 3.37252600  | -1.17927400 | 0.38696200  |
|             | H | 2.58719000  | -1.13929100 | -1.26646700 |
|             | S | 3.19492300  | 1.06988600  | -0.57727500 |
|             | H | 3.40970800  | 1.40029600  | 0.71292200  |
|             | C | -0.17926100 | -2.42369400 | 1.02930900  |
|             | N | -0.37942000 | -3.56763800 | 1.04929900  |
| <b>TS41</b> | C | -1.40192700 | -0.21668900 | 0.23167700  |
|             | C | -2.50964900 | -1.37757200 | -1.34916800 |

|             |   |             |             |             |
|-------------|---|-------------|-------------|-------------|
|             | C | -2.21158700 | -2.23766000 | -0.34458700 |
|             | H | -3.03020900 | -1.53291900 | -2.27802900 |
|             | H | -2.42075600 | -3.28699400 | -0.23171800 |
|             | N | -1.53321800 | -1.51288300 | 0.61964700  |
|             | N | -2.00136900 | -0.14335500 | -0.98621400 |
|             | C | -1.02206400 | -2.08216700 | 1.86693400  |
|             | H | -1.39070100 | -3.10246800 | 1.95201700  |
|             | H | 0.06797300  | -2.09101900 | 1.86305700  |
|             | H | -1.37371700 | -1.49746200 | 2.71505900  |
|             | C | -2.10006900 | 1.06361100  | -1.80609100 |
|             | H | -2.30445800 | 0.76726900  | -2.83321300 |
|             | H | -2.90100000 | 1.70957700  | -1.44571200 |
|             | H | -1.15712700 | 1.60581700  | -1.76896200 |
|             | H | -0.28397200 | 0.57641900  | 2.10539900  |
|             | B | -0.61453700 | 0.91950500  | 1.00153300  |
|             | H | 0.52034100  | 1.11876200  | 0.33565200  |
|             | C | 1.99152700  | 1.37825700  | -0.34289300 |
|             | C | 2.80010000  | 0.16377200  | 0.01139100  |
|             | H | 1.69409200  | 1.49724300  | -1.38291500 |
|             | H | 2.24170600  | 2.31197000  | 0.15577400  |
|             | H | 2.30895500  | -0.73684800 | -0.37975900 |
|             | H | 2.83464700  | 0.04868500  | 1.10216600  |
|             | C | 4.24971100  | 0.19533300  | -0.52109500 |
|             | H | 4.75311800  | 1.08818700  | -0.13325000 |
|             | H | 4.22891000  | 0.30261100  | -1.61171900 |
|             | C | -1.33543000 | 2.30811400  | 1.04315400  |
|             | N | -1.82948200 | 3.35832200  | 1.08976900  |
|             | C | 5.05034800  | -1.05452700 | -0.14077900 |
|             | H | 6.07196800  | -1.00602700 | -0.52848800 |
|             | H | 5.11152300  | -1.16797000 | 0.94633400  |
|             | H | 4.58411600  | -1.95978900 | -0.54302800 |
| <b>TS42</b> | C | -1.16366300 | -0.06285000 | 0.21995600  |
|             | C | -2.88726500 | -0.07485600 | -1.22996300 |
|             | C | -2.97729600 | -1.20014100 | -0.47952800 |
|             | H | -3.51116400 | 0.29260400  | -2.02599000 |
|             | H | -3.69438300 | -2.00205700 | -0.49766700 |
|             | N | -1.91489400 | -1.18007200 | 0.40730000  |
|             | N | -1.76738000 | 0.61057200  | -0.79463300 |
|             | C | -1.64846100 | -2.22795200 | 1.39358900  |
|             | H | -2.48577400 | -2.92286100 | 1.38660500  |
|             | H | -0.73279200 | -2.76356000 | 1.14328300  |
|             | H | -1.54909000 | -1.78965300 | 2.38510900  |
|             | C | -1.30624800 | 1.87933000  | -1.35767200 |
|             | H | -1.79671000 | 2.02803100  | -2.31762500 |



|             |   |             |             |             |
|-------------|---|-------------|-------------|-------------|
|             | H | -1.55039500 | 2.70654900  | -0.69124200 |
|             | H | -0.22842700 | 1.84373500  | -1.50639800 |
|             | H | 0.40461000  | -0.43817400 | 1.88989800  |
|             | B | 0.19181500  | 0.28905600  | 0.95653700  |
|             | H | 1.16333600  | 0.04114600  | 0.08186200  |
|             | C | 2.44366200  | -0.30446500 | -0.88877000 |
|             | C | 3.59202300  | -0.56822100 | 0.04337200  |
|             | H | 2.02800900  | -1.15591200 | -1.42457800 |
|             | H | 2.47447500  | 0.61433700  | -1.47113700 |
|             | H | 3.33719500  | -1.39383900 | 0.71793100  |
|             | H | 3.75979700  | 0.30933100  | 0.67832000  |
|             | C | 4.90771900  | -0.91117200 | -0.68471800 |
|             | H | 5.21835900  | -0.09248400 | -1.34047600 |
|             | H | 5.71497400  | -1.09419700 | 0.03234600  |
|             | H | 4.79383700  | -1.80812200 | -1.30079200 |
|             | C | 0.35061800  | 1.78892300  | 1.37347100  |
|             | N | 0.51492200  | 2.89353900  | 1.69296700  |
| <b>TS43</b> | C | -0.97357300 | 0.18166400  | 0.32678700  |
|             | C | -2.70749800 | -0.35283200 | -1.00075100 |
|             | C | -2.72035400 | -1.20717800 | 0.05313500  |
|             | H | -3.36202200 | -0.27476300 | -1.85101200 |
|             | H | -3.38752000 | -2.01590600 | 0.29478400  |
|             | N | -1.65268200 | -0.86705900 | 0.86055700  |
|             | N | -1.62916400 | 0.49139400  | -0.82240900 |
|             | C | -1.30731200 | -1.56462500 | 2.10101400  |
|             | H | -0.37062000 | -2.10875000 | 1.98185700  |
|             | H | -1.21091600 | -0.84932800 | 2.91557200  |
|             | H | -2.10595600 | -2.26740500 | 2.32820100  |
|             | C | -1.25665500 | 1.55589500  | -1.75622100 |
|             | H | -1.46452800 | 2.53354400  | -1.32309600 |
|             | H | -0.19722800 | 1.48421900  | -1.99687300 |
|             | H | -1.83884000 | 1.42981100  | -2.66663000 |
|             | H | 0.60182800  | 0.44058300  | 2.02188600  |
|             | B | 0.35377400  | 0.80801300  | 0.90806100  |
|             | C | 0.52804400  | 2.35029400  | 0.75539600  |
|             | N | 0.70823000  | 3.49281600  | 0.65882600  |
|             | H | 1.36338000  | 0.26414300  | 0.16928700  |
|             | C | 2.62967200  | -0.27574500 | -0.53151200 |
|             | H | 2.68148200  | 0.47947400  | -1.31165500 |
|             | C | 3.68430400  | -0.19475900 | 0.54999200  |
|             | H | 4.67676100  | -0.43256400 | 0.15171900  |
|             | H | 3.72112800  | 0.81667700  | 0.95923200  |
|             | H | 3.47186400  | -0.88969200 | 1.36479100  |
|             | C | 2.23777800  | -1.54805800 | -1.00098000 |

|             |             |             |             |             |
|-------------|-------------|-------------|-------------|-------------|
|             | N           | 1.85445600  | -2.59115700 | -1.34833600 |
| <b>TS44</b> | C           | 4.18728600  | -1.33574800 | -0.54007400 |
|             | H           | 4.87180300  | -2.16539800 | -0.56694400 |
|             | C           | 4.12342100  | -0.21476600 | -1.29976500 |
|             | H           | 4.74185000  | 0.12015400  | -2.11416900 |
|             | N           | 3.04208900  | 0.51812800  | -0.84530300 |
|             | C           | 2.61970300  | 1.80018600  | -1.40889500 |
|             | H           | 1.53708600  | 1.81155000  | -1.52102200 |
|             | H           | 2.92352000  | 2.62278400  | -0.76153600 |
|             | H           | 3.08340500  | 1.91549200  | -2.38660300 |
|             | N           | 3.14799500  | -1.26555800 | 0.37095700  |
|             | C           | 2.86365000  | -2.29334100 | 1.37369300  |
|             | H           | 3.67192000  | -3.02150300 | 1.35348800  |
|             | H           | 2.80589600  | -1.84265900 | 2.36291300  |
|             | H           | 1.92158500  | -2.79358200 | 1.14988700  |
|             | C           | 2.43727100  | -0.12157700 | 0.18974700  |
|             | H           | 0.90024400  | -0.41711100 | 1.90468200  |
|             | B           | 1.11663000  | 0.29183700  | 0.95830600  |
|             | C           | 1.02740000  | 1.80080400  | 1.36312700  |
|             | N           | 0.91387800  | 2.91371000  | 1.67534700  |
|             | H           | 0.11202500  | 0.07396400  | 0.11440300  |
|             | C           | -1.21716100 | -0.22651100 | -0.80134400 |
|             | H           | -1.07471900 | 0.52170900  | -1.57779100 |
|             | H           | -0.98534300 | -1.24283400 | -1.11208100 |
|             | C           | -2.37602800 | -0.03785900 | 0.13459600  |
|             | H           | -2.36442700 | 0.98111200  | 0.53926700  |
|             | H           | -2.27605500 | -0.71587900 | 0.99070400  |
|             | C           | -3.74381300 | -0.28771100 | -0.53297700 |
|             | H           | -3.78086800 | -1.30469200 | -0.93358700 |
|             | H           | -3.87627700 | 0.39574500  | -1.37628400 |
|             | C           | -4.90350600 | -0.09232600 | 0.46862900  |
|             | H           | -4.89529400 | 0.92591400  | 0.86951800  |
|             | H           | -4.79174400 | -0.77163200 | 1.31937300  |
| C           | -6.21229000 | -0.33119700 | -0.13010500 |             |
| N           | -7.23872600 | -0.52514300 | -0.62179300 |             |
| <b>TS45</b> | C           | -1.85101200 | -2.48881800 | 0.25694200  |
|             | H           | -1.84895200 | -3.55114100 | 0.08609000  |
|             | C           | -2.22556500 | -1.76587200 | 1.34103300  |
|             | H           | -2.61596800 | -2.07688400 | 2.29430300  |
|             | N           | -2.01591800 | -0.43488600 | 1.02904700  |
|             | C           | -2.28773100 | 0.67699300  | 1.94038000  |
|             | H           | -1.48125200 | 1.40508800  | 1.87891400  |
|             | H           | -3.23040700 | 1.16128200  | 1.68529200  |
| H           | -2.34148900 | 0.28548700  | 2.95446100  |             |

|             |   |             |             |             |
|-------------|---|-------------|-------------|-------------|
|             | N | -1.42651400 | -1.58689700 | -0.70228400 |
|             | C | -0.92434900 | -1.96916500 | -2.02300200 |
|             | H | -1.07770000 | -3.03900700 | -2.14818100 |
|             | H | -1.46715100 | -1.43161000 | -2.79828100 |
|             | H | 0.13907100  | -1.74441200 | -2.10480900 |
|             | C | -1.52774100 | -0.31566100 | -0.23330000 |
|             | H | -0.80882300 | 0.78802900  | -2.14388500 |
|             | B | -1.06459500 | 0.99721100  | -0.98824800 |
|             | C | -2.02835100 | 2.22244100  | -0.84679000 |
|             | N | -2.70835500 | 3.16001200  | -0.76464900 |
|             | H | 0.08464700  | 1.37234400  | -0.43986800 |
|             | C | 1.57161400  | 1.84756200  | 0.07639700  |
|             | H | 1.75345100  | 2.64065800  | -0.64393400 |
|             | H | 1.32339300  | 2.19434800  | 1.07627800  |
|             | C | 2.40068900  | 0.60397000  | -0.03980600 |
|             | H | 2.38227000  | 0.22934100  | -1.06784000 |
|             | H | 1.99431600  | -0.18687100 | 0.59819600  |
|             | C | 3.88542500  | 0.83958900  | 0.36427400  |
|             | H | 4.33467500  | 1.60651700  | -0.27247900 |
|             | H | 3.94650700  | 1.19853100  | 1.39526000  |
|             | C | 4.68967600  | -0.37449400 | 0.25484400  |
|             | N | 5.29656700  | -1.35208900 | 0.15872700  |
| <b>TS46</b> | C | -0.70960800 | -0.04346800 | 0.22114200  |
|             | C | -2.55681800 | 0.53754500  | -0.92955800 |
|             | C | -2.79713800 | -0.66516400 | -0.35224600 |
|             | H | -3.17797600 | 1.15522800  | -1.55442400 |
|             | H | -3.66771100 | -1.29684400 | -0.37921800 |
|             | N | -1.65650300 | -1.01013600 | 0.35162500  |
|             | N | -1.27076900 | 0.90435900  | -0.57550900 |
|             | C | -1.50398100 | -2.25099400 | 1.11214400  |
|             | H | -0.76172200 | -2.89668600 | 0.64292500  |
|             | H | -1.19334100 | -2.02776100 | 2.13129700  |
|             | H | -2.46536800 | -2.76039300 | 1.12924100  |
|             | C | -0.61637000 | 2.13859100  | -1.00847700 |
|             | H | -0.61809000 | 2.87710400  | -0.20662900 |
|             | H | 0.41094500  | 1.92448900  | -1.29749500 |
|             | H | -1.15658000 | 2.53206400  | -1.86740900 |
|             | H | 0.92263300  | -1.00441800 | 1.56275300  |
|             | B | 0.76578700  | -0.09752900 | 0.78901600  |
|             | C | 1.29493100  | 1.24508700  | 1.39340500  |
|             | N | 1.73387200  | 2.22200100  | 1.84323800  |
|             | H | 1.55575800  | -0.37456700 | -0.24683200 |
|             | C | 2.62945100  | -0.79513800 | -1.41285000 |
|             | H | 2.02376900  | -1.52677500 | -1.94252100 |

|             |   |             |             |             |
|-------------|---|-------------|-------------|-------------|
|             | H | 2.71698600  | 0.16143500  | -1.92234000 |
|             | C | 3.83476300  | -1.29770400 | -0.67315200 |
|             | H | 4.63290900  | -1.61786700 | -1.35894900 |
|             | H | 4.26134800  | -0.52353500 | -0.02818200 |
|             | H | 3.58993000  | -2.15992400 | -0.04522700 |
| <b>TS47</b> | C | 3.24169100  | -1.19960200 | -0.53494100 |
|             | H | 3.97247000  | -1.98892600 | -0.55758000 |
|             | C | 3.11330100  | -0.08778100 | -1.30057000 |
|             | H | 3.71049800  | 0.27809500  | -2.11747400 |
|             | N | 1.99325100  | 0.58436600  | -0.84786200 |
|             | C | 1.49840100  | 1.83903000  | -1.41616600 |
|             | H | 0.41848200  | 1.78409700  | -1.54091700 |
|             | H | 1.74460600  | 2.67732200  | -0.76481200 |
|             | H | 1.96514100  | 1.98306700  | -2.38838000 |
|             | N | 2.20126300  | -1.18377500 | 0.37644700  |
|             | C | 1.97776600  | -2.22162500 | 1.38530500  |
|             | H | 2.81658400  | -2.91364900 | 1.35161300  |
|             | H | 1.91739700  | -1.77254700 | 2.37497000  |
|             | H | 1.05525500  | -2.76258900 | 1.17632700  |
|             | C | 1.42833800  | -0.08353500 | 0.19008500  |
|             | H | -0.08956600 | -0.45681300 | 1.90925200  |
|             | B | 0.09064200  | 0.26741000  | 0.96743000  |
|             | C | -0.05353800 | 1.76991000  | 1.38612400  |
|             | N | -0.20400800 | 2.87516600  | 1.70743200  |
|             | H | -0.90043300 | 0.01938300  | 0.13122400  |
|             | C | -2.25031000 | -0.33753700 | -0.76661200 |
|             | H | -2.22547300 | 0.46139600  | -1.50050200 |
|             | H | -1.98084500 | -1.32078700 | -1.13858400 |
|             | C | -3.35462800 | -0.27873200 | 0.26329300  |
|             | H | -3.17249900 | -0.98932300 | 1.07566900  |
|             | H | -3.41590900 | 0.71545400  | 0.71665400  |
|             | C | -4.66727800 | -0.58775100 | -0.31285200 |
|             | N | -5.68641700 | -0.83654200 | -0.79696100 |
| <b>TS48</b> | C | -0.62352400 | 0.30081600  | -0.00410700 |
|             | C | -2.66221800 | -0.64806300 | 0.07414300  |
|             | C | -1.92431700 | -1.18038500 | 1.07968800  |
|             | H | -3.67874200 | -0.83281400 | -0.22597000 |
|             | H | -2.17504000 | -1.91604200 | 1.82368200  |
|             | N | -0.67554400 | -0.59152600 | 1.01812500  |
|             | N | -1.85233600 | 0.26182300  | -0.58146300 |
|             | C | 0.43675300  | -0.91423700 | 1.91389900  |
|             | H | 0.14466100  | -1.76356600 | 2.52806900  |
|             | H | 1.31464200  | -1.17896000 | 1.32582000  |
|             | H | 0.66782000  | -0.06452200 | 2.55514400  |

|             |   |             |             |             |
|-------------|---|-------------|-------------|-------------|
|             | C | -2.27446800 | 1.04786200  | -1.74233500 |
|             | H | -3.35177300 | 0.94157000  | -1.85258300 |
|             | H | -2.02787200 | 2.09651200  | -1.58971700 |
|             | H | -1.78136700 | 0.68870500  | -2.64580500 |
|             | H | 0.34283700  | 1.89991200  | -1.38951500 |
|             | B | 0.62594300  | 1.13850900  | -0.50392300 |
|             | H | 1.47082100  | 0.26836500  | -1.04188100 |
|             | C | 2.53697200  | -0.81208200 | -1.67610900 |
|             | H | 2.14394800  | -1.05175900 | -2.65959500 |
|             | H | 3.50177700  | -0.31967400 | -1.60385200 |
|             | F | 2.45862100  | -1.89563900 | -0.82519100 |
|             | C | 1.42606800  | 1.86839100  | 0.62672500  |
|             | N | 2.05350700  | 2.41922700  | 1.43349800  |
| <b>TS49</b> | C | 0.57793400  | 0.07656900  | 0.27289700  |
|             | C | 2.56814600  | -0.85083100 | -0.23557600 |
|             | C | 2.42078500  | 0.24906900  | -1.01356200 |
|             | H | 3.37057000  | -1.56477200 | -0.17219100 |
|             | H | 3.07130800  | 0.67825500  | -1.75545100 |
|             | N | 1.19424600  | 0.80594400  | -0.69716300 |
|             | N | 1.43272700  | -0.94554300 | 0.55017100  |
|             | C | 0.64284400  | 2.00147500  | -1.33302200 |
|             | H | 1.22730700  | 2.21751300  | -2.22528400 |
|             | H | -0.39291100 | 1.82199700  | -1.61788400 |
|             | H | 0.68553500  | 2.85336600  | -0.65454700 |
|             | C | 1.19354300  | -2.01080400 | 1.52277200  |
|             | H | 2.10345000  | -2.60073200 | 1.61337600  |
|             | H | 0.94169000  | -1.58155900 | 2.49118800  |
|             | H | 0.37780100  | -2.65370700 | 1.19085500  |
|             | H | -1.06914900 | -0.44461600 | 1.82185100  |
|             | B | -0.86530200 | 0.27084100  | 0.87674400  |
|             | H | -1.72934900 | -0.16087700 | -0.06353800 |
|             | C | -2.82355200 | -0.82632000 | -1.03740600 |
|             | H | -3.74820500 | -0.39613200 | -0.65493900 |
|             | H | -2.50457900 | -0.48429200 | -2.01693000 |
|             | O | -2.70465500 | -2.20333000 | -0.92961900 |
|             | H | -3.08215600 | -2.48997700 | -0.09041300 |
|             | C | -1.27936500 | 1.74415300  | 1.18994300  |
|             | N | -1.63976900 | 2.82218300  | 1.43140100  |
| <b>TS50</b> | C | 0.34508700  | -0.10321800 | -0.16777000 |
|             | C | 1.90875400  | 1.38775400  | 0.46265800  |
|             | C | 2.54900800  | 0.23977400  | 0.13012400  |
|             | H | 2.29059600  | 2.33208700  | 0.80960300  |
|             | H | 3.59586400  | -0.00878600 | 0.13389100  |
|             | N | 1.57740300  | -0.66650000 | -0.25571600 |

|             |   |             |             |             |
|-------------|---|-------------|-------------|-------------|
|             | N | 0.55680200  | 1.16060900  | 0.28081900  |
|             | C | 1.85842100  | -2.03860800 | -0.68259700 |
|             | H | 1.46001600  | -2.75085900 | 0.03942200  |
|             | H | 1.41129500  | -2.22507300 | -1.65735700 |
|             | H | 2.93773200  | -2.15865300 | -0.74943600 |
|             | C | -0.48883300 | 2.15143400  | 0.53789500  |
|             | H | -0.83272400 | 2.59697400  | -0.39563000 |
|             | H | -1.32802200 | 1.67360800  | 1.03968000  |
|             | H | -0.07822900 | 2.92610900  | 1.18246000  |
|             | H | -0.89511600 | -1.91420300 | -0.92540300 |
|             | B | -1.04104200 | -0.82853600 | -0.43047000 |
|             | C | -2.07893600 | 0.01552500  | -1.24601000 |
|             | N | -2.88170600 | 0.60895200  | -1.83878700 |
|             | H | -1.58284100 | -1.04061800 | 0.75205600  |
|             | C | -2.31526500 | -1.42038500 | 2.21013700  |
|             | H | -1.45464000 | -1.73508700 | 2.78997600  |
|             | H | -2.76019900 | -0.46790000 | 2.47568700  |
|             | H | -2.99543800 | -2.19999400 | 1.88656500  |
| <b>TS51</b> | C | 2.52681200  | -0.93365200 | -0.23587400 |
|             | H | 3.34630300  | -1.60706700 | -0.05531900 |
|             | C | 2.15804400  | -0.26618200 | -1.35846200 |
|             | H | 2.59545300  | -0.24660000 | -2.34126200 |
|             | N | 1.02532500  | 0.45698900  | -1.04205100 |
|             | C | 0.30336900  | 1.31104600  | -1.98739500 |
|             | H | -0.76745800 | 1.14548800  | -1.88741900 |
|             | H | 0.52693300  | 2.36117500  | -1.80096900 |
|             | H | 0.61359000  | 1.04441100  | -2.99551100 |
|             | N | 1.61605400  | -0.60151700 | 0.74772400  |
|             | C | 1.65306500  | -1.13276800 | 2.11273100  |
|             | H | 2.57782800  | -1.69281100 | 2.23258200  |
|             | H | 1.62813900  | -0.31596200 | 2.83126000  |
|             | H | 0.80489900  | -1.79491600 | 2.28410900  |
|             | C | 0.68768500  | 0.25856200  | 0.25747300  |
|             | H | -0.53304500 | 0.56773900  | 2.21665600  |
|             | B | -0.56670000 | 0.81881100  | 1.04492700  |
|             | C | -0.92344900 | 2.31822300  | 0.78728300  |
|             | N | -1.22892500 | 3.42498600  | 0.62094800  |
|             | H | -1.62005100 | 0.12068200  | 0.59344300  |
|             | C | -2.95052200 | -0.65573300 | 0.18744400  |
|             | H | -3.40817600 | -0.69248900 | 1.16924000  |
|             | H | -3.35924900 | 0.07548700  | -0.50050800 |
|             | C | -2.54111800 | -1.88038000 | -0.36293900 |
|             | N | -2.13459300 | -2.87672700 | -0.80840700 |
| <b>TS52</b> | C | -0.81000800 | -0.31204700 | 0.07114800  |

|             |   |             |             |             |
|-------------|---|-------------|-------------|-------------|
|             | C | -2.62056900 | 0.98745500  | -0.20436700 |
|             | C | -1.88618300 | 1.05806900  | -1.34411200 |
|             | H | -3.55320600 | 1.45349600  | 0.06142500  |
|             | H | -2.05442000 | 1.60220600  | -2.25699700 |
|             | N | -0.77881500 | 0.25569100  | -1.16057000 |
|             | N | -1.94687100 | 0.14392200  | 0.65604000  |
|             | C | 0.30939500  | 0.11891800  | -2.13441000 |
|             | H | 1.19514400  | 0.64404600  | -1.77322600 |
|             | H | 0.53701900  | -0.93303300 | -2.29244900 |
|             | H | -0.01856300 | 0.56070700  | -3.07289200 |
|             | C | -2.41392700 | -0.20064200 | 2.00197300  |
|             | H | -3.39447500 | 0.24810000  | 2.14489200  |
|             | H | -2.49147200 | -1.28128800 | 2.10542700  |
|             | H | -1.72631100 | 0.18845200  | 2.75186600  |
|             | H | -0.04345400 | -1.61714000 | 1.84607100  |
|             | B | 0.27450600  | -1.24492600 | 0.75286400  |
|             | H | 1.33966300  | -0.45108500 | 0.96938400  |
|             | C | 2.68066600  | 0.28787400  | 1.21978200  |
|             | H | 2.77336600  | 0.03193100  | 2.26971800  |
|             | H | 3.25058400  | -0.31279300 | 0.51840200  |
|             | C | 2.42374800  | 1.65539100  | 0.87817400  |
|             | O | 2.51077900  | 2.12393600  | -0.26729800 |
|             | H | 2.08158900  | 2.30590100  | 1.70433500  |
|             | C | 0.81610000  | -2.41727700 | -0.12611400 |
|             | N | 1.24718000  | -3.29572700 | -0.74894700 |
| <b>TS53</b> | C | 1.10613500  | -0.12273900 | 0.29786300  |
|             | C | 2.17195600  | -2.07064100 | -0.04567600 |
|             | C | 2.84207900  | -1.11062600 | -0.73145200 |
|             | H | 2.35635900  | -3.12648200 | 0.04787900  |
|             | H | 3.72367100  | -1.16952600 | -1.34544900 |
|             | N | 2.17340000  | 0.07904500  | -0.51633900 |
|             | N | 1.10974800  | -1.44992000 | 0.58112000  |
|             | C | 2.57668500  | 1.35908600  | -1.10450200 |
|             | H | 3.33601200  | 1.16124800  | -1.85785000 |
|             | H | 1.72054200  | 1.83731800  | -1.57655800 |
|             | H | 2.98499600  | 2.01896400  | -0.34036900 |
|             | C | 0.10961100  | -2.14978700 | 1.39304700  |
|             | H | 0.42821900  | -3.18406900 | 1.50369400  |
|             | H | 0.03830600  | -1.68547200 | 2.37503800  |
|             | H | -0.86218100 | -2.11682800 | 0.89984300  |
|             | H | -0.57910100 | 0.51454600  | 1.76210600  |
|             | B | -0.01200600 | 0.89562700  | 0.77495000  |
|             | H | -0.94810100 | 0.85082200  | -0.15511000 |
|             | C | -2.13954000 | 0.66208400  | -1.25871700 |

|             |   |             |             |             |
|-------------|---|-------------|-------------|-------------|
|             | H | -2.41587100 | 1.70450400  | -1.34396400 |
|             | H | -1.50732000 | 0.23721300  | -2.02597500 |
|             | C | -3.03047600 | -0.24478700 | -0.57995800 |
|             | O | -2.93426300 | -1.46788500 | -0.56199200 |
|             | O | -4.00610500 | 0.39393900  | 0.13026700  |
|             | H | -4.52341700 | -0.28649100 | 0.58641400  |
|             | C | 0.40483100  | 2.39550700  | 0.91615700  |
|             | N | 0.65730600  | 3.52074700  | 1.03933000  |
| <b>TS54</b> | C | 0.85859400  | 0.17077500  | 0.25041500  |
|             | C | 2.72319000  | -0.73782400 | -0.61717500 |
|             | C | 2.17633400  | 0.06001000  | -1.56807700 |
|             | H | 3.61052000  | -1.34603200 | -0.63393400 |
|             | H | 2.49732500  | 0.28167900  | -2.57085600 |
|             | N | 1.03077500  | 0.60776400  | -1.02288600 |
|             | N | 1.90486000  | -0.65823100 | 0.49455400  |
|             | C | 0.13135500  | 1.51981600  | -1.73253300 |
|             | H | 0.39892000  | 1.51171500  | -2.78703100 |
|             | H | -0.89746600 | 1.18124000  | -1.62033100 |
|             | H | 0.22712100  | 2.53145000  | -1.33951800 |
|             | C | 2.14122400  | -1.39118400 | 1.74038800  |
|             | H | 3.13843800  | -1.82397900 | 1.69587500  |
|             | H | 2.07818300  | -0.71192000 | 2.58786300  |
|             | H | 1.40619000  | -2.18732300 | 1.85825600  |
|             | H | -0.18340400 | 0.00691800  | 2.32460600  |
|             | B | -0.35264200 | 0.47280900  | 1.23067900  |
|             | H | -1.39911400 | -0.16324700 | 0.73790800  |
|             | C | -2.67089800 | -1.01653600 | 0.10335100  |
|             | H | -3.58078200 | -0.93821200 | 0.69791500  |
|             | F | -2.85012000 | -0.52863500 | -1.15108000 |
|             | F | -2.24113000 | -2.29950700 | 0.01077600  |
|             | C | -0.76943700 | 1.97999200  | 1.32031400  |
|             | N | -1.11472800 | 3.08427400  | 1.41097400  |
| <b>TS55</b> | C | 1.33575000  | -0.02652800 | 0.22064700  |
|             | C | 2.28758600  | -1.96241000 | -0.40657700 |
|             | C | 2.12991700  | -1.20378000 | -1.52028600 |
|             | H | 2.70035200  | -2.94785100 | -0.27969000 |
|             | H | 2.38095900  | -1.40071800 | -2.54783200 |
|             | N | 1.54024700  | -0.02063600 | -1.11973600 |
|             | N | 1.79626400  | -1.22587300 | 0.65469800  |
|             | C | 1.18736600  | 1.07344600  | -2.02686600 |
|             | H | 1.18609100  | 0.68767000  | -3.04418200 |
|             | H | 0.19328900  | 1.44301500  | -1.78376600 |
|             | H | 1.90893400  | 1.88577100  | -1.94364400 |
|             | C | 1.76610200  | -1.70218400 | 2.04021800  |



|             |    |             |             |             |
|-------------|----|-------------|-------------|-------------|
|             | H  | 2.31954200  | -2.63741500 | 2.08926100  |
|             | H  | 2.23282500  | -0.96977300 | 2.69567100  |
|             | H  | 0.73826300  | -1.87263600 | 2.35904200  |
|             | H  | 0.70506500  | 0.83988100  | 2.28435400  |
|             | B  | 0.62725800  | 1.08413200  | 1.11143400  |
|             | H  | -0.64764200 | 1.04096500  | 0.83364700  |
|             | C  | -2.34534100 | 1.04198900  | 0.64981300  |
|             | H  | -2.63918000 | 1.08991300  | 1.69029100  |
|             | H  | -2.47708100 | 1.93411400  | 0.05120400  |
|             | C  | 1.08743500  | 2.55445100  | 0.81813200  |
|             | N  | 1.39800900  | 3.65604900  | 0.62962900  |
|             | C  | -2.62481100 | -0.22881200 | -0.03109800 |
|             | F  | -2.20612200 | -1.31140900 | 0.67915700  |
|             | F  | -2.03161600 | -0.31200100 | -1.25440900 |
|             | F  | -3.96485800 | -0.44963700 | -0.26670000 |
| <b>TS56</b> | C  | -0.87577100 | 0.10830200  | 0.23938400  |
|             | C  | -2.10158100 | -0.77178100 | -1.42895600 |
|             | C  | -2.34783200 | -1.50025400 | -0.31178600 |
|             | H  | -2.48602300 | -0.86472100 | -2.42970300 |
|             | H  | -2.98668500 | -2.35131000 | -0.15285400 |
|             | N  | -1.58984500 | -0.94820000 | 0.70456200  |
|             | N  | -1.19241200 | 0.20819000  | -1.07688100 |
|             | C  | -1.55822600 | -1.46059100 | 2.07595900  |
|             | H  | -2.31480300 | -2.23731000 | 2.16480800  |
|             | H  | -0.57898400 | -1.88263400 | 2.30038900  |
|             | H  | -1.77643200 | -0.65893300 | 2.77895100  |
|             | C  | -0.65123600 | 1.20263200  | -2.00403800 |
|             | H  | -0.80373000 | 0.84460600  | -3.02017100 |
|             | H  | -1.15341100 | 2.16139900  | -1.87472300 |
|             | H  | 0.41491500  | 1.32618500  | -1.82429100 |
|             | B  | 0.17254600  | 0.96731100  | 1.06269500  |
|             | H  | 1.36973100  | 0.59288900  | 0.64305000  |
|             | C  | 2.90475100  | 0.14985100  | 0.24046200  |
|             | H  | 3.17471800  | 0.87488000  | -0.51787700 |
|             | H  | 3.41221700  | 0.20820000  | 1.19551200  |
|             | Cl | 2.87547700  | -1.49846700 | -0.39582400 |
|             | H  | 0.15058000  | 0.71163000  | 2.23626800  |
|             | C  | 0.09343000  | 2.51311000  | 0.82528500  |
|             | N  | 0.07523700  | 3.66356700  | 0.67207700  |
| <b>TS57</b> | C  | 0.95735600  | -0.06997500 | 0.27302000  |
|             | C  | 2.56472600  | -1.56239800 | -0.24854300 |
|             | C  | 2.81745500  | -0.43004100 | -0.94905400 |
|             | H  | 3.09015000  | -2.50082100 | -0.21466500 |
|             | H  | 3.60623900  | -0.19126600 | -1.64087500 |

|             |   |             |             |             |
|-------------|---|-------------|-------------|-------------|
|             | N | 1.82241500  | 0.47566900  | -0.62588100 |
|             | N | 1.42281500  | -1.32942400 | 0.49804000  |
|             | C | 1.71816700  | 1.81994200  | -1.19103000 |
|             | H | 2.41127800  | 1.89511200  | -2.02661800 |
|             | H | 0.70419800  | 1.99256400  | -1.54974400 |
|             | H | 1.96670900  | 2.57269400  | -0.44324000 |
|             | C | 0.80720900  | -2.31405900 | 1.38644000  |
|             | H | 1.46696500  | -3.17718800 | 1.44771600  |
|             | H | 0.67369300  | -1.88869200 | 2.37990400  |
|             | H | -0.16147100 | -2.62699700 | 0.99610400  |
|             | H | -0.83067500 | -0.11515600 | 1.74807300  |
|             | B | -0.37636100 | 0.53982100  | 0.84849300  |
|             | H | -1.29310400 | 0.44401100  | -0.14548000 |
|             | C | -2.45151900 | 0.27553800  | -1.24740400 |
|             | H | -3.05295000 | 1.17231500  | -1.08472000 |
|             | H | -1.87379000 | 0.24474700  | -2.16671200 |
|             | O | -3.09732100 | -0.91856700 | -1.02785900 |
|             | C | -0.33089100 | 2.05424500  | 1.22661400  |
|             | N | -0.35562900 | 3.17993000  | 1.51425000  |
|             | C | -4.00687000 | -0.89761000 | 0.07175500  |
|             | H | -4.77981800 | -0.13567500 | -0.08280500 |
|             | H | -4.47035500 | -1.88210300 | 0.12092700  |
|             | H | -3.47769100 | -0.69118700 | 1.00688900  |
| <b>TS58</b> | C | 1.21393600  | -0.11861900 | 0.30108700  |
|             | C | 2.41693300  | -1.96395600 | -0.17271600 |
|             | C | 2.86365000  | -0.96858400 | -0.97698600 |
|             | H | 2.72531200  | -2.99122100 | -0.08758400 |
|             | H | 3.63803700  | -0.96175200 | -1.72401700 |
|             | N | 2.11461400  | 0.15635000  | -0.68125900 |
|             | N | 1.40667900  | -1.43031600 | 0.60749000  |
|             | C | 2.27761800  | 1.44971100  | -1.34426100 |
|             | H | 2.86048400  | 1.29961900  | -2.25085800 |
|             | H | 1.30172800  | 1.85357400  | -1.60843400 |
|             | H | 2.79357600  | 2.15451900  | -0.69233300 |
|             | C | 0.64556300  | -2.19036800 | 1.59856800  |
|             | H | 1.10109000  | -3.17366000 | 1.69712800  |
|             | H | 0.67160100  | -1.68026800 | 2.56003800  |
|             | H | -0.39029600 | -2.30221700 | 1.27734300  |
|             | H | -0.42761600 | 0.34177600  | 1.87479400  |
|             | B | 0.08606700  | 0.81000700  | 0.89435700  |
|             | H | -0.90412900 | 0.81571800  | -0.02755500 |
|             | C | -2.11772300 | 0.81931900  | -1.06196700 |
|             | H | -2.61939200 | 1.74721500  | -0.79563600 |
|             | H | -1.56783400 | 0.85136500  | -1.99841900 |

|             |   |             |             |             |
|-------------|---|-------------|-------------|-------------|
|             | S | -3.09202200 | -0.64415600 | -0.92632700 |
|             | C | 0.47017800  | 2.30591200  | 1.12348900  |
|             | N | 0.69909500  | 3.43021500  | 1.30597100  |
|             | C | -3.97323700 | -0.32655900 | 0.64197100  |
|             | H | -4.58486200 | 0.57244000  | 0.55662600  |
|             | H | -4.61761000 | -1.18585500 | 0.82686600  |
|             | H | -3.26230000 | -0.21965900 | 1.46095100  |
| <b>TS59</b> | C | 0.91478600  | -0.11809600 | 0.30225900  |
|             | C | 2.01061500  | -2.01243200 | -0.25759800 |
|             | C | 2.37214100  | -1.05610500 | -1.14661300 |
|             | H | 2.30679700  | -3.04372800 | -0.17652100 |
|             | H | 3.04478000  | -1.09490100 | -1.98564300 |
|             | N | 1.69217500  | 0.09910100  | -0.79956700 |
|             | N | 1.12047500  | -1.42851700 | 0.62762500  |
|             | C | 1.79120400  | 1.36227000  | -1.52522700 |
|             | H | 2.28782600  | 1.17595600  | -2.47570200 |
|             | H | 0.79423900  | 1.75897700  | -1.71362500 |
|             | H | 2.36315700  | 2.09368200  | -0.95385900 |
|             | C | 0.47836100  | -2.13259200 | 1.73341400  |
|             | H | 0.62895600  | -1.58526500 | 2.66309800  |
|             | H | -0.59187400 | -2.23720700 | 1.55002600  |
|             | H | 0.92726500  | -3.12048400 | 1.81805700  |
|             | H | -1.21897900 | 0.87057400  | 0.19205300  |
|             | B | -0.10188300 | 0.85349400  | 0.99420100  |
|             | H | -0.50922100 | 0.43484300  | 2.04560300  |
|             | C | -2.54763300 | 0.90908600  | -0.63394700 |
|             | H | -2.21107000 | 1.50882600  | -1.47480200 |
|             | H | -3.16990800 | 1.43970200  | 0.08594300  |
|             | N | -2.94649700 | -0.38932100 | -0.95528300 |
|             | H | -2.96694300 | -0.61533100 | -1.93858500 |
|             | C | 0.32969500  | 2.34747700  | 1.11116300  |
|             | N | 0.59430000  | 3.47524600  | 1.21538100  |
|             | C | -3.96699600 | -1.04437700 | -0.15374400 |
|             | H | -4.09093800 | -2.07564200 | -0.48829800 |
|             | H | -3.65750000 | -1.06555400 | 0.89446000  |
|             | H | -4.94338300 | -0.53887200 | -0.20855000 |
| <b>TS60</b> | C | 1.03572600  | -0.29425500 | 0.28878500  |
|             | C | 1.23718700  | -2.50634200 | -0.08769000 |
|             | C | 1.69199100  | -1.86212500 | -1.19029100 |
|             | H | 1.16319000  | -3.55686800 | 0.13269800  |
|             | H | 2.09375200  | -2.24361500 | -2.11263700 |
|             | N | 1.55795000  | -0.50656600 | -0.95010700 |
|             | N | 0.84001200  | -1.53493200 | 0.81316300  |
|             | C | 1.92864300  | 0.53722400  | -1.90511200 |

|             |   |             |             |             |
|-------------|---|-------------|-------------|-------------|
|             | H | 2.04631400  | 0.07940300  | -2.88543100 |
|             | H | 1.14249700  | 1.28883400  | -1.95297700 |
|             | H | 2.86335400  | 1.01438900  | -1.61080000 |
|             | C | 0.27111700  | -1.82116900 | 2.13002700  |
|             | H | 0.80764600  | -1.26464300 | 2.89647100  |
|             | H | -0.78388400 | -1.54727400 | 2.15694400  |
|             | H | 0.37102700  | -2.88792600 | 2.31956400  |
|             | H | -0.53722400 | 1.46046700  | 0.40071800  |
|             | B | 0.63222000  | 1.06995400  | 0.96810500  |
|             | H | 0.35580000  | 0.94391500  | 2.13054300  |
|             | C | -1.93984800 | 1.94493600  | -0.13073000 |
|             | H | -1.70354300 | 2.09894300  | -1.17825200 |
|             | H | -2.08614000 | 2.84334100  | 0.45683400  |
|             | N | -2.89192500 | 0.93946500  | 0.10644800  |
|             | H | -3.31444500 | 0.88666400  | 1.02623500  |
|             | C | 1.61164600  | 2.26554000  | 0.74731100  |
|             | N | 2.30146300  | 3.18952800  | 0.60673300  |
|             | C | -3.18324200 | -0.08559300 | -0.73298000 |
|             | H | -2.68516000 | 0.00435200  | -1.71132300 |
|             | O | -3.93326400 | -1.01893900 | -0.45733600 |
| <b>TS61</b> | C | -1.06966300 | 0.10466400  | -0.17279400 |
|             | C | -2.35183000 | -1.63240400 | 0.44783700  |
|             | C | -1.88383000 | -1.04242000 | 1.57723400  |
|             | H | -2.99863500 | -2.48173400 | 0.31418000  |
|             | H | -2.03925200 | -1.28459700 | 2.61396200  |
|             | N | -1.10101100 | 0.02282800  | 1.18110300  |
|             | N | -1.84381500 | -0.91755500 | -0.61900000 |
|             | C | -0.34130900 | 0.87308200  | 2.10334700  |
|             | H | 0.71586600  | 0.60467500  | 2.06389600  |
|             | H | -0.47177800 | 1.91908900  | 1.83488100  |
|             | H | -0.72472900 | 0.71091400  | 3.10867500  |
|             | C | -2.12025500 | -1.23036400 | -2.02361700 |
|             | H | -2.86744300 | -2.02042200 | -2.05418200 |
|             | H | -2.50450400 | -0.34903400 | -2.53328200 |
|             | H | -1.21329500 | -1.57152400 | -2.52170400 |
|             | H | -0.41289900 | 0.93584400  | -2.25065600 |
|             | B | -0.24101200 | 1.10871200  | -1.07731600 |
|             | H | 1.05204700  | 0.79957900  | -0.87143500 |
|             | C | 2.59209000  | 0.62475300  | -0.67906000 |
|             | H | 2.85451500  | 0.64590300  | -1.73125200 |
|             | H | 2.73887000  | 1.54520300  | -0.12516900 |
|             | C | 2.72218500  | -0.61482800 | 0.05157600  |
|             | O | 2.66924800  | -0.64938100 | 1.29249600  |
|             | C | -0.35629500 | 2.61904900  | -0.69245800 |

|             |   |             |             |             |
|-------------|---|-------------|-------------|-------------|
|             | N | -0.41009100 | 3.74851700  | -0.43274900 |
|             | C | 2.87875100  | -1.89333600 | -0.75088600 |
|             | H | 2.18123500  | -1.91897000 | -1.59305500 |
|             | H | 3.88932600  | -1.94791800 | -1.16922400 |
|             | H | 2.71710400  | -2.76122200 | -0.11158300 |
| <b>TS62</b> | C | 1.09997000  | -0.12271000 | 0.30699600  |
|             | C | 2.11467300  | -2.10122200 | -0.02157500 |
|             | C | 2.81800200  | -1.16285400 | -0.70337500 |
|             | H | 2.26767700  | -3.16171200 | 0.07587600  |
|             | H | 3.70337400  | -1.24837600 | -1.30874600 |
|             | N | 2.18099900  | 0.04634100  | -0.49781500 |
|             | N | 1.06421900  | -1.44910000 | 0.59381300  |
|             | C | 2.62372100  | 1.31188600  | -1.08765500 |
|             | H | 1.78667100  | 1.80720900  | -1.57625100 |
|             | H | 3.03564700  | 1.96776500  | -0.32192000 |
|             | H | 3.38986300  | 1.09123100  | -1.82778600 |
|             | C | 0.03263600  | -2.11882300 | 1.39160200  |
|             | H | 0.32210400  | -3.16091400 | 1.51062900  |
|             | H | -0.04030500 | -1.64946900 | 2.37127300  |
|             | H | -0.92967100 | -2.05987100 | 0.88124300  |
|             | H | -0.57224400 | 0.57068100  | 1.75935200  |
|             | B | 0.00386500  | 0.92448400  | 0.76649600  |
|             | H | -0.93623500 | 0.88105100  | -0.16915600 |
|             | C | -2.12760500 | 0.69907300  | -1.25323900 |
|             | H | -2.41448100 | 1.74081300  | -1.34249600 |
|             | H | -1.50605300 | 0.29241400  | -2.04010000 |
|             | C | -3.01328600 | -0.24388200 | -0.58239500 |
|             | O | -2.83157400 | -1.47316700 | -0.61647400 |
|             | N | -4.03986100 | 0.29387600  | 0.14297200  |
|             | H | -4.19622400 | 1.28673900  | 0.20011500  |
|             | H | -4.64099400 | -0.31926600 | 0.67076400  |
|             | C | 0.44551500  | 2.41867800  | 0.88516800  |
|             | N | 0.70927100  | 3.54370200  | 0.99008000  |
| <b>TS63</b> | C | -1.37323100 | 0.00147900  | -0.24520900 |
|             | C | -3.15993700 | -0.60524000 | 0.97764600  |
|             | C | -2.56798600 | 0.44008300  | 1.60767900  |
|             | H | -4.03260400 | -1.17984800 | 1.23424700  |
|             | H | -2.82696000 | 0.95271000  | 2.51752400  |
|             | N | -1.47047500 | 0.79844400  | 0.84848800  |
|             | N | -2.41624000 | -0.86299600 | -0.15856900 |
|             | C | -0.54972100 | 1.88399300  | 1.19557700  |
|             | H | -0.73678700 | 2.17043200  | 2.22846300  |
|             | H | 0.47763600  | 1.53853000  | 1.09964000  |
|             | H | -0.71113000 | 2.74260300  | 0.54451600  |

|             |   |             |             |             |
|-------------|---|-------------|-------------|-------------|
|             | C | -2.71948400 | -1.93392900 | -1.11081600 |
|             | H | -3.67245900 | -2.37695100 | -0.82950100 |
|             | H | -2.79099700 | -1.52823000 | -2.11808700 |
|             | H | -1.94300400 | -2.69788900 | -1.08200500 |
|             | H | -0.54604600 | -0.71329900 | -2.29402700 |
|             | B | -0.24461600 | -0.01829000 | -1.36177300 |
|             | H | 0.80606700  | -0.60615300 | -0.82985800 |
|             | C | 2.15473100  | -1.46681000 | -0.32606100 |
|             | H | 1.71444300  | -2.09267200 | 0.44310000  |
|             | H | 2.39339400  | -1.94606300 | -1.26808800 |
|             | C | 0.23774600  | 1.38778700  | -1.85558800 |
|             | N | 0.62986900  | 2.40528900  | -2.25195200 |
|             | C | 3.09762000  | -0.43517600 | 0.12837000  |
|             | F | 2.57669200  | 0.28069800  | 1.19864200  |
|             | F | 4.28619000  | -0.99987600 | 0.63456300  |
|             | H | 3.40508500  | 0.28260700  | -0.63125500 |
| <b>TS64</b> | C | -1.12093100 | -0.06014700 | -0.22001700 |
|             | C | -2.93392900 | -1.20496100 | 0.45822800  |
|             | C | -2.84993400 | -0.08495400 | 1.21841200  |
|             | H | -3.64995800 | -2.00795000 | 0.46598600  |
|             | H | -3.47895700 | 0.27505400  | 2.01378300  |
|             | N | -1.72986200 | 0.60512100  | 0.79454500  |
|             | N | -1.86703300 | -1.17628000 | -0.42126300 |
|             | C | -1.27778300 | 1.87472900  | 1.36564000  |
|             | H | -1.77623100 | 2.01776300  | 2.32210900  |
|             | H | -0.20125100 | 1.84347200  | 1.52300000  |
|             | H | -1.52175500 | 2.70187800  | 0.69937000  |
|             | C | -1.59232200 | -2.21817700 | -1.41351000 |
|             | H | -2.43246100 | -2.90939600 | -1.42184600 |
|             | H | -1.47999600 | -1.77204400 | -2.39980300 |
|             | H | -0.68222600 | -2.75902400 | -1.15507300 |
|             | H | 0.46747400  | -0.42314700 | -1.87941900 |
|             | B | 0.23435000  | 0.30758200  | -0.95544000 |
|             | H | 1.20334600  | 0.07798300  | -0.07572500 |
|             | C | 2.45148000  | -0.25869700 | 0.94048200  |
|             | H | 2.52748300  | 0.69403000  | 1.45505100  |
|             | H | 1.99497700  | -1.06313000 | 1.50901900  |
|             | C | 0.37813000  | 1.80844000  | -1.37501100 |
|             | N | 0.52885100  | 2.91351200  | -1.69638100 |
|             | C | 3.53119800  | -0.61454000 | -0.00192900 |
|             | F | 4.74536700  | -0.97649200 | 0.71131500  |
|             | H | 3.29073200  | -1.48894900 | -0.60781100 |
|             | H | 3.81961400  | 0.21734000  | -0.64534900 |
